# Supplementary material for: The Discovery, Distribution, and Evolution of Viruses Associated with Drosophila melanogaster
Source: PLoS Biol. 2015 Jul 14;13(7):e1002210. doi: 10.1371/journal.pbio.1002210 (PMC4501690; doi:10.1371/journal.pbio.1002210)
Supplement: S3 Table — Potential miRNA binding sites in D. melanogaster 3′ UTRs predicted by miRanda, and Gene Ontology enrichment analyses for genes with a miRanda score >150. (XLSX) [file pbio.1002210.s026.xlsx]

## Sheet: Genes
Flybase Transcript	Flybase Gene	Gene Name	Total Score	Total Energy	Max Score	Max Energy	Strand	3' UTR length	Predicted binding positions in 3' UTR
FBtr0332498	FBgn0261822	Bsg-RJ	936	-73.89	175	-16.22	19328	7228	3000 2128 2983 11 796 3266
FBtr0079568	FBgn0261822	Bsg-RD	936	-73.89	175	-16.22	19330	8647	4419 3547 4402 1430 2215 4685
FBtr0079571	FBgn0261822	Bsg-RF	936	-73.89	175	-16.22	19335	8647	4419 3547 4402 1430 2215 4685					Gap Open Penalty: -9.000000
FBtr0304656	FBgn0003435	sm-RM	915	-69.8	159	-15.49	10945	12700	11039 11635 11059 9783 7313 11761					Gap Extend Penalty: -4.000000
FBtr0310331	FBgn0003435	sm-RAB	915	-69.8	159	-15.49	10946	12700	11039 11635 11059 9783 7313 11761					Score Threshold: 140.000000
FBtr0308791	FBgn0003435	sm-RU	915	-69.8	159	-15.49	10950	12700	11039 11635 11059 9783 7313 11761					Energy Threshold: 1.000000 kcal/mol
FBtr0308797	FBgn0003435	sm-RAA	915	-69.8	159	-15.49	10955	12700	11039 11635 11059 9783 7313 11761					Scaling Parameter: 4.000000
FBtr0082854	FBgn0263396	sqd-RA	867	-62.47	162	-12.58	21424	4471	2702 4158 4369 340 1590 1911
FBtr0333525	FBgn0259171	Pde9-RF	798	-68.71	175	-16.91	17729	6192	2869 2582 5932 5792 4250
FBtr0333473	FBgn0026206	mei-P26-RB	757	-61.68	160	-16.47	25646	18494	6899 1907 14465 11335 7103
FBtr0333474	FBgn0026206	mei-P26-RC	757	-61.68	160	-16.47	25647	18494	6899 1907 14465 11335 7103
FBtr0073414	FBgn0262735	Imp-RH	725	-55.4	151	-13.43	19903	9200	5909 4509 9118 1346 3814
FBtr0079574	FBgn0261822	Bsg-RG	633	-48.94	175	-15.8	19332	6023	1795 923 1778 2061
FBtr0343539	FBgn0039883	RhoGAP100F-RJ	606	-48.23	155	-13.21	12678	5186	4527 1744 2031 1482
FBtr0304594	FBgn0039883	RhoGAP100F-RE	606	-48.23	155	-13.21	12682	5186	4527 1744 2031 1482
FBtr0073416	FBgn0262735	Imp-RD	579	-42.66	151	-13.43	19904	6264	5909 4509 1346 3814
FBtr0333484	FBgn0010473	tutl-RH	468	-39.62	167	-16.96	20410	2293	549 605 295
FBtr0333485	FBgn0010473	tutl-RI	468	-39.62	167	-16.96	20411	4423	2255 2311 2001
FBtr0333726	FBgn0262742	Fas1-RG	465	-39.17	161	-13.94	19949	2580	1171 1160 1100
FBtr0076539	FBgn0011206	bol-RC	463	-31.69	161	-12.11	20571	603	114 78 149
FBtr0076541	FBgn0011206	bol-RA	463	-31.69	161	-12.11	20573	603	114 78 149
FBtr0300462	FBgn0011206	bol-RE	463	-31.69	161	-12.11	20574	1107	618 582 653
FBtr0331249	FBgn0264270	Sxl-RF	461	-34.63	161	-12.61	21829	2691	1563 2314 1654
FBtr0331250	FBgn0264270	Sxl-RG	461	-34.63	161	-12.61	21830	1607	479 1230 570
FBtr0331257	FBgn0264270	Sxl-RN	461	-34.63	161	-12.61	21836	1607	479 1230 570
FBtr0331259	FBgn0264270	Sxl-RA	461	-34.63	161	-12.61	21838	1607	479 1230 570
FBtr0331262	FBgn0264270	Sxl-RD	461	-34.63	161	-12.61	21841	1607	479 1230 570
FBtr0331263	FBgn0264270	Sxl-RE	461	-34.63	161	-12.61	21842	1607	479 1230 570
FBtr0336727	FBgn0264270	Sxl-RZ	461	-34.63	161	-12.61	21849	2715	1587 2338 1678
FBtr0301417	FBgn0031294	IA-2-RD	461	-34.55	160	-13.41	29216	5575	2108 4457 2455
FBtr0304603	FBgn0004595	pros-RH	459	-35.51	156	-13.01	11586	15530	7756 4336 352
FBtr0304604	FBgn0004595	pros-RI	459	-35.51	156	-13.01	11587	15530	7756 4336 352
FBtr0304608	FBgn0004595	pros-RM	459	-35.51	156	-13.01	11591	15530	7756 4336 352
FBtr0309829	FBgn0039883	RhoGAP100F-RH	458	-35.02	155	-13.04	12676	3475	2816 33 320
FBtr0343538	FBgn0039883	RhoGAP100F-RI	458	-35.02	155	-13.04	12677	4801	2816 33 320
FBtr0302180	FBgn0039883	RhoGAP100F-RC	458	-35.02	155	-13.04	12680	3475	2816 33 320
FBtr0302181	FBgn0039883	RhoGAP100F-RD	458	-35.02	155	-13.04	12681	4801	2816 33 320
FBtr0304595	FBgn0039883	RhoGAP100F-RF	458	-35.02	155	-13.04	12683	4801	2816 33 320
FBtr0330270	FBgn0263995	cpo-RO	457	-36.7	158	-13.33	21674	6322	5730 2702 3488
FBtr0330274	FBgn0263995	cpo-RS	457	-36.7	158	-13.33	21678	5698	5106 2078 2864
FBtr0330275	FBgn0263995	cpo-RT	457	-36.7	158	-13.33	21679	6186	5594 2566 3352
FBtr0330277	FBgn0263995	cpo-RV	457	-36.7	158	-13.33	21681	6184	5592 2564 3350
FBtr0301694	FBgn0038693	unc79-RD	455	-36.33	158	-12.79	9702	738	163 561 194
FBtr0309117	FBgn0263392	Tet-RA	454	-40.51	158	-15.86	21411	2343	1969 1209 1545
FBtr0309118	FBgn0263392	Tet-RB	454	-40.51	158	-15.86	21412	2063	1969 1209 1545
FBtr0309119	FBgn0263392	Tet-RC	454	-40.51	158	-15.86	21413	2063	1969 1209 1545
FBtr0309120	FBgn0263392	Tet-RD	454	-40.51	158	-15.86	21414	2343	1969 1209 1545
FBtr0333880	FBgn0263392	Tet-RE	454	-40.51	158	-15.86	21415	2343	1969 1209 1545
FBtr0333881	FBgn0263392	Tet-RF	454	-40.51	158	-15.86	21416	2063	1969 1209 1545
FBtr0083205	FBgn0013334	Sap47-RB	450	-38.29	151	-13.25	21007	3840	314 2530 1932
FBtr0083209	FBgn0013334	Sap47-RF	450	-38.29	151	-13.25	21011	3840	314 2530 1932
FBtr0346129	FBgn0267001	Ten-a-RO	449	-38.09	155	-13.99	23020	4031	1690 2905 3067
FBtr0310078	FBgn0267001	Ten-a-RN	449	-38.09	155	-13.99	23026	4031	1690 2905 3067
FBtr0307032	FBgn0004838	Hrb27C-RH	448	-36.04	154	-13.51	11732	6602	3124 169 6151
FBtr0071132	FBgn0029979	CG10777-RB	446	-33.9	155	-13	27520	5005	2496 385 122
FBtr0344137	FBgn0029979	CG10777-RC	446	-33.9	155	-13	27521	3024	2496 385 122
FBtr0344647	FBgn0266098	rg-RL	439	-38.36	148	-15.99	22671	4045	2311 1867 3757
FBtr0344648	FBgn0266098	rg-RM	439	-38.36	148	-15.99	22672	4045	2311 1867 3757
FBtr0344649	FBgn0266098	rg-RN	439	-38.36	148	-15.99	22673	4045	2311 1867 3757
FBtr0344651	FBgn0266098	rg-RP	439	-38.36	148	-15.99	22675	4045	2311 1867 3757
FBtr0344652	FBgn0266098	rg-RQ	439	-38.36	148	-15.99	22676	4045	2311 1867 3757
FBtr0344668	FBgn0266098	rg-RR	439	-38.36	148	-15.99	22677	4045	2311 1867 3757
FBtr0070742	FBgn0029746	CG15465-RA	439	-38.36	148	-15.99	27215	14275	12541 12097 13987
FBtr0344669	FBgn0029746	CG15465-RB	439	-38.36	148	-15.99	27216	14896	13162 12718 14608
FBtr0304860	FBgn0262475	bru-2-RF	437	-31.58	149	-12.26	19645	2519	1612 617 2226
FBtr0073418	FBgn0262735	Imp-RC	428	-29.23	148	-12.42	19905	4561	4509 1346 3814
FBtr0342823	FBgn0267911	trol-RAX	425	-29.73	144	-12.54	23220	4467	595 4230 754
FBtr0301582	FBgn0003429	slo-RS	328	-29.61	175	-20.99	10929	4185	3333 87
FBtr0330286	FBgn0003429	slo-RT	328	-29.61	175	-20.99	10930	3779	3333 87
FBtr0339838	FBgn0030479	Rbp1-like-RC	328	-33.69	165	-18.53	28109	790	427 329
FBtr0333136	FBgn0004880	scrt-RB	326	-30.16	172	-15.44	11793	5945	2445 171
FBtr0305573	FBgn0004395	unk-RE	322	-29.87	171	-18.4	11466	3699	846 3258
FBtr0337052	FBgn0004395	unk-RF	322	-29.87	171	-18.4	11467	4287	846 3258
FBtr0089682	FBgn0261618	larp-RB	321	-25.08	163	-15.03	19146	2420	1876 1393
FBtr0301180	FBgn0261618	larp-RD	321	-25.08	163	-15.03	19147	2420	1876 1393
FBtr0089680	FBgn0261618	larp-RA	321	-25.08	163	-15.03	19148	2420	1876 1393
FBtr0301181	FBgn0261618	larp-RE	321	-25.08	163	-15.03	19149	2420	1876 1393
FBtr0306388	FBgn0261618	larp-RF	321	-25.08	163	-15.03	19150	2420	1876 1393
FBtr0306389	FBgn0261618	larp-RG	321	-25.08	163	-15.03	19151	2420	1876 1393
FBtr0306390	FBgn0261618	larp-RH	321	-25.08	163	-15.03	19152	2420	1876 1393
FBtr0346001	FBgn0267033	mamo-RI	321	-28.6	167	-17.34	23035	7983	365 2587
FBtr0346002	FBgn0267033	mamo-RH	321	-28.6	167	-17.34	23036	3251	365 2587
FBtr0079795	FBgn0267252	Ggamma30A-RA	321	-28.06	168	-15.37	23057	2103	264 246
FBtr0079796	FBgn0267252	Ggamma30A-RB	321	-28.06	168	-15.37	23058	637	264 246
FBtr0079797	FBgn0267252	Ggamma30A-RC	321	-28.06	168	-15.37	23059	11333	264 246
FBtr0303895	FBgn0267252	Ggamma30A-RF	321	-28.06	168	-15.37	23060	637	264 246
FBtr0309247	FBgn0267252	Ggamma30A-RG	321	-28.06	168	-15.37	23061	637	264 246
FBtr0330019	FBgn0267252	Ggamma30A-RH	321	-28.06	168	-15.37	23062	4360	264 246
FBtr0336620	FBgn0267252	Ggamma30A-RI	321	-28.06	168	-15.37	23063	637	264 246
FBtr0077000	FBgn0024921	Trn-RA	320	-31.98	172	-17.59	25139	2664	1902 1388
FBtr0333059	FBgn0024921	Trn-RD	320	-31.98	172	-17.59	25142	2664	1902 1388
FBtr0308916	FBgn0029708	CG3556-RB	320	-27.23	165	-14.33	27173	1878	1546 1380
FBtr0343348	FBgn0029962	CG1402-RC	319	-27.22	168	-15.17	27502	2323	74 1556
FBtr0110978	FBgn0031885	Mnn1-RC	315	-28.75	161	-15	1543	1865	546 1429
FBtr0310558	FBgn0263773	fok-RA	315	-28.76	166	-15.44	21555	479	301 359
FBtr0310559	FBgn0263773	fok-RC	315	-28.76	166	-15.44	21556	1177	301 359
FBtr0083945	FBgn0014029	Sep2-RA	315	-24.24	162	-13.1	23419	217	163 117
FBtr0334579	FBgn0014029	Sep2-RB	315	-24.24	162	-13.1	23420	217	163 117
FBtr0344078	FBgn0029657	CG12535-RF	315	-19.75	159	-12.85	27107	4720	1888 4212
FBtr0345351	FBgn0035959	CG4911-RC	314	-27.52	159	-15.19	6445	3321	1010 1374
FBtr0089658	FBgn0003380	Sh-RB	314	-27.56	157	-17.55	10838	5404	387 3615
FBtr0334567	FBgn0085412	CG34383-RJ	314	-26.83	158	-14.75	16942	5383	4063 2944
FBtr0113301	FBgn0039600	CG1646-RH	313	-36.09	161	-18.35	12302	3085	2839 2685
FBtr0301402	FBgn0264491	how-RE	313	-27.51	159	-17.1	21990	1566	591 1463
FBtr0084177	FBgn0264491	how-RA	313	-27.51	159	-17.1	21991	2424	591 1463
FBtr0301401	FBgn0264491	how-RD	313	-27.51	159	-17.1	21992	2344	511 1383
FBtr0335195	FBgn0264491	how-RF	313	-27.51	159	-17.1	21995	2424	591 1463
FBtr0071641	FBgn0026369	Sara-RA	313	-26.44	163	-15.7	25700	402	77 369
FBtr0303273	FBgn0261802	CG42748-RD	312	-31.26	163	-16.64	19303	1320	151 1015
FBtr0112790	FBgn0000017	Abl-RB	311	-24.66	166	-14.71	17	6908	6284 220
FBtr0345369	FBgn0000017	Abl-RJ	311	-24.66	166	-14.71	25	6908	6284 220
FBtr0346130	FBgn0263005	CG43313-RB	311	-26.79	161	-14.83	21079	1247	571 1174
FBtr0333767	FBgn0265523	Smr-RF	311	-28.71	163	-18.68	22503	3097	1475 2282
FBtr0333768	FBgn0265523	Smr-RG	311	-28.71	163	-18.68	22504	3097	1475 2282
FBtr0075539	FBgn0036534	DCP2-RB	310	-28.83	163	-16.61	7126	445	201 218
FBtr0075538	FBgn0036534	DCP2-RA	310	-28.83	163	-16.61	7127	445	201 218
FBtr0100528	FBgn0036534	DCP2-RD	310	-28.83	163	-16.61	7128	445	201 218
FBtr0304975	FBgn0036534	DCP2-RE	310	-28.83	163	-16.61	7129	2711	201 218
FBtr0343752	FBgn0266173	pre-mod(mdg4)-K-RA	310	-25.84	160	-13.25	22709	2700	1617 495
FBtr0344178	FBgn0266377	Pde8-RE	310	-26.77	158	-13.98	22754	2155	1951 976
FBtr0344182	FBgn0266377	Pde8-RI	310	-26.77	158	-13.98	22758	2155	1951 976
FBtr0344183	FBgn0266377	Pde8-RK	310	-26.77	158	-13.98	22759	2155	1951 976
FBtr0331728	FBgn0030055	CG12772-RB	310	-20.76	155	-11.75	27619	650	514 533
FBtr0111009	FBgn0000535	eag-RB	309	-19.17	161	-10.4	523	4731	3668 3386
FBtr0073955	FBgn0000535	eag-RA	309	-19.17	161	-10.4	524	4731	3668 3386
FBtr0310016	FBgn0000535	eag-RG	309	-19.17	161	-10.4	527	4731	3668 3386
FBtr0303286	FBgn0000535	eag-RD	309	-19.17	161	-10.4	529	4731	3668 3386
FBtr0290320	FBgn0042693	PP2A-B'-RJ	309	-29.77	155	-15.19	13709	559	520 152
FBtr0336467	FBgn0042693	PP2A-B'-RQ	309	-29.77	155	-15.19	13716	559	520 152
FBtr0331983	FBgn0053988	Mid1-RB	309	-25.09	160	-14.04	16306	3966	270 412
FBtr0342859	FBgn0085387	shakB-RI	309	-26.64	155	-14.35	16880	11510	7925 6616
FBtr0309370	FBgn0085387	shakB-RH	309	-26.64	155	-14.35	16887	11510	7925 6616
FBtr0304933	FBgn0261553	CG42671-RG	309	-26.45	169	-14.31	18991	902	297 607
FBtr0304934	FBgn0261553	CG42671-RH	309	-26.45	169	-14.31	18992	902	297 607
FBtr0339906	FBgn0261553	CG42671-RJ	309	-26.45	169	-14.31	18993	1779	297 607
FBtr0332270	FBgn0031294	IA-2-RE	309	-22.67	160	-13.41	29214	2532	2108 2455
FBtr0301416	FBgn0031294	IA-2-RC	309	-22.67	160	-13.41	29215	2532	2108 2455
FBtr0310005	FBgn0260943	Rbp6-RE	308	-21.73	159	-11.27	18610	6760	448 2129
FBtr0333861	FBgn0260943	Rbp6-RG	308	-21.73	159	-11.27	18616	6893	448 2129
FBtr0339781	FBgn0029768	SPR-RB	308	-26	158	-15.09	27253	1751	1530 1488
FBtr0334659	FBgn0037636	CG9821-RC	307	-30.28	158	-17.43	8518	4373	3853 1564
FBtr0082693	FBgn0038100	Paip2-RA	307	-22.29	159	-13	9050	1248	603 401
FBtr0305201	FBgn0262593	Shab-RA	307	-24.81	156	-12.62	19790	914	444 126
FBtr0305202	FBgn0262593	Shab-RB	307	-24.81	156	-12.62	19791	914	444 126
FBtr0305203	FBgn0262593	Shab-RC	307	-24.81	156	-12.62	19792	994	524 206
FBtr0305208	FBgn0262593	Shab-RJ	307	-24.81	156	-12.62	19796	914	444 126
FBtr0305209	FBgn0262593	Shab-RL	307	-24.81	156	-12.62	19797	914	444 126
FBtr0332220	FBgn0004242	Syt1-RG	306	-21.91	154	-12.35	11396	5419	4472 848
FBtr0086136	FBgn0010482	l(2)01289-RA	306	-24.4	159	-13.72	20414	1446	655 240
FBtr0301420	FBgn0010482	l(2)01289-RG	306	-24.4	159	-13.72	20416	1463	672 257
FBtr0308841	FBgn0010482	l(2)01289-RL	306	-24.4	159	-13.72	20421	1446	655 240
FBtr0308842	FBgn0010482	l(2)01289-RM	306	-24.4	159	-13.72	20422	1446	655 240
FBtr0330355	FBgn0264001	bru-3-RM	305	-25.87	153	-14.06	21698	4898	872 61
FBtr0330345	FBgn0264001	bru-3-RI	305	-25.87	153	-14.06	21701	1950	872 61
FBtr0330351	FBgn0264001	bru-3-RH	305	-25.87	153	-14.06	21707	8845	872 61
FBtr0330352	FBgn0264001	bru-3-RE	305	-25.87	153	-14.06	21708	3020	872 61
FBtr0330353	FBgn0264001	bru-3-RG	305	-25.87	153	-14.06	21709	3020	872 61
FBtr0346347	FBgn0015778	rin-RG	305	-24.04	156	-12.9	23850	2961	2409 2024
FBtr0079773	FBgn0032100	CG13108-RA	304	-19.19	157	-12.43	1841	206	52 6
FBtr0307030	FBgn0004838	Hrb27C-RF	304	-24.3	154	-13.51	11730	3220	3124 169
FBtr0071503	FBgn0052676	CG32676-RA	304	-21.86	157	-13.48	15589	1284	1227 165
FBtr0333017	FBgn0052676	CG32676-RB	304	-21.86	157	-13.48	15590	3236	1227 165
FBtr0306578	FBgn0013342	nSyb-RI	304	-23.77	157	-15.33	21021	2636	174 198
FBtr0083671	FBgn0015323	VAChT-RA	304	-20.19	152	-12.09	23651	4370	1236 2344
FBtr0088558	FBgn0033403	CG13739-RA	303	-22.12	154	-11.74	3431	3698	2922 2983
FBtr0332996	FBgn0033405	CG13954-RC	303	-22.12	154	-11.74	3433	3325	2549 2610
FBtr0332997	FBgn0033405	CG13954-RD	303	-22.12	154	-11.74	3434	3325	2549 2610
FBtr0070704	FBgn0011760	ctp-RB	303	-19.33	154	-10.93	20882	998	322 187
FBtr0070706	FBgn0011760	ctp-RA	303	-19.33	154	-10.93	20883	998	322 187
FBtr0070707	FBgn0011760	ctp-RC	303	-19.33	154	-10.93	20884	3576	322 187
FBtr0307065	FBgn0011760	ctp-RE	303	-19.33	154	-10.93	20885	3576	322 187
FBtr0340486	FBgn0265626	CG44434-RA	303	-23.11	160	-12.68	22543	2426	629 833
FBtr0079851	FBgn0000273	Pka-C1-RB	302	-22.86	155	-13.88	305	3202	158 1241
FBtr0079852	FBgn0000273	Pka-C1-RC	302	-22.86	155	-13.88	306	3202	158 1241
FBtr0335495	FBgn0000273	Pka-C1-RD	302	-22.86	155	-13.88	307	2155	158 1241
FBtr0084988	FBgn0051323	CG31323-RA	302	-22.28	155	-11.39	14614	2695	2118 273
FBtr0085059	FBgn0262473	Tl-RB	302	-26.98	156	-13.73	19639	1256	604 884
FBtr0330154	FBgn0262473	Tl-RC	302	-26.98	156	-13.73	19640	1196	544 824
FBtr0330311	FBgn0010113	hdc-RD	302	-26.74	154	-15	20148	11842	5338 4702
FBtr0345387	FBgn0036734	CG7564-RD	301	-26.79	152	-13.96	7360	9010	141 6227
FBtr0084148	FBgn0038917	CG6678-RA	301	-28.78	154	-14.47	9966	1243	1044 496
FBtr0074677	FBgn0040068	Vav-RA	301	-26.62	152	-15.16	12880	511	1 428
FBtr0074678	FBgn0040068	Vav-RB	301	-26.62	152	-15.16	12881	1702	1 428
FBtr0113316	FBgn0040068	Vav-RC	301	-26.62	152	-15.16	12882	511	1 428
FBtr0333759	FBgn0040068	Vav-RD	301	-26.62	152	-15.16	12883	511	1 428
FBtr0345689	FBgn0264574	Glut1-RY	301	-23.48	155	-15.17	22063	5077	1332 3652
FBtr0345690	FBgn0264574	Glut1-RZ	301	-23.48	155	-15.17	22064	5077	1332 3652
FBtr0331516	FBgn0264305	CG43783-RA	300	-23.48	154	-14.92	21876	828	730 431
FBtr0331517	FBgn0264305	CG43783-RB	300	-23.48	154	-14.92	21877	828	730 431
FBtr0331518	FBgn0264305	CG43783-RF	300	-23.48	154	-14.92	21878	828	730 431
FBtr0331519	FBgn0264305	CG43783-RG	300	-23.48	154	-14.92	21879	828	730 431
FBtr0083998	FBgn0013995	Calx-RA	300	-26.02	150	-16	23364	2019	707 1838
FBtr0309205	FBgn0013995	Calx-RG	300	-26.02	150	-16	23370	2518	707 1838
FBtr0344316	FBgn0013995	Calx-RH	300	-26.02	150	-16	23371	2518	707 1838
FBtr0344317	FBgn0013995	Calx-RI	300	-26.02	150	-16	23372	4826	3015 4146
FBtr0344145	FBgn0001235	hth-RI	299	-18.77	150	-10.7	898	4262	1028 2515
FBtr0083204	FBgn0013334	Sap47-RA	299	-26.22	150	-13.25	21006	2572	1262 664
FBtr0083206	FBgn0013334	Sap47-RC	299	-26.22	150	-13.25	21008	2572	1262 664
FBtr0083207	FBgn0013334	Sap47-RD	299	-26.22	150	-13.25	21009	2572	1262 664
FBtr0083208	FBgn0013334	Sap47-RE	299	-26.22	150	-13.25	21010	2572	1262 664
FBtr0083210	FBgn0013334	Sap47-RG	299	-26.22	150	-13.25	21012	2572	1262 664
FBtr0301655	FBgn0013334	Sap47-RI	299	-26.22	150	-13.25	21013	3126	1816 1218
FBtr0344384	FBgn0013334	Sap47-RK	299	-26.22	150	-13.25	21014	3218	1908 1310
FBtr0330304	FBgn0264324	spg-RE	299	-22.29	159	-15.25	21891	821	699 684
FBtr0336766	FBgn0264324	spg-RH	299	-22.29	159	-15.25	21894	1376	1254 1239
FBtr0342945	FBgn0020414	Idgf3-RD	299	-19.37	152	-10.85	24392	2345	1770 972
FBtr0332569	FBgn0031298	Atg4a-RB	299	-23.92	153	-12.23	29221	2509	462 1116
FBtr0079348	FBgn0004838	Hrb27C-RB	298	-25.25	154	-13.51	11729	4186	708 3735
FBtr0332934	FBgn0264503	CG43902-RA	298	-17.1	151	-8.83	22018	2418	174 1734
FBtr0077497	FBgn0021800	Reph-RA	298	-22.11	152	-11.3	24573	2430	1219 1198
FBtr0071843	FBgn0022986	qkr58E-1-RA	298	-17.87	149	-9.31	24718	278	27 51
FBtr0346637	FBgn0022986	qkr58E-1-RD	298	-17.87	149	-9.31	24720	639	27 51
FBtr0083912	FBgn0023097	bon-RA	298	-19.37	154	-10.39	24757	1704	1330 311
FBtr0330043	FBgn0023097	bon-RC	298	-19.37	154	-10.39	24759	1482	1108 89
FBtr0334637	FBgn0023097	bon-RD	298	-19.37	154	-10.39	24760	1704	1330 311
FBtr0334638	FBgn0023097	bon-RE	298	-19.37	154	-10.39	24761	1704	1330 311
FBtr0334639	FBgn0023097	bon-RF	298	-19.37	154	-10.39	24762	1704	1330 311
FBtr0075282	FBgn0036697	rogdi-RB	297	-23.8	156	-14.35	7310	1088	270 996
FBtr0075283	FBgn0036697	rogdi-RA	297	-23.8	156	-14.35	7311	1088	270 996
FBtr0334897	FBgn0085391	CG34362-RF	297	-23.15	154	-11.67	16899	5306	1973 1369
FBtr0333756	FBgn0011837	Tis11-RC	297	-21.19	153	-10.67	20945	3314	3113 2755
FBtr0086994	FBgn0265487	mbl-RD	297	-17.87	150	-8.98	22487	5609	376 2141
FBtr0083991	FBgn0027493	AdSS-RA	297	-24.43	149	-13.21	26061	473	128 100
FBtr0333066	FBgn0040765	luna-RC	296	-27.33	152	-15.52	13294	5342	4008 5266
FBtr0083752	FBgn0261285	Ppcs-RA	296	-24.38	149	-14.3	18809	2542	1189 2279
FBtr0330044	FBgn0261285	Ppcs-RC	296	-24.38	149	-14.3	18810	2362	1009 2099
FBtr0085788	FBgn0261988	Gprk2-RA	296	-19.03	151	-10.68	19487	1407	1108 1141
FBtr0346536	FBgn0016694	Pdp1-RP	296	-23.33	151	-14.72	24031	4411	1298 2442
FBtr0306535	FBgn0016694	Pdp1-RK	296	-23.33	151	-14.72	24032	4868	1298 2442
FBtr0301950	FBgn0029761	SK-RJ	296	-26.36	152	-15.12	27233	514	122 48
FBtr0331605	FBgn0262656	dm-RB	295	-24.23	149	-13.23	19847	6385	2341 3475
FBtr0306205	FBgn0262869	Gfrl-RK	295	-22.17	151	-11.78	20022	883	19 1
FBtr0344019	FBgn0015546	spel1-RF	295	-19.91	153	-10.29	23723	1219	515 354
FBtr0309281	FBgn0015546	spel1-RD	295	-19.91	153	-10.29	23724	1610	906 745
FBtr0084121	FBgn0013984	InR-RA	294	-18.24	147	-10.45	23356	3143	2009 2319
FBtr0290230	FBgn0013984	InR-RB	294	-18.24	147	-10.45	23357	3143	2009 2319
FBtr0290231	FBgn0013984	InR-RC	294	-18.24	147	-10.45	23358	3143	2009 2319
FBtr0290232	FBgn0013984	InR-RD	294	-18.24	147	-10.45	23359	3143	2009 2319
FBtr0305049	FBgn0039431	plum-RD	293	-27.09	147	-14.85	12122	2901	2489 1582
FBtr0333223	FBgn0011817	nmo-RH	293	-26.42	147	-14.91	20922	4224	2836 154
FBtr0075648	FBgn0014002	Pdi-RA	293	-23.62	148	-12.82	23376	450	41 67
FBtr0346644	FBgn0014002	Pdi-RE	293	-23.62	148	-12.82	23377	450	41 67
FBtr0088857	FBgn0027548	nito-RA	293	-21.33	147	-11.06	26131	1404	1368 559
FBtr0332961	FBgn0030243	CG2186-RB	293	-23.37	149	-12.28	27805	3463	2059 2958
FBtr0072729	FBgn0035204	CG2277-RA	292	-24.89	146	-12.47	5530	396	198 325
FBtr0345006	FBgn0035204	CG2277-RC	292	-24.89	146	-12.47	5531	396	198 325
FBtr0331867	FBgn0035204	CG2277-RB	292	-24.89	146	-12.47	5532	834	198 325
FBtr0344155	FBgn0023510	Rbcn-3B-RB	292	-19.04	152	-10.99	24851	1491	625 874
FBtr0333159	FBgn0030970	CG7326-RB	292	-23.42	147	-13.25	28764	1037	822 927
FBtr0075139	FBgn0001134	Grd-RA	291	-23.35	146	-12.03	799	1090	54 1030
FBtr0081331	FBgn0045064	bwa-RA	291	-20.24	150	-10.34	13862	1047	603 847
FBtr0077174	FBgn0052423	shep-RB	291	-20.75	150	-11.16	15371	5828	191 3073
FBtr0333288	FBgn0052423	shep-RH	291	-20.75	150	-11.16	15373	5792	155 3037
FBtr0308859	FBgn0052423	shep-RF	291	-20.75	150	-11.16	15376	3705	155 3037
FBtr0307313	FBgn0263111	cac-RG	291	-25.14	151	-14.36	21186	2340	523 266
FBtr0307314	FBgn0263111	cac-RH	291	-25.14	151	-14.36	21187	2340	523 266
FBtr0307315	FBgn0263111	cac-RI	291	-25.14	151	-14.36	21188	4765	523 266
FBtr0307316	FBgn0263111	cac-RJ	291	-25.14	151	-14.36	21189	2340	523 266
FBtr0307317	FBgn0263111	cac-RC	291	-25.14	151	-14.36	21190	4498	523 266
FBtr0307318	FBgn0263111	cac-RA	291	-25.14	151	-14.36	21191	2340	523 266
FBtr0307319	FBgn0263111	cac-RD	291	-25.14	151	-14.36	21192	2340	523 266
FBtr0307320	FBgn0263111	cac-RF	291	-25.14	151	-14.36	21193	4498	523 266
FBtr0307321	FBgn0263111	cac-RB	291	-25.14	151	-14.36	21194	2340	523 266
FBtr0307322	FBgn0263111	cac-RE	291	-25.14	151	-14.36	21195	2340	523 266
FBtr0307323	FBgn0263111	cac-RL	291	-25.14	151	-14.36	21196	2340	523 266
FBtr0307324	FBgn0263111	cac-RM	291	-25.14	151	-14.36	21197	2340	523 266
FBtr0307325	FBgn0263111	cac-RN	291	-25.14	151	-14.36	21198	4193	523 266
FBtr0308609	FBgn0263111	cac-RO	291	-25.14	151	-14.36	21199	2340	523 266
FBtr0110882	FBgn0031374	CG7337-RB	291	-19.83	151	-11.3	29296	974	822 917
FBtr0110883	FBgn0031374	CG7337-RC	291	-19.83	151	-11.3	29297	982	822 917
FBtr0113011	FBgn0031374	CG7337-RD	291	-19.83	151	-11.3	29298	1324	822 917
FBtr0304856	FBgn0262475	bru-2-RE	290	-19.32	149	-9.75	19642	964	57 671
FBtr0304858	FBgn0262475	bru-2-RA	290	-19.32	149	-9.75	19643	1557	650 1264
FBtr0304859	FBgn0262475	bru-2-RD	290	-19.32	149	-9.75	19644	964	57 671
FBtr0304861	FBgn0262475	bru-2-RH	290	-19.32	149	-9.75	19646	964	57 671
FBtr0304862	FBgn0262475	bru-2-RG	290	-19.32	149	-9.75	19647	1620	713 1327
FBtr0304863	FBgn0262475	bru-2-RI	290	-19.32	149	-9.75	19648	964	57 671
FBtr0304864	FBgn0262475	bru-2-RJ	290	-19.32	149	-9.75	19649	964	57 671
FBtr0332232	FBgn0262475	bru-2-RK	290	-19.32	149	-9.75	19650	964	57 671
FBtr0332233	FBgn0262475	bru-2-RL	290	-19.32	149	-9.75	19651	964	57 671
FBtr0332234	FBgn0262475	bru-2-RM	290	-19.32	149	-9.75	19652	1620	713 1327
FBtr0344777	FBgn0028863	CG4587-RL	290	-22.07	150	-11.15	26815	3652	2804 3525
FBtr0344778	FBgn0028863	CG4587-RM	290	-22.07	150	-11.15	26816	3652	2804 3525
FBtr0303562	FBgn0000210	br-RL	289	-18.99	146	-9.95	233	7430	3658 1129
FBtr0303679	FBgn0264255	para-RAC	288	-21.16	147	-13.58	21802	4921	2694 455
FBtr0303687	FBgn0264255	para-RAK	288	-21.16	147	-13.58	21824	4921	2694 455
FBtr0342746	FBgn0264255	para-RBG	288	-21.16	147	-13.58	21825	8761	2694 455
FBtr0081930	FBgn0037637	CG9836-RA	287	-20.3	144	-10.61	8520	384	48 28
FBtr0089661	FBgn0003380	Sh-RC	287	-19.29	147	-10.38	10836	7861	1184 7008
FBtr0077530	FBgn0024244	drm-RB	287	-22	147	-13.54	24977	1668	1051 838
FBtr0077531	FBgn0024244	drm-RA	287	-22	147	-13.54	24978	1326	1051 838
FBtr0344768	FBgn0024244	drm-RC	287	-22	147	-13.54	24979	774	499 286
FBtr0075471	FBgn0036597	CG4962-RA	286	-19.77	146	-10.25	7201	338	170 189
FBtr0302702	FBgn0261554	CG42672-RL	286	-24.81	146	-13.23	18996	437	13 329
FBtr0302703	FBgn0261554	CG42672-RF	286	-24.81	146	-13.23	18997	437	13 329
FBtr0302704	FBgn0261554	CG42672-RG	286	-24.81	146	-13.23	18998	437	13 329
FBtr0344188	FBgn0261554	CG42672-RO	286	-24.81	146	-13.23	19004	437	13 329
FBtr0334612	FBgn0038975	Nrx-1-RH	284	-20.02	143	-12.58	10036	2823	1830 2048
FBtr0345228	FBgn0038975	Nrx-1-RI	284	-20.02	143	-12.58	10037	3113	1830 2048
FBtr0342807	FBgn0267911	trol-RAG	284	-20.25	144	-12.54	23204	1109	595 754
FBtr0088414	FBgn0004907	14-3-3zeta-RD	283	-17.04	143	-10.14	11840	2065	1 604
FBtr0088415	FBgn0004907	14-3-3zeta-RE	283	-17.04	143	-10.14	11841	2065	1 604
FBtr0088412	FBgn0004907	14-3-3zeta-RB	283	-17.04	143	-10.14	11842	2065	1 604
FBtr0088416	FBgn0004907	14-3-3zeta-RF	283	-17.04	143	-10.14	11843	852	1 604
FBtr0088418	FBgn0004907	14-3-3zeta-RH	283	-17.04	143	-10.14	11844	2065	1 604
FBtr0088419	FBgn0004907	14-3-3zeta-RC	283	-17.04	143	-10.14	11845	2065	1 604
FBtr0088417	FBgn0004907	14-3-3zeta-RG	283	-17.04	143	-10.14	11846	2065	1 604
FBtr0088413	FBgn0004907	14-3-3zeta-RA	283	-17.04	143	-10.14	11847	852	1 604
FBtr0100183	FBgn0004907	14-3-3zeta-RJ	283	-17.04	143	-10.14	11849	852	1 604
FBtr0332916	FBgn0004907	14-3-3zeta-RK	283	-17.04	143	-10.14	11850	2065	1 604
FBtr0332917	FBgn0004907	14-3-3zeta-RL	283	-17.04	143	-10.14	11851	852	1 604
FBtr0076970	FBgn0042185	CG18769-RA	283	-18.77	142	-10.38	13669	2219	1925 775
FBtr0332968	FBgn0051687	CG31687-RC	283	-21.51	143	-11.38	14863	5564	1739 4130
FBtr0330661	FBgn0263355	CG31688-RG	283	-21.65	143	-11.52	21390	6048	2178 4565
FBtr0304684	FBgn0267790	rump-RB	281	-17.27	141	-8.8	23168	1406	633 683
FBtr0110984	FBgn0260451	CG14042-RB	280	-18.34	140	-9.66	18322	1993	138 1193
FBtr0342701	FBgn0034520	lms-RB	180	-22.42	180	-22.42	4770	333	111
FBtr0342702	FBgn0034520	lms-RC	180	-22.42	180	-22.42	4771	812	111
FBtr0083650	FBgn0004652	fru-RK	176	-19.82	176	-19.82	11660	3922	461
FBtr0083640	FBgn0004652	fru-RH	176	-19.82	176	-19.82	11663	3922	461
FBtr0083645	FBgn0004652	fru-RG	176	-19.82	176	-19.82	11668	3922	461
FBtr0079699	FBgn0032048	Dh31-RA	174	-17.51	174	-17.51	1777	799	655
FBtr0079700	FBgn0032048	Dh31-RC	174	-17.51	174	-17.51	1778	799	655
FBtr0346729	FBgn0266801	CG45263-RG	172	-13.71	172	-13.71	22999	5815	4370
FBtr0345460	FBgn0266801	CG45263-RE	172	-13.71	172	-13.71	23003	2320	875
FBtr0074349	FBgn0030798	CG13003-RA	172	-15.96	172	-15.96	28556	1004	807
FBtr0300431	FBgn0030798	CG13003-RB	172	-15.96	172	-15.96	28557	1004	807
FBtr0331739	FBgn0030798	CG13003-RC	172	-15.96	172	-15.96	28558	1004	807
FBtr0084402	FBgn0004395	unk-RA	171	-18.4	171	-18.4	11462	2376	846
FBtr0084403	FBgn0004395	unk-RB	171	-18.4	171	-18.4	11463	898	846
FBtr0305571	FBgn0004395	unk-RC	171	-18.4	171	-18.4	11464	1848	846
FBtr0305572	FBgn0004395	unk-RD	171	-18.4	171	-18.4	11465	1848	846
FBtr0332557	FBgn0264442	ab-RB	171	-14.64	171	-14.64	21942	1398	821
FBtr0332558	FBgn0264442	ab-RA	171	-14.64	171	-14.64	21943	1670	821
FBtr0332560	FBgn0264442	ab-RD	171	-14.64	171	-14.64	21944	1398	821
FBtr0332562	FBgn0264442	ab-RF	171	-14.64	171	-14.64	21946	1398	821
FBtr0072433	FBgn0035060	Eps-15-RC	170	-16.15	170	-16.15	5350	367	245
FBtr0072434	FBgn0035060	Eps-15-RB	170	-16.15	170	-16.15	5351	367	245
FBtr0072435	FBgn0035060	Eps-15-RA	170	-16.15	170	-16.15	5352	367	245
FBtr0078173	FBgn0036974	eRF1-RC	170	-17.74	170	-17.74	7680	238	45
FBtr0078174	FBgn0036974	eRF1-RB	170	-17.74	170	-17.74	7681	238	45
FBtr0078175	FBgn0036974	eRF1-RE	170	-17.74	170	-17.74	7682	238	45
FBtr0078176	FBgn0036974	eRF1-RF	170	-17.74	170	-17.74	7683	238	45
FBtr0078177	FBgn0036974	eRF1-RA	170	-17.74	170	-17.74	7684	238	45
FBtr0078178	FBgn0036974	eRF1-RG	170	-17.74	170	-17.74	7685	238	45
FBtr0083646	FBgn0004652	fru-RA	170	-20.3	170	-20.3	11669	3344	48
FBtr0334025	FBgn0053207	pxb-RC	170	-16.94	170	-16.94	15947	2577	2433
FBtr0333927	FBgn0083963	CG34127-RC	170	-14.32	170	-14.32	16613	1963	930
FBtr0301072	FBgn0083963	CG34127-RB	170	-14.32	170	-14.32	16614	953	930
FBtr0308837	FBgn0263397	Ih-RM	170	-17.79	170	-17.79	21427	3132	1517
FBtr0076982	FBgn0004619	GluRIA-RA	169	-20.44	169	-20.44	11617	296	211
FBtr0330283	FBgn0261553	CG42671-RI	169	-14.31	169	-14.31	18985	804	264
FBtr0302696	FBgn0261553	CG42671-RB	169	-14.31	169	-14.31	18987	837	297
FBtr0302697	FBgn0261553	CG42671-RC	169	-14.31	169	-14.31	18988	837	297
FBtr0302699	FBgn0261553	CG42671-RE	169	-14.31	169	-14.31	18990	837	297
FBtr0076906	FBgn0035734	CG14823-RB	168	-13.49	168	-13.49	6191	553	71
FBtr0076908	FBgn0035734	CG14823-RD	168	-13.49	168	-13.49	6192	648	166
FBtr0078204	FBgn0052425	CG32425-RB	168	-17.56	168	-17.56	15379	265	84
FBtr0113436	FBgn0052425	CG32425-RF	168	-17.56	168	-17.56	15381	265	84
FBtr0112368	FBgn0085206	CG34177-RA	168	-16.6	168	-16.6	16687	506	138
FBtr0347106	FBgn0267652	pre-mod(mdg4)-N-RA	168	-16.14	168	-16.14	23147	1494	501
FBtr0070918	FBgn0029874	CG3342-RA	168	-17.27	168	-17.27	27377	262	161
FBtr0300019	FBgn0029962	CG1402-RB	168	-15.17	168	-15.17	27501	329	74
FBtr0072578	FBgn0000575	emc-RA	167	-17.94	167	-17.94	601	1185	312
FBtr0345137	FBgn0035495	CG14989-RF	167	-13.7	167	-13.7	5911	641	348
FBtr0308362	FBgn0035495	CG14989-RD	167	-13.7	167	-13.7	5913	641	348
FBtr0308363	FBgn0035495	CG14989-RE	167	-13.7	167	-13.7	5914	2045	348
FBtr0309793	FBgn0011826	Pp2B-14D-RC	167	-18.17	167	-18.17	20930	3068	2108
FBtr0305593	FBgn0011826	Pp2B-14D-RB	167	-18.17	167	-18.17	20931	2229	2108
FBtr0333305	FBgn0000711	flw-RC	166	-19.66	166	-19.66	690	2338	1011
FBtr0087597	FBgn0002643	mam-RB	166	-12.78	166	-12.78	1198	2442	1506
FBtr0339956	FBgn0002643	mam-RD	166	-12.78	166	-12.78	1200	2442	1506
FBtr0076785	FBgn0023076	Clk-RA	166	-13.21	166	-13.21	24734	980	783
FBtr0334648	FBgn0023076	Clk-RH	166	-13.21	166	-13.21	24738	980	783
FBtr0082804	FBgn0004587	B52-RF	165	-13	165	-13	11570	3368	1827
FBtr0300586	FBgn0004587	B52-RI	165	-13	165	-13	11573	3001	1460
FBtr0300588	FBgn0004587	B52-RK	165	-13	165	-13	11574	3368	1827
FBtr0071610	FBgn0000395	cv-2-RA	164	-13.81	164	-13.81	406	991	778
FBtr0071320	FBgn0002576	lz-RA	164	-21.35	164	-21.35	1162	765	603
FBtr0112814	FBgn0002576	lz-RB	164	-21.35	164	-21.35	1163	765	603
FBtr0306003	FBgn0033673	CG8298-RC	164	-15.74	164	-15.74	3753	1068	956
FBtr0078559	FBgn0037205	BoYb-RA	164	-12.82	164	-12.82	7995	287	21
FBtr0085163	FBgn0039508	CG3368-RA	164	-14.31	164	-14.31	12211	133	59
FBtr0303151	FBgn0042106	CG18754-RB	164	-13.73	164	-13.73	13619	661	639
FBtr0343041	FBgn0052677	X11Lbeta-RD	164	-15.06	164	-15.06	15592	1788	1521
FBtr0079356	FBgn0264922	smt3-RA	164	-13.94	164	-13.94	22250	248	17
FBtr0346716	FBgn0264922	smt3-RB	164	-13.94	164	-13.94	22251	248	17
FBtr0329911	FBgn0265991	Zasp52-RQ	164	-18.61	164	-18.61	22606	628	289
FBtr0329912	FBgn0265991	Zasp52-RR	164	-18.61	164	-18.61	22607	628	289
FBtr0329913	FBgn0265991	Zasp52-RS	164	-18.61	164	-18.61	22608	628	289
FBtr0329914	FBgn0265991	Zasp52-RT	164	-18.61	164	-18.61	22609	628	289
FBtr0329915	FBgn0265991	Zasp52-RU	164	-18.61	164	-18.61	22610	628	289
FBtr0087315	FBgn0265991	Zasp52-RC	164	-18.61	164	-18.61	22611	628	289
FBtr0100387	FBgn0265991	Zasp52-RE	164	-18.61	164	-18.61	22612	628	289
FBtr0100388	FBgn0265991	Zasp52-RF	164	-18.61	164	-18.61	22613	628	289
FBtr0111048	FBgn0265991	Zasp52-RG	164	-18.61	164	-18.61	22614	628	289
FBtr0301313	FBgn0265991	Zasp52-RI	164	-18.61	164	-18.61	22615	628	289
FBtr0310086	FBgn0265991	Zasp52-RL	164	-18.61	164	-18.61	22617	628	289
FBtr0310087	FBgn0265991	Zasp52-RM	164	-18.61	164	-18.61	22618	628	289
FBtr0310088	FBgn0265991	Zasp52-RN	164	-18.61	164	-18.61	22619	628	289
FBtr0329916	FBgn0265991	Zasp52-RV	164	-18.61	164	-18.61	22622	628	289
FBtr0342711	FBgn0265991	Zasp52-RW	164	-18.61	164	-18.61	22623	628	289
FBtr0077083	FBgn0029121	Sras-RA	164	-12.32	164	-12.32	26989	275	212
FBtr0078383	FBgn0029152	Mkrn1-RA	164	-13.45	164	-13.45	27008	1510	450
FBtr0078384	FBgn0029152	Mkrn1-RB	164	-13.45	164	-13.45	27009	863	450
FBtr0305331	FBgn0029152	Mkrn1-RC	164	-13.45	164	-13.45	27010	863	450
FBtr0073643	FBgn0030384	CG2577-RA	164	-12.61	164	-12.61	28000	169	72
FBtr0081225	FBgn0032768	CG17564-RB	163	-19.45	163	-19.45	2612	91	44
FBtr0073308	FBgn0035557	CG11353-RA	163	-13.07	163	-13.07	6001	272	60
FBtr0073309	FBgn0035557	CG11353-RB	163	-13.07	163	-13.07	6002	272	60
FBtr0076396	FBgn0036032	CG16711-RB	163	-20	163	-20	6539	1728	546
FBtr0075938	FBgn0036317	CG10948-RB	163	-12.93	163	-12.93	6872	1401	1040
FBtr0075939	FBgn0036317	CG10948-RC	163	-12.93	163	-12.93	6873	407	46
FBtr0273237	FBgn0036317	CG10948-RD	163	-12.93	163	-12.93	6874	407	46
FBtr0331862	FBgn0036897	CG8786-RG	163	-18.65	163	-18.65	7576	2366	944
FBtr0081853	FBgn0037583	CG9684-RA	163	-12.6	163	-12.6	8456	137	20
FBtr0333065	FBgn0086677	jeb-RB	163	-17.73	163	-17.73	17296	7415	2481
FBtr0299965	FBgn0259712	CG42366-RA	163	-13.22	163	-13.22	18005	429	308
FBtr0331633	FBgn0259712	CG42366-RB	163	-13.22	163	-13.22	18006	266	145
FBtr0087974	FBgn0260012	pds5-RA	163	-14.23	163	-14.23	18235	744	141
FBtr0306062	FBgn0260012	pds5-RB	163	-14.23	163	-14.23	18236	744	141
FBtr0076086	FBgn0015278	Pi3K68D-RB	163	-14.34	163	-14.34	23623	574	64
FBtr0332055	FBgn0015278	Pi3K68D-RE	163	-14.34	163	-14.34	23625	574	64
FBtr0339940	FBgn0000633	fas-RB	162	-17	162	-17	645	2656	150
FBtr0087625	FBgn0000633	fas-RA	162	-17	162	-17	646	2656	150
FBtr0329944	FBgn0032600	CG17912-RE	162	-9.04	162	-9.04	2416	4277	1307
FBtr0329945	FBgn0032600	CG17912-RF	162	-9.04	162	-9.04	2417	4097	1127
FBtr0308802	FBgn0032600	CG17912-RC	162	-9.04	162	-9.04	2419	2586	1307
FBtr0308803	FBgn0032600	CG17912-RD	162	-9.04	162	-9.04	2420	4277	1307
FBtr0273392	FBgn0036757	Ir75a-RB	162	-14.35	162	-14.35	7384	92	13
FBtr0084743	FBgn0039223	CG5805-RA	162	-13.76	162	-13.76	10339	659	449
FBtr0339255	FBgn0039223	CG5805-RB	162	-13.76	162	-13.76	10340	844	449
FBtr0304114	FBgn0051721	Trim9-RB	162	-10.91	162	-10.91	14913	1072	819
FBtr0332953	FBgn0261710	nocte-RD	162	-9.02	162	-9.02	19235	2588	1032
FBtr0340142	FBgn0261873	sdt-RP	162	-12.98	162	-12.98	19407	2028	1361
FBtr0089978	FBgn0261873	sdt-RB	162	-12.98	162	-12.98	19408	2028	1361
FBtr0089974	FBgn0261873	sdt-RE	162	-12.98	162	-12.98	19413	2028	1361
FBtr0333720	FBgn0261873	sdt-RM	162	-12.98	162	-12.98	19418	2028	1361
FBtr0307309	FBgn0263110	CG43367-RC	162	-15.71	162	-15.71	21182	1411	514
FBtr0307310	FBgn0263110	CG43367-RD	162	-15.71	162	-15.71	21183	1411	514
FBtr0307311	FBgn0263110	CG43367-RE	162	-15.71	162	-15.71	21184	1411	514
FBtr0307312	FBgn0263110	CG43367-RF	162	-15.71	162	-15.71	21185	1411	514
FBtr0309980	FBgn0263621	CG43630-RA	162	-11.88	162	-11.88	21508	100	73
FBtr0074351	FBgn0030797	CG13004-RA	162	-12.61	162	-12.61	28552	718	590
FBtr0112996	FBgn0030797	CG13004-RB	162	-12.61	162	-12.61	28554	718	590
FBtr0308682	FBgn0030797	CG13004-RD	162	-12.61	162	-12.61	28555	718	590
FBtr0088001	FBgn0000253	Cam-RA	161	-16.59	161	-16.59	277	831	426
FBtr0345018	FBgn0000253	Cam-RE	161	-16.59	161	-16.59	279	831	426
FBtr0304963	FBgn0000253	Cam-RC	161	-16.59	161	-16.59	280	5015	426
FBtr0304964	FBgn0000253	Cam-RD	161	-16.59	161	-16.59	281	2827	426
FBtr0082052	FBgn0000723	FER-RA	161	-10.65	161	-10.65	707	638	534
FBtr0082053	FBgn0000723	FER-RC	161	-10.65	161	-10.65	708	638	534
FBtr0082054	FBgn0000723	FER-RD	161	-10.65	161	-10.65	709	638	534
FBtr0082051	FBgn0000723	FER-RB	161	-10.65	161	-10.65	710	638	534
FBtr0333295	FBgn0000723	FER-RE	161	-10.65	161	-10.65	711	638	534
FBtr0333296	FBgn0000723	FER-RF	161	-10.65	161	-10.65	712	638	534
FBtr0073489	FBgn0001624	dlg1-RG	161	-11.03	161	-11.03	993	1573	140
FBtr0073490	FBgn0001624	dlg1-RH	161	-11.03	161	-11.03	994	1573	140
FBtr0073488	FBgn0001624	dlg1-RB	161	-11.03	161	-11.03	995	1573	140
FBtr0073487	FBgn0001624	dlg1-RE	161	-11.03	161	-11.03	997	1573	140
FBtr0073485	FBgn0001624	dlg1-RD	161	-11.03	161	-11.03	998	1573	140
FBtr0073486	FBgn0001624	dlg1-RA	161	-11.03	161	-11.03	999	1573	140
FBtr0112812	FBgn0001624	dlg1-RK	161	-11.03	161	-11.03	1002	3598	140
FBtr0112813	FBgn0001624	dlg1-RL	161	-11.03	161	-11.03	1003	3598	140
FBtr0301289	FBgn0001624	dlg1-RN	161	-11.03	161	-11.03	1005	1573	140
FBtr0330390	FBgn0001624	dlg1-RR	161	-11.03	161	-11.03	1006	1450	17
FBtr0308088	FBgn0001624	dlg1-RP	161	-11.03	161	-11.03	1008	1807	140
FBtr0308089	FBgn0001624	dlg1-RQ	161	-11.03	161	-11.03	1009	2160	140
FBtr0333261	FBgn0001624	dlg1-RS	161	-11.03	161	-11.03	1010	2160	140
FBtr0333262	FBgn0001624	dlg1-RT	161	-11.03	161	-11.03	1011	3598	140
FBtr0079401	FBgn0031885	Mnn1-RA	161	-13.75	161	-13.75	1545	944	546
FBtr0087093	FBgn0034135	Syn2-RA	161	-15.53	161	-15.53	4307	1757	949
FBtr0087094	FBgn0034135	Syn2-RB	161	-15.53	161	-15.53	4308	1757	949
FBtr0334644	FBgn0035816	CG13685-RC	161	-13.81	161	-13.81	6286	2186	1643
FBtr0076201	FBgn0036116	CG7888-RB	161	-15.67	161	-15.67	6626	409	118
FBtr0076199	FBgn0036116	CG7888-RC	161	-15.67	161	-15.67	6627	409	118
FBtr0076200	FBgn0036116	CG7888-RA	161	-15.67	161	-15.67	6628	409	118
FBtr0074837	FBgn0036967	CG6597-RA	161	-10.52	161	-10.52	7672	368	344
FBtr0074838	FBgn0036967	CG6597-RB	161	-10.52	161	-10.52	7673	685	344
FBtr0344228	FBgn0036967	CG6597-RE	161	-10.52	161	-10.52	7674	368	344
FBtr0332775	FBgn0036967	CG6597-RD	161	-10.52	161	-10.52	7675	685	344
FBtr0112544	FBgn0085370	Pde11-RB	161	-13.49	161	-13.49	16850	607	364
FBtr0112545	FBgn0085370	Pde11-RC	161	-13.49	161	-13.49	16851	607	364
FBtr0343830	FBgn0085370	Pde11-RF	161	-13.49	161	-13.49	16852	1310	364
FBtr0343831	FBgn0085370	Pde11-RG	161	-13.49	161	-13.49	16853	607	364
FBtr0303162	FBgn0085370	Pde11-RD	161	-13.49	161	-13.49	16854	1403	1160
FBtr0303163	FBgn0085370	Pde11-RE	161	-13.49	161	-13.49	16855	2106	1160
FBtr0112653	FBgn0085430	CG34401-RA	161	-12.61	161	-12.61	16998	2515	2087
FBtr0333160	FBgn0085430	CG34401-RB	161	-12.61	161	-12.61	16999	5954	2087
FBtr0304994	FBgn0262579	Ect4-RE	161	-18.39	161	-18.39	19772	1395	148
FBtr0083564	FBgn0011701	repo-RA	161	-12.59	161	-12.59	20835	852	730
FBtr0306847	FBgn0263005	CG43313-RA	161	-14.83	161	-14.83	21078	702	571
FBtr0308653	FBgn0029881	pigs-RB	161	-14.77	161	-14.77	27386	2602	1799
FBtr0343375	FBgn0029881	pigs-RC	161	-14.77	161	-14.77	27387	2602	1799
FBtr0346268	FBgn0030304	Cyp4g15-RC	161	-12.42	161	-12.42	27881	372	275
FBtr0073778	FBgn0030484	GstT4-RA	161	-17.98	161	-17.98	28116	288	70
FBtr0076495	FBgn0001227	Hsp67Ba-RA	160	-14.17	160	-14.17	885	300	211
FBtr0343624	FBgn0032330	Samuel-RD	160	-17.86	160	-17.86	2120	69	25
FBtr0347160	FBgn0032330	Samuel-RE	160	-17.86	160	-17.86	2121	69	25
FBtr0081336	FBgn0032850	Kua-RA	160	-9.99	160	-9.99	2736	859	526
FBtr0331617	FBgn0032850	Kua-RD	160	-9.99	160	-9.99	2738	859	526
FBtr0089102	FBgn0039916	CG9935-RA	160	-12.52	160	-12.52	12740	925	505
FBtr0307388	FBgn0040832	CG8012-RB	160	-14.62	160	-14.62	13339	380	181
FBtr0081310	FBgn0044811	TotF-RA	160	-11.53	160	-11.53	13846	83	33
FBtr0075630	FBgn0047338	CG32148-RA	160	-13.64	160	-13.64	13980	130	10
FBtr0302517	FBgn0053144	CG33144-RB	160	-11.13	160	-11.13	15866	875	818
FBtr0339592	FBgn0053513	Nmdar2-RG	160	-16.95	160	-16.95	16074	2924	1810
FBtr0100033	FBgn0053988	Mid1-RA	160	-14.04	160	-14.04	16305	399	270
FBtr0332385	FBgn0259162	RunxB-RC	160	-12.3	160	-12.3	17700	1084	229
FBtr0343995	FBgn0262733	Src64B-RK	160	-16.12	160	-16.12	19886	1746	532
FBtr0304990	FBgn0262733	Src64B-RJ	160	-16.12	160	-16.12	19889	2194	532
FBtr0304989	FBgn0262733	Src64B-RI	160	-16.12	160	-16.12	19892	1746	532
FBtr0088447	FBgn0011656	Mef2-RF	160	-14.51	160	-14.51	20783	3250	2960
FBtr0088445	FBgn0011656	Mef2-RC	160	-14.51	160	-14.51	20786	3250	2960
FBtr0073265	FBgn0264693	ens-RB	160	-15.97	160	-15.97	22093	1283	379
FBtr0310635	FBgn0264693	ens-RI	160	-15.97	160	-15.97	22094	1283	379
FBtr0310637	FBgn0264693	ens-RK	160	-15.97	160	-15.97	22095	1283	379
FBtr0073266	FBgn0264693	ens-RA	160	-15.97	160	-15.97	22096	1283	379
FBtr0310633	FBgn0264693	ens-RG	160	-15.97	160	-15.97	22097	1283	379
FBtr0073269	FBgn0264693	ens-RE	160	-15.97	160	-15.97	22098	1698	379
FBtr0113135	FBgn0264693	ens-RF	160	-15.97	160	-15.97	22099	1283	379
FBtr0073267	FBgn0264693	ens-RC	160	-15.97	160	-15.97	22100	1283	379
FBtr0310636	FBgn0264693	ens-RJ	160	-15.97	160	-15.97	22101	1283	379
FBtr0073268	FBgn0264693	ens-RD	160	-15.97	160	-15.97	22102	1283	379
FBtr0310634	FBgn0264693	ens-RH	160	-15.97	160	-15.97	22103	1283	379
FBtr0345589	FBgn0264693	ens-RL	160	-15.97	160	-15.97	22104	1929	379
FBtr0299551	FBgn0265296	Dscam2-RJ	160	-14.3	160	-14.3	22430	3229	3171
FBtr0339133	FBgn0265296	Dscam2-RQ	160	-14.3	160	-14.3	22436	2158	2100
FBtr0343753	FBgn0266174	pre-mod(mdg4)-L-RA	160	-13.25	160	-13.25	22710	2173	1090
FBtr0343754	FBgn0266175	pre-mod(mdg4)-P-RA	160	-13.25	160	-13.25	22711	1748	665
FBtr0343757	FBgn0266176	pre-mod(mdg4)-J-RA	160	-13.25	160	-13.25	22712	1286	269
FBtr0071171	FBgn0030030	CG1636-RA	160	-13.35	160	-13.35	27576	839	353
FBtr0339833	FBgn0030030	CG1636-RB	160	-13.35	160	-13.35	27577	1088	353
FBtr0080282	FBgn0032385	CG16964-RA	159	-13.75	159	-13.75	2181	157	93
FBtr0342579	FBgn0032385	CG16964-RB	159	-13.75	159	-13.75	2182	337	93
FBtr0346464	FBgn0032938	CG8671-RG	159	-14.19	159	-14.19	2851	1276	1109
FBtr0087930	FBgn0033739	Dyb-RC	159	-17.64	159	-17.64	3827	928	674
FBtr0087929	FBgn0033739	Dyb-RA	159	-17.64	159	-17.64	3828	928	674
FBtr0100298	FBgn0033739	Dyb-RD	159	-17.64	159	-17.64	3829	876	622
FBtr0308613	FBgn0033739	Dyb-RI	159	-17.64	159	-17.64	3830	876	622
FBtr0305077	FBgn0033739	Dyb-RH	159	-17.64	159	-17.64	3831	876	622
FBtr0087409	FBgn0033987	ckn-RC	159	-11.37	159	-11.37	4129	899	632
FBtr0087411	FBgn0033987	ckn-RB	159	-11.37	159	-11.37	4130	899	632
FBtr0339987	FBgn0033987	ckn-RD	159	-11.37	159	-11.37	4131	899	632
FBtr0345946	FBgn0033987	ckn-RE	159	-11.37	159	-11.37	4132	1110	632
FBtr0345947	FBgn0033987	ckn-RF	159	-11.37	159	-11.37	4133	1110	632
FBtr0075065	FBgn0036822	NijB-RA	159	-15.17	159	-15.17	7476	195	2
FBtr0113214	FBgn0037755	CG12945-RB	159	-11.58	159	-11.58	8684	578	439
FBtr0334685	FBgn0037755	CG12945-RC	159	-11.58	159	-11.58	8685	578	439
FBtr0347361	FBgn0037755	CG12945-RD	159	-11.58	159	-11.58	8686	1614	439
FBtr0083547	FBgn0038568	CG14315-RA	159	-11.84	159	-11.84	9566	48	8
FBtr0083608	FBgn0038586	CG7168-RA	159	-13.6	159	-13.6	9586	74	44
FBtr0089717	FBgn0003118	pnt-RB	159	-18.59	159	-18.59	10611	1134	670
FBtr0334554	FBgn0003118	pnt-RE	159	-18.59	159	-18.59	10614	1134	670
FBtr0072867	FBgn0004636	R-RA	159	-13.31	159	-13.31	11626	1542	427
FBtr0303154	FBgn0004636	R-RB	159	-13.31	159	-13.31	11627	1542	427
FBtr0332671	FBgn0004636	R-RC	159	-13.31	159	-13.31	11628	1542	427
FBtr0081317	FBgn0004811	fs(2)ltoPP43-RB	159	-13.04	159	-13.04	11718	1039	525
FBtr0332246	FBgn0004811	fs(2)ltoPP43-RC	159	-13.04	159	-13.04	11719	655	266
FBtr0089350	FBgn0005630	lola-RI	159	-14.82	159	-14.82	11989	924	73
FBtr0343132	FBgn0005630	lola-RAA	159	-14.82	159	-14.82	12011	1104	73
FBtr0334339	FBgn0039663	CG2321-RB	159	-9.69	159	-9.69	12365	1458	1161
FBtr0087601	FBgn0040752	Prosap-RA	159	-8.78	159	-8.78	13281	827	596
FBtr0339763	FBgn0040752	Prosap-RC	159	-8.78	159	-8.78	13282	827	596
FBtr0339764	FBgn0040752	Prosap-RD	159	-8.78	159	-8.78	13283	1870	596
FBtr0339765	FBgn0040752	Prosap-RE	159	-8.78	159	-8.78	13284	827	596
FBtr0113361	FBgn0050118	CG30118-RC	159	-10.63	159	-10.63	14081	515	451
FBtr0114575	FBgn0260499	qvr-RB	159	-8.1	159	-8.1	18378	3854	2195
FBtr0339545	FBgn0260499	qvr-RC	159	-8.1	159	-8.1	18379	3854	2195
FBtr0308954	FBgn0263352	Unr-RC	159	-14.2	159	-14.2	21377	2147	1445
FBtr0345595	FBgn0263352	Unr-RE	159	-14.2	159	-14.2	21379	2147	1445
FBtr0086503	FBgn0263395	hppy-RB	159	-9.35	159	-9.35	21417	1054	379
FBtr0086504	FBgn0263395	hppy-RA	159	-9.35	159	-9.35	21418	1054	379
FBtr0340454	FBgn0263395	hppy-RC	159	-9.35	159	-9.35	21419	1054	379
FBtr0340455	FBgn0263395	hppy-RD	159	-9.35	159	-9.35	21420	1054	379
FBtr0340456	FBgn0263395	hppy-RE	159	-9.35	159	-9.35	21421	1054	379
FBtr0333475	FBgn0026206	mei-P26-RD	159	-16.47	159	-16.47	25648	4375	1907
FBtr0081327	FBgn0032840	sNPF-RB	158	-11.77	158	-11.77	2725	1150	926
FBtr0300945	FBgn0033638	CG9005-RB	158	-11.14	158	-11.14	3717	1366	965
FBtr0306029	FBgn0033638	CG9005-RC	158	-11.14	158	-11.14	3718	995	965
FBtr0087242	FBgn0034087	clu-RA	158	-15.53	158	-15.53	4262	1210	1006
FBtr0333169	FBgn0034087	clu-RB	158	-15.53	158	-15.53	4263	1210	1006
FBtr0086336	FBgn0034476	Toll-7-RA	158	-15.19	158	-15.19	4710	1728	1594
FBtr0072583	FBgn0035165	CG13887-RC	158	-12.31	158	-12.31	5490	315	128
FBtr0072584	FBgn0035165	CG13887-RB	158	-12.31	158	-12.31	5491	315	128
FBtr0304797	FBgn0035165	CG13887-RD	158	-12.31	158	-12.31	5492	594	407
FBtr0345588	FBgn0035165	CG13887-RE	158	-12.31	158	-12.31	5493	499	128
FBtr0113210	FBgn0037737	Pnn-RB	158	-10.77	158	-10.77	8659	625	30
FBtr0082174	FBgn0037780	CG3925-RA	158	-10.33	158	-10.33	8709	206	87
FBtr0077157	FBgn0004380	Klp64D-RA	158	-10.96	158	-10.96	11448	357	248
FBtr0334533	FBgn0039647	CG14509-RD	158	-12.45	158	-12.45	12353	2544	1772
FBtr0334534	FBgn0039647	CG14509-RE	158	-12.45	158	-12.45	12354	2928	2156
FBtr0306016	FBgn0040297	Nhe2-RI	158	-14.61	158	-14.61	12990	2430	1190
FBtr0299912	FBgn0040297	Nhe2-RG	158	-14.61	158	-14.61	12995	1729	489
FBtr0076459	FBgn0040305	MTF-1-RA	158	-12.62	158	-12.62	13004	789	496
FBtr0076460	FBgn0040305	MTF-1-RB	158	-12.62	158	-12.62	13005	789	496
FBtr0113322	FBgn0040305	MTF-1-RC	158	-12.62	158	-12.62	13006	789	496
FBtr0113323	FBgn0040305	MTF-1-RD	158	-12.62	158	-12.62	13007	789	496
FBtr0113324	FBgn0040305	MTF-1-RE	158	-12.62	158	-12.62	13008	782	496
FBtr0344237	FBgn0040305	MTF-1-RG	158	-12.62	158	-12.62	13010	789	496
FBtr0088718	FBgn0040777	CG14767-RA	158	-12.65	158	-12.65	13300	677	226
FBtr0088719	FBgn0040777	CG14767-RC	158	-12.65	158	-12.65	13301	677	226
FBtr0088720	FBgn0040777	CG14767-RB	158	-12.65	158	-12.65	13302	677	226
FBtr0082177	FBgn0041105	nerfin-2-RA	158	-15.01	158	-15.01	13431	308	227
FBtr0344296	FBgn0085383	CG34354-RF	158	-14.6	158	-14.6	16867	1447	976
FBtr0304916	FBgn0085383	CG34354-RE	158	-14.6	158	-14.6	16868	2752	985
FBtr0304917	FBgn0085383	CG34354-RD	158	-14.6	158	-14.6	16869	1456	985
FBtr0346762	FBgn0085383	CG34354-RG	158	-14.6	158	-14.6	16870	1447	976
FBtr0112624	FBgn0085412	CG34383-RE	158	-12.08	158	-12.08	16937	1854	534
FBtr0329898	FBgn0085412	CG34383-RH	158	-12.08	158	-12.08	16940	2404	1084
FBtr0334568	FBgn0085412	CG34383-RK	158	-12.08	158	-12.08	16943	2414	1094
FBtr0073748	FBgn0010303	hep-RC	158	-18.92	158	-18.92	20242	601	500
FBtr0330397	FBgn0010303	hep-RE	158	-18.92	158	-18.92	20245	3552	970
FBtr0083226	FBgn0010379	Akt1-RB	158	-11.19	158	-11.19	20308	1401	322
FBtr0083227	FBgn0010379	Akt1-RA	158	-11.19	158	-11.19	20309	1401	322
FBtr0083228	FBgn0010379	Akt1-RC	158	-11.19	158	-11.19	20310	1401	322
FBtr0344470	FBgn0010379	Akt1-RD	158	-11.19	158	-11.19	20311	1401	322
FBtr0344717	FBgn0010379	Akt1-RE	158	-11.19	158	-11.19	20312	2556	322
FBtr0079051	FBgn0010607	l(2)05714-RB	158	-9.52	158	-9.52	20476	77	34
FBtr0079050	FBgn0010607	l(2)05714-RA	158	-9.52	158	-9.52	20477	77	34
FBtr0331229	FBgn0010607	l(2)05714-RC	158	-9.52	158	-9.52	20478	77	34
FBtr0084568	FBgn0011725	twin-RE	158	-17.08	158	-17.08	20852	1543	896
FBtr0331500	FBgn0264297	CG43775-RA	158	-15.6	158	-15.6	21865	2061	1159
FBtr0343439	FBgn0264298	CG43776-RB	158	-15.6	158	-15.6	21866	1093	191
FBtr0331501	FBgn0264298	CG43776-RA	158	-15.6	158	-15.6	21867	1093	191
FBtr0334150	FBgn0264775	CG44013-RC	158	-11.27	158	-11.27	22176	262	79
FBtr0335169	FBgn0264978	Slh-RG	158	-14.95	158	-14.95	22283	2149	437
FBtr0302890	FBgn0265263	CG42688-RA	158	-12.77	158	-12.77	22400	62	10
FBtr0332576	FBgn0265263	CG42688-RB	158	-12.77	158	-12.77	22401	288	10
FBtr0074176	FBgn0014391	sun-RA	158	-14.01	158	-14.01	23484	120	22
FBtr0074177	FBgn0014391	sun-RB	158	-14.01	158	-14.01	23485	182	84
FBtr0084011	FBgn0015790	Rab11-RB	158	-13.32	158	-13.32	23853	762	57
FBtr0084010	FBgn0015790	Rab11-RA	158	-13.32	158	-13.32	23854	762	57
FBtr0072226	FBgn0025352	Thiolase-RA	158	-12.49	158	-12.49	25232	105	54
FBtr0078582	FBgn0027339	jim-RC	158	-14.08	158	-14.08	26010	8679	7168
FBtr0304985	FBgn0027339	jim-RE	158	-14.08	158	-14.08	26016	8679	7168
FBtr0073723	FBgn0030451	CG15717-RA	158	-16.09	158	-16.09	28070	313	162
FBtr0344608	FBgn0030451	CG15717-RE	158	-16.09	158	-16.09	28072	313	162
FBtr0074072	FBgn0030654	CG15643-RA	158	-16.06	158	-16.06	28322	569	234
FBtr0340349	FBgn0030654	CG15643-RB	158	-16.06	158	-16.06	28323	288	234
FBtr0077957	FBgn0031306	CG4577-RA	158	-14.54	158	-14.54	29228	1032	347
FBtr0332271	FBgn0031306	CG4577-RB	158	-14.54	158	-14.54	29229	1200	347
FBtr0079233	FBgn0000308	chic-RA	157	-14.01	157	-14.01	343	374	52
FBtr0079234	FBgn0000308	chic-RC	157	-14.01	157	-14.01	344	677	52
FBtr0079235	FBgn0000308	chic-RB	157	-14.01	157	-14.01	345	677	52
FBtr0079236	FBgn0000308	chic-RD	157	-14.01	157	-14.01	346	1462	52
FBtr0309212	FBgn0000308	chic-RE	157	-14.01	157	-14.01	347	253	52
FBtr0309213	FBgn0000308	chic-RF	157	-14.01	157	-14.01	348	570	52
FBtr0080889	FBgn0000409	Cyt-c-p-RA	157	-15.17	157	-15.17	415	268	88
FBtr0344849	FBgn0000409	Cyt-c-p-RB	157	-15.17	157	-15.17	416	268	88
FBtr0079100	FBgn0002525	Lam-RA	157	-12.46	157	-12.46	1123	1134	1032
FBtr0307058	FBgn0002525	Lam-RB	157	-12.46	157	-12.46	1124	1134	1032
FBtr0307059	FBgn0002525	Lam-RC	157	-12.46	157	-12.46	1125	1134	1032
FBtr0346460	FBgn0002525	Lam-RD	157	-12.46	157	-12.46	1126	1134	1032
FBtr0081222	FBgn0032773	fon-RB	157	-14.7	157	-14.7	2620	472	235
FBtr0087633	FBgn0033872	CG6329-RA	157	-8.11	157	-8.11	3986	1895	1627
FBtr0339950	FBgn0033872	CG6329-RE	157	-8.11	157	-8.11	3990	2484	1627
FBtr0113154	FBgn0035880	CG17352-RE	157	-11.21	157	-11.21	6352	2589	553
FBtr0076621	FBgn0035903	CG6765-RA	157	-13.34	157	-13.34	6369	956	695
FBtr0333054	FBgn0035903	CG6765-RB	157	-13.34	157	-13.34	6370	1080	695
FBtr0333055	FBgn0035903	CG6765-RC	157	-13.34	157	-13.34	6371	1184	923
FBtr0074963	FBgn0036896	wnd-RA	157	-10.74	157	-10.74	7569	1142	476
FBtr0074964	FBgn0036896	wnd-RB	157	-10.74	157	-10.74	7570	1142	476
FBtr0074965	FBgn0036896	wnd-RC	157	-10.74	157	-10.74	7571	1142	476
FBtr0305052	FBgn0038197	foxo-RF	157	-11.68	157	-11.68	9161	1290	637
FBtr0082886	FBgn0038197	foxo-RB	157	-11.68	157	-11.68	9162	1290	637
FBtr0082887	FBgn0038197	foxo-RC	157	-11.68	157	-11.68	9163	1290	637
FBtr0337094	FBgn0038197	foxo-RG	157	-11.68	157	-11.68	9164	1290	637
FBtr0346723	FBgn0038197	foxo-RH	157	-11.68	157	-11.68	9165	1290	637
FBtr0083698	FBgn0038659	EndoA-RA	157	-14.72	157	-14.72	9669	1972	1037
FBtr0083699	FBgn0038659	EndoA-RB	157	-14.72	157	-14.72	9670	1972	1037
FBtr0334522	FBgn0038659	EndoA-RC	157	-14.72	157	-14.72	9671	2324	982
FBtr0089660	FBgn0003380	Sh-RD	157	-10.01	157	-10.01	10835	452	387
FBtr0346703	FBgn0003380	Sh-RQ	157	-10.01	157	-10.01	10847	452	387
FBtr0346704	FBgn0003380	Sh-RR	157	-10.01	157	-10.01	10848	452	387
FBtr0346705	FBgn0003380	Sh-RS	157	-10.01	157	-10.01	10849	670	387
FBtr0346323	FBgn0051235	CG31235-RB	157	-10.81	157	-10.81	14568	1149	545
FBtr0072985	FBgn0052485	CG32485-RA	157	-14.88	157	-14.88	15437	251	170
FBtr0110808	FBgn0083950	CG34114-RB	157	-15.07	157	-15.07	16597	1975	776
FBtr0301576	FBgn0085360	CG34331-RB	157	-15.39	157	-15.39	16841	242	45
FBtr0308589	FBgn0085390	Dgk-RH	157	-15.92	157	-15.92	16892	2011	1765
FBtr0306738	FBgn0086675	fne-RC	157	-13.65	157	-13.65	17281	4240	1183
FBtr0306739	FBgn0086675	fne-RD	157	-13.65	157	-13.65	17282	4927	1183
FBtr0113493	FBgn0086675	fne-RB	157	-13.65	157	-13.65	17284	4927	1183
FBtr0343650	FBgn0086675	fne-RI	157	-13.65	157	-13.65	17285	4927	1183
FBtr0343651	FBgn0086675	fne-RJ	157	-13.65	157	-13.65	17286	4927	1183
FBtr0333319	FBgn0086675	fne-RG	157	-13.65	157	-13.65	17287	4927	1183
FBtr0333320	FBgn0086675	fne-RH	157	-13.65	157	-13.65	17288	4927	1183
FBtr0304726	FBgn0259685	crb-RC	157	-10.23	157	-10.23	17980	662	569
FBtr0078571	FBgn0010348	Arf79F-RA	157	-13.29	157	-13.29	20279	574	19
FBtr0078573	FBgn0010348	Arf79F-RB	157	-13.29	157	-13.29	20280	574	19
FBtr0078574	FBgn0010348	Arf79F-RE	157	-13.29	157	-13.29	20281	574	19
FBtr0078575	FBgn0010348	Arf79F-RC	157	-13.29	157	-13.29	20282	574	19
FBtr0112858	FBgn0010348	Arf79F-RF	157	-13.29	157	-13.29	20283	574	19
FBtr0299906	FBgn0010348	Arf79F-RH	157	-13.29	157	-13.29	20284	702	19
FBtr0299907	FBgn0010348	Arf79F-RI	157	-13.29	157	-13.29	20285	574	19
FBtr0332054	FBgn0010348	Arf79F-RJ	157	-13.29	157	-13.29	20286	574	19
FBtr0300603	FBgn0263197	Patronin-RF	157	-10.08	157	-10.08	21244	746	696
FBtr0273447	FBgn0263197	Patronin-RE	157	-10.08	157	-10.08	21246	746	696
FBtr0273446	FBgn0263197	Patronin-RD	157	-10.08	157	-10.08	21247	1411	696
FBtr0086950	FBgn0263197	Patronin-RC	157	-10.08	157	-10.08	21249	746	696
FBtr0332260	FBgn0263197	Patronin-RI	157	-10.08	157	-10.08	21250	746	696
FBtr0332261	FBgn0263197	Patronin-RJ	157	-10.08	157	-10.08	21251	746	696
FBtr0332262	FBgn0263197	Patronin-RK	157	-10.08	157	-10.08	21252	746	696
FBtr0332263	FBgn0263197	Patronin-RL	157	-10.08	157	-10.08	21253	746	696
FBtr0332264	FBgn0263197	Patronin-RM	157	-10.08	157	-10.08	21254	746	696
FBtr0332265	FBgn0263197	Patronin-RN	157	-10.08	157	-10.08	21255	1411	696
FBtr0332266	FBgn0263197	Patronin-RO	157	-10.08	157	-10.08	21256	746	696
FBtr0310494	FBgn0263772	CG43689-RG	157	-14.88	157	-14.88	21552	1427	451
FBtr0310495	FBgn0263772	CG43689-RE	157	-14.88	157	-14.88	21553	1427	451
FBtr0339681	FBgn0263772	CG43689-RH	157	-14.88	157	-14.88	21554	1511	451
FBtr0100146	FBgn0264607	CaMKII-RD	157	-12.01	157	-12.01	22078	1990	1144
FBtr0100147	FBgn0264607	CaMKII-RE	157	-12.01	157	-12.01	22079	1990	1144
FBtr0100148	FBgn0264607	CaMKII-RG	157	-12.01	157	-12.01	22080	1990	1144
FBtr0089218	FBgn0264607	CaMKII-RA	157	-12.01	157	-12.01	22081	1990	1144
FBtr0089217	FBgn0264607	CaMKII-RC	157	-12.01	157	-12.01	22082	1990	1144
FBtr0300378	FBgn0264607	CaMKII-RI	157	-12.01	157	-12.01	22084	1990	1144
FBtr0089219	FBgn0264607	CaMKII-RB	157	-12.01	157	-12.01	22085	1990	1144
FBtr0333673	FBgn0264607	CaMKII-RK	157	-12.01	157	-12.01	22087	1990	1144
FBtr0333674	FBgn0264607	CaMKII-RL	157	-12.01	157	-12.01	22088	1990	1144
FBtr0333675	FBgn0264607	CaMKII-RM	157	-12.01	157	-12.01	22089	1990	1144
FBtr0334851	FBgn0264894	CG44085-RC	157	-11.71	157	-11.71	22207	859	462
FBtr0334852	FBgn0264894	CG44085-RD	157	-11.71	157	-11.71	22208	660	263
FBtr0334853	FBgn0264894	CG44085-RH	157	-11.71	157	-11.71	22209	660	263
FBtr0334854	FBgn0264894	CG44085-RF	157	-11.71	157	-11.71	22210	660	263
FBtr0334855	FBgn0264894	CG44085-RG	157	-11.71	157	-11.71	22211	660	263
FBtr0334856	FBgn0264894	CG44085-RM	157	-11.71	157	-11.71	22212	660	263
FBtr0334857	FBgn0264894	CG44085-RI	157	-11.71	157	-11.71	22213	660	263
FBtr0334858	FBgn0264894	CG44085-RJ	157	-11.71	157	-11.71	22214	660	263
FBtr0334859	FBgn0264894	CG44085-RK	157	-11.71	157	-11.71	22215	660	263
FBtr0334860	FBgn0264894	CG44085-RL	157	-11.71	157	-11.71	22216	660	263
FBtr0334861	FBgn0264894	CG44085-RN	157	-11.71	157	-11.71	22217	660	263
FBtr0334862	FBgn0264894	CG44085-RO	157	-11.71	157	-11.71	22218	1402	1005
FBtr0334863	FBgn0264894	CG44085-RP	157	-11.71	157	-11.71	22219	1402	1005
FBtr0344359	FBgn0266409	CG45049-RB	157	-15.09	157	-15.09	22762	2255	1173
FBtr0344360	FBgn0266409	CG45049-RC	157	-15.09	157	-15.09	22763	2255	1173
FBtr0344361	FBgn0266409	CG45049-RE	157	-15.09	157	-15.09	22764	2255	1173
FBtr0086543	FBgn0020440	Fak-RB	157	-10.79	157	-10.79	24398	447	294
FBtr0086544	FBgn0020440	Fak-RC	157	-10.79	157	-10.79	24399	447	294
FBtr0086542	FBgn0020440	Fak-RA	157	-10.79	157	-10.79	24400	447	294
FBtr0301882	FBgn0020440	Fak-RF	157	-10.79	157	-10.79	24401	447	294
FBtr0301883	FBgn0020440	Fak-RG	157	-10.79	157	-10.79	24402	447	294
FBtr0114605	FBgn0020440	Fak-RD	157	-10.79	157	-10.79	24403	447	294
FBtr0079865	FBgn0022720	zf30C-RA	157	-10.65	157	-10.65	24674	234	73
FBtr0073844	FBgn0030512	CG9940-RB	157	-17.22	157	-17.22	28159	1429	1049
FBtr0073845	FBgn0030512	CG9940-RA	157	-17.22	157	-17.22	28160	1256	1049
FBtr0343352	FBgn0030512	CG9940-RC	157	-17.22	157	-17.22	28161	1256	1049
FBtr0089320	FBgn0000529	bsh-RB	156	-14.88	156	-14.88	519	584	56
FBtr0086170	FBgn0033122	CG17002-RB	156	-13.24	156	-13.24	3038	154	112
FBtr0303225	FBgn0033122	CG17002-RC	156	-13.24	156	-13.24	3039	154	112
FBtr0303226	FBgn0033122	CG17002-RD	156	-13.24	156	-13.24	3040	154	112
FBtr0089023	FBgn0033127	Tsp42Ef-RA	156	-13.51	156	-13.51	3042	309	206
FBtr0071749	FBgn0034681	CG9308-RA	156	-17.17	156	-17.17	4923	134	80
FBtr0075388	FBgn0036627	Grp-RA	156	-13.99	156	-13.99	7237	334	273
FBtr0343534	FBgn0036627	Grp-RB	156	-13.99	156	-13.99	7238	872	273
FBtr0070537	FBgn0003086	Pig1-RB	156	-11.88	156	-11.88	10577	115	6
FBtr0332461	FBgn0003174	pwn-RB	156	-13.24	156	-13.24	10661	404	168
FBtr0332462	FBgn0003174	pwn-RC	156	-13.24	156	-13.24	10662	404	168
FBtr0070432	FBgn0004861	ph-p-RA	156	-10.19	156	-10.19	11758	599	419
FBtr0301515	FBgn0004861	ph-p-RB	156	-10.19	156	-10.19	11759	599	419
FBtr0343589	FBgn0004861	ph-p-RC	156	-10.19	156	-10.19	11760	599	419
FBtr0345598	FBgn0004861	ph-p-RD	156	-10.19	156	-10.19	11761	599	419
FBtr0081261	FBgn0005590	scw-RA	156	-11.65	156	-11.65	11958	93	55
FBtr0343860	FBgn0005590	scw-RB	156	-11.65	156	-11.65	11959	341	55
FBtr0085758	FBgn0039831	CG12054-RA	156	-14.75	156	-14.75	12606	649	215
FBtr0086215	FBgn0050154	CG30154-RA	156	-9.73	156	-9.73	14091	279	60
FBtr0273308	FBgn0050263	stum-RB	156	-12.86	156	-12.86	14124	187	2
FBtr0347184	FBgn0050263	stum-RD	156	-12.86	156	-12.86	14125	187	2
FBtr0347185	FBgn0050263	stum-RE	156	-12.86	156	-12.86	14126	187	2
FBtr0085124	FBgn0051064	CG31064-RA	156	-12.07	156	-12.07	14409	796	402
FBtr0085126	FBgn0051064	CG31064-RE	156	-12.07	156	-12.07	14411	891	402
FBtr0339248	FBgn0051064	CG31064-RF	156	-12.07	156	-12.07	14412	891	402
FBtr0083762	FBgn0051221	CG31221-RA	156	-10.69	156	-10.69	14553	3044	1654
FBtr0330030	FBgn0051221	CG31221-RC	156	-10.69	156	-10.69	14555	2939	1549
FBtr0082689	FBgn0051345	CG31345-RA	156	-10.08	156	-10.08	14626	200	74
FBtr0310542	FBgn0051992	gw-RI	156	-12.89	156	-12.89	15097	1216	453
FBtr0290328	FBgn0250908	beat-VII-RD	156	-11.14	156	-11.14	17642	4052	1794
FBtr0081647	FBgn0260642	Antp-RM	156	-13.05	156	-13.05	18396	2035	1265
FBtr0081648	FBgn0260642	Antp-RD	156	-13.05	156	-13.05	18397	2035	1265
FBtr0081649	FBgn0260642	Antp-RG	156	-13.05	156	-13.05	18398	2035	1265
FBtr0081650	FBgn0260642	Antp-RE	156	-13.05	156	-13.05	18399	2035	1265
FBtr0081651	FBgn0260642	Antp-RN	156	-13.05	156	-13.05	18400	2035	1265
FBtr0081652	FBgn0260642	Antp-RL	156	-13.05	156	-13.05	18401	2035	1265
FBtr0081653	FBgn0260642	Antp-RF	156	-13.05	156	-13.05	18402	2035	1265
FBtr0081656	FBgn0260642	Antp-RK	156	-13.05	156	-13.05	18405	2035	1265
FBtr0330155	FBgn0262473	Tl-RD	156	-13.73	156	-13.73	19641	768	604
FBtr0309109	FBgn0263391	hts-RL	156	-10.78	156	-10.78	21403	1357	668
FBtr0309110	FBgn0263391	hts-RM	156	-10.78	156	-10.78	21404	1357	668
FBtr0309112	FBgn0263391	hts-RO	156	-10.78	156	-10.78	21406	1660	668
FBtr0309114	FBgn0263391	hts-RQ	156	-10.78	156	-10.78	21408	1357	668
FBtr0309115	FBgn0263391	hts-RR	156	-10.78	156	-10.78	21409	1660	668
FBtr0340491	FBgn0263391	hts-RS	156	-10.78	156	-10.78	21410	1660	668
FBtr0078087	FBgn0015924	crq-RA	156	-12.31	156	-12.31	23906	767	286
FBtr0331233	FBgn0015924	crq-RE	156	-12.31	156	-12.31	23909	767	286
FBtr0085897	FBgn0023416	Ac3-RA	156	-14.51	156	-14.51	24823	1139	499
FBtr0080590	FBgn0027348	bgm-RA	156	-11.28	156	-11.28	26031	319	131
FBtr0346624	FBgn0027348	bgm-RC	156	-11.28	156	-11.28	26032	319	131
FBtr0080808	FBgn0028645	beat-Ib-RA	156	-15.28	156	-15.28	26673	543	432
FBtr0300615	FBgn0028645	beat-Ib-RB	156	-15.28	156	-15.28	26674	543	432
FBtr0073596	FBgn0030354	Upf1-RA	156	-13.7	156	-13.7	27972	1242	6
FBtr0342744	FBgn0030354	Upf1-RB	156	-13.7	156	-13.7	27973	793	6
FBtr0111024	FBgn0031681	pgant5-RB	156	-11.51	156	-11.51	29685	1713	16
FBtr0079026	FBgn0031681	pgant5-RA	156	-11.51	156	-11.51	29686	1713	16
FBtr0084060	FBgn0002781	mod(mdg4)-RA	155	-11.12	155	-11.12	1251	346	242
FBtr0079631	FBgn0032005	Snx6-RA	155	-15.17	155	-15.17	1702	340	264
FBtr0306170	FBgn0032005	Snx6-RB	155	-15.17	155	-15.17	1703	340	264
FBtr0081442	FBgn0032901	sky-RB	155	-15.03	155	-15.03	2806	2414	1360
FBtr0081443	FBgn0032901	sky-RE	155	-15.03	155	-15.03	2807	2414	1360
FBtr0081444	FBgn0032901	sky-RC	155	-15.03	155	-15.03	2808	2414	1360
FBtr0081446	FBgn0032901	sky-RD	155	-15.03	155	-15.03	2810	2414	1360
FBtr0081447	FBgn0032901	sky-RH	155	-15.03	155	-15.03	2811	2414	1360
FBtr0081440	FBgn0032901	sky-RG	155	-15.03	155	-15.03	2812	2414	1360
FBtr0081441	FBgn0032901	sky-RA	155	-15.03	155	-15.03	2813	2414	1360
FBtr0330255	FBgn0032901	sky-RJ	155	-15.03	155	-15.03	2814	2414	1360
FBtr0330256	FBgn0032901	sky-RK	155	-15.03	155	-15.03	2815	2414	1360
FBtr0330257	FBgn0032901	sky-RL	155	-15.03	155	-15.03	2816	2414	1360
FBtr0301961	FBgn0032901	sky-RI	155	-15.03	155	-15.03	2817	2414	1360
FBtr0088248	FBgn0033554	Lsm10-RA	155	-11.44	155	-11.44	3629	87	40
FBtr0087532	FBgn0033913	CG8468-RC	155	-14.34	155	-14.34	4051	1053	54
FBtr0087533	FBgn0033913	CG8468-RA	155	-14.34	155	-14.34	4052	1053	54
FBtr0087534	FBgn0033913	CG8468-RB	155	-14.34	155	-14.34	4053	1053	54
FBtr0339981	FBgn0033955	CG12866-RD	155	-12.95	155	-12.95	4092	210	51
FBtr0339982	FBgn0033955	CG12866-RE	155	-12.95	155	-12.95	4093	1711	1552
FBtr0300764	FBgn0033955	CG12866-RB	155	-12.95	155	-12.95	4094	210	51
FBtr0300765	FBgn0033955	CG12866-RC	155	-12.95	155	-12.95	4095	210	51
FBtr0345519	FBgn0034200	CG11395-RB	155	-10.76	155	-10.76	4391	856	581
FBtr0071846	FBgn0034720	Liprin-gamma-RA	155	-10.99	155	-10.99	4971	928	13
FBtr0071847	FBgn0034720	Liprin-gamma-RB	155	-10.99	155	-10.99	4972	928	13
FBtr0113106	FBgn0034720	Liprin-gamma-RC	155	-10.99	155	-10.99	4973	928	13
FBtr0342990	FBgn0034720	Liprin-gamma-RE	155	-10.99	155	-10.99	4975	928	13
FBtr0100185	FBgn0035538	DopEcR-RB	155	-15.31	155	-15.31	5969	1512	990
FBtr0100186	FBgn0035538	DopEcR-RC	155	-15.31	155	-15.31	5970	1512	990
FBtr0333368	FBgn0035756	unc-13-4A-RC	155	-13.3	155	-13.3	6211	2954	1322
FBtr0113164	FBgn0036202	CG6024-RC	155	-10.95	155	-10.95	6733	1438	1191
FBtr0332132	FBgn0036202	CG6024-RF	155	-10.95	155	-10.95	6734	3385	1191
FBtr0084579	FBgn0039157	Myo95E-RD	155	-15.26	155	-15.26	10250	1190	780
FBtr0100516	FBgn0039157	Myo95E-RE	155	-15.26	155	-15.26	10251	1190	780
FBtr0100518	FBgn0039157	Myo95E-RG	155	-15.26	155	-15.26	10253	3648	3238
FBtr0084578	FBgn0039157	Myo95E-RB	155	-15.26	155	-15.26	10254	1190	780
FBtr0113289	FBgn0039358	CG5028-RB	155	-10.66	155	-10.66	10516	603	96
FBtr0085826	FBgn0003870	ttk-RF	155	-13.83	155	-13.83	11189	2070	1691
FBtr0085828	FBgn0003870	ttk-RC	155	-13.83	155	-13.83	11191	2070	1691
FBtr0085830	FBgn0003870	ttk-RD	155	-13.83	155	-13.83	11193	2070	1691
FBtr0303228	FBgn0003870	ttk-RH	155	-13.83	155	-13.83	11195	2070	1691
FBtr0082793	FBgn0004049	yrt-RA	155	-12.89	155	-12.89	11280	738	425
FBtr0114374	FBgn0004049	yrt-RB	155	-12.89	155	-12.89	11281	738	425
FBtr0114375	FBgn0004049	yrt-RC	155	-12.89	155	-12.89	11282	738	425
FBtr0114376	FBgn0004049	yrt-RD	155	-12.89	155	-12.89	11283	992	679
FBtr0079525	FBgn0004177	mts-RA	155	-14.54	155	-14.54	11362	862	481
FBtr0343416	FBgn0004177	mts-RB	155	-14.54	155	-14.54	11363	1770	481
FBtr0085422	FBgn0004369	Ptp99A-RA	155	-13.53	155	-13.53	11426	2215	979
FBtr0085424	FBgn0004369	Ptp99A-RC	155	-13.53	155	-13.53	11427	2215	979
FBtr0303148	FBgn0004369	Ptp99A-RF	155	-13.53	155	-13.53	11429	2215	979
FBtr0303454	FBgn0004369	Ptp99A-RG	155	-13.53	155	-13.53	11430	2642	979
FBtr0072516	FBgn0004373	fwd-RA	155	-15.1	155	-15.1	11440	966	865
FBtr0085192	FBgn0039532	Mtl-RB	155	-14.01	155	-14.01	12233	1171	315
FBtr0085193	FBgn0039532	Mtl-RA	155	-14.01	155	-14.01	12234	1171	315
FBtr0085191	FBgn0039532	Mtl-RC	155	-14.01	155	-14.01	12235	395	315
FBtr0079301	FBgn0046704	Liprin-alpha-RB	155	-7.73	155	-7.73	13948	912	617
FBtr0079300	FBgn0046704	Liprin-alpha-RA	155	-7.73	155	-7.73	13949	657	617
FBtr0329941	FBgn0046704	Liprin-alpha-RC	155	-7.73	155	-7.73	13950	2078	617
FBtr0329942	FBgn0046704	Liprin-alpha-RD	155	-7.73	155	-7.73	13951	912	617
FBtr0329943	FBgn0046704	Liprin-alpha-RE	155	-7.73	155	-7.73	13952	618	578
FBtr0085268	FBgn0051053	CG31053-RA	155	-14.11	155	-14.11	14405	140	16
FBtr0076301	FBgn0052056	scramb1-RA	155	-15.22	155	-15.22	15136	588	367
FBtr0076302	FBgn0052056	scramb1-RB	155	-15.22	155	-15.22	15137	590	367
FBtr0076303	FBgn0052056	scramb1-RC	155	-15.22	155	-15.22	15138	588	367
FBtr0081612	FBgn0261238	Alh-RA	155	-10.34	155	-10.34	18728	628	210
FBtr0081613	FBgn0261238	Alh-RD	155	-10.34	155	-10.34	18729	628	210
FBtr0081614	FBgn0261238	Alh-RB	155	-10.34	155	-10.34	18730	628	210
FBtr0113200	FBgn0261238	Alh-RF	155	-10.34	155	-10.34	18731	628	210
FBtr0334672	FBgn0261238	Alh-RK	155	-10.34	155	-10.34	18734	628	210
FBtr0334673	FBgn0261238	Alh-RL	155	-10.34	155	-10.34	18735	628	210
FBtr0334677	FBgn0261238	Alh-RP	155	-10.34	155	-10.34	18739	628	210
FBtr0332930	FBgn0261823	Asx-RD	155	-8.34	155	-8.34	19341	1500	66
FBtr0330258	FBgn0263996	CG43739-RA	155	-15.03	155	-15.03	21685	4387	3333
FBtr0333493	FBgn0264574	Glut1-RM	155	-15.17	155	-15.17	22046	3012	1757
FBtr0333495	FBgn0264574	Glut1-RJ	155	-15.17	155	-15.17	22048	2587	1332
FBtr0333509	FBgn0264574	Glut1-RX	155	-15.17	155	-15.17	22062	2587	1332
FBtr0336473	FBgn0265042	Irk1-RB	155	-13.05	155	-13.05	22301	683	373
FBtr0336474	FBgn0265042	Irk1-RE	155	-13.05	155	-13.05	22302	683	373
FBtr0336475	FBgn0265042	Irk1-RD	155	-13.05	155	-13.05	22303	603	373
FBtr0336476	FBgn0265042	Irk1-RC	155	-13.05	155	-13.05	22304	603	373
FBtr0336477	FBgn0265042	Irk1-RF	155	-13.05	155	-13.05	22305	683	373
FBtr0336478	FBgn0265042	Irk1-RG	155	-13.05	155	-13.05	22306	683	373
FBtr0336479	FBgn0265042	Irk1-RH	155	-13.05	155	-13.05	22307	683	373
FBtr0072398	FBgn0265434	zip-RB	155	-9.92	155	-9.92	22474	567	435
FBtr0334285	FBgn0266756	btsz-RB	155	-12.71	155	-12.71	22978	3088	760
FBtr0334290	FBgn0266756	btsz-RG	155	-12.71	155	-12.71	22983	3088	760
FBtr0334291	FBgn0266756	btsz-RH	155	-12.71	155	-12.71	22984	3088	760
FBtr0334292	FBgn0266756	btsz-RI	155	-12.71	155	-12.71	22985	3088	760
FBtr0334293	FBgn0266756	btsz-RJ	155	-12.71	155	-12.71	22986	3088	760
FBtr0076382	FBgn0267348	LanB2-RA	155	-12.6	155	-12.6	23091	590	15
FBtr0345031	FBgn0267348	LanB2-RB	155	-12.6	155	-12.6	23092	590	15
FBtr0081397	FBgn0014859	Hr38-RB	155	-11.89	155	-11.89	23517	3348	1717
FBtr0301347	FBgn0014859	Hr38-RD	155	-11.89	155	-11.89	23518	3348	1717
FBtr0070425	FBgn0023542	Nmd3-RA	155	-13.53	155	-13.53	24918	95	58
FBtr0070278	FBgn0025378	CG3795-RA	155	-18.14	155	-18.14	25240	151	42
FBtr0344154	FBgn0025378	CG3795-RB	155	-18.14	155	-18.14	25241	283	42
FBtr0070284	FBgn0025390	Mur2B-RA	155	-13.53	155	-13.53	25252	112	57
FBtr0343517	FBgn0025390	Mur2B-RC	155	-13.53	155	-13.53	25253	112	57
FBtr0070151	FBgn0025639	Hmt4-20-RA	155	-16.74	155	-16.74	25357	1567	1313
FBtr0074286	FBgn0026181	Rok-RA	155	-12.98	155	-12.98	25624	1952	281
FBtr0340151	FBgn0026181	Rok-RB	155	-12.98	155	-12.98	25625	1952	281
FBtr0340153	FBgn0026181	Rok-RD	155	-12.98	155	-12.98	25627	1054	281
FBtr0075410	FBgn0027080	Aats-tyr-RA	155	-12.13	155	-12.13	25931	134	27
FBtr0085204	FBgn0027492	wdb-RD	155	-14.82	155	-14.82	26056	3894	2270
FBtr0085208	FBgn0027492	wdb-RC	155	-14.82	155	-14.82	26058	3894	2270
FBtr0085205	FBgn0027492	wdb-RF	155	-14.82	155	-14.82	26060	3894	2270
FBtr0086921	FBgn0028953	CG14478-RA	155	-11.34	155	-11.34	26905	1347	917
FBtr0086922	FBgn0028953	CG14478-RB	155	-11.34	155	-11.34	26906	1347	917
FBtr0345417	FBgn0028953	CG14478-RC	155	-11.34	155	-11.34	26907	1347	917
FBtr0345418	FBgn0028953	CG14478-RD	155	-11.34	155	-11.34	26908	1562	917
FBtr0070890	FBgn0029003	mab-21-RA	155	-11.45	155	-11.45	26957	625	143
FBtr0070991	FBgn0029887	CG3198-RA	155	-12.53	155	-12.53	27390	3444	128
FBtr0336906	FBgn0030164	CG1889-RE	155	-12.63	155	-12.63	27739	818	285
FBtr0074666	FBgn0030991	CG7453-RA	155	-8.18	155	-8.18	28786	831	774
FBtr0074750	FBgn0031057	Ubqn-RA	155	-13.1	155	-13.1	28896	1174	46
FBtr0340612	FBgn0031057	Ubqn-RB	155	-13.1	155	-13.1	28897	1592	46
FBtr0307071	FBgn0031759	lid-RE	155	-12.18	155	-12.18	29816	1179	295
FBtr0345336	FBgn0031759	lid-RF	155	-12.18	155	-12.18	29817	1242	295
FBtr0332101	FBgn0000541	E(bx)-RG	154	-13	154	-13	543	1935	140
FBtr0085832	FBgn0000557	Ef1alpha100E-RA	154	-13.31	154	-13.31	567	1037	466
FBtr0085833	FBgn0000557	Ef1alpha100E-RB	154	-13.31	154	-13.31	568	1037	466
FBtr0085834	FBgn0000557	Ef1alpha100E-RC	154	-13.31	154	-13.31	569	1037	466
FBtr0085835	FBgn0000557	Ef1alpha100E-RD	154	-13.31	154	-13.31	570	1037	466
FBtr0074463	FBgn0000617	e(y)1-RA	154	-10.37	154	-10.37	637	189	153
FBtr0075086	FBgn0001078	ftz-f1-RB	154	-11.56	154	-11.56	727	997	752
FBtr0075087	FBgn0001078	ftz-f1-RA	154	-11.56	154	-11.56	728	997	752
FBtr0304627	FBgn0001078	ftz-f1-RC	154	-11.56	154	-11.56	729	2139	752
FBtr0347045	FBgn0001078	ftz-f1-RD	154	-11.56	154	-11.56	730	2139	752
FBtr0079311	FBgn0031850	Tsp-RD	154	-11.84	154	-11.84	1464	426	36
FBtr0079313	FBgn0031850	Tsp-RC	154	-11.84	154	-11.84	1466	426	36
FBtr0079314	FBgn0031850	Tsp-RE	154	-11.84	154	-11.84	1467	426	36
FBtr0343775	FBgn0031874	CG13775-RB	154	-9.75	154	-9.75	1514	228	48
FBtr0079639	FBgn0031995	CG8475-RB	154	-11.88	154	-11.88	1686	3737	1133
FBtr0079653	FBgn0032036	CG13384-RG	154	-15.49	154	-15.49	1761	669	489
FBtr0079654	FBgn0032036	CG13384-RD	154	-15.49	154	-15.49	1762	669	489
FBtr0079655	FBgn0032036	CG13384-RC	154	-15.49	154	-15.49	1763	669	489
FBtr0079656	FBgn0032036	CG13384-RE	154	-15.49	154	-15.49	1764	669	489
FBtr0079657	FBgn0032036	CG13384-RB	154	-15.49	154	-15.49	1765	669	489
FBtr0079658	FBgn0032036	CG13384-RF	154	-15.49	154	-15.49	1766	669	489
FBtr0303467	FBgn0032036	CG13384-RH	154	-15.49	154	-15.49	1767	669	489
FBtr0303468	FBgn0032036	CG13384-RI	154	-15.49	154	-15.49	1768	669	489
FBtr0303469	FBgn0032036	CG13384-RJ	154	-15.49	154	-15.49	1769	669	489
FBtr0303470	FBgn0032036	CG13384-RK	154	-15.49	154	-15.49	1770	669	489
FBtr0303471	FBgn0032036	CG13384-RL	154	-15.49	154	-15.49	1771	669	489
FBtr0335144	FBgn0032593	Trpgamma-RD	154	-14.7	154	-14.7	2408	1432	1175
FBtr0088950	FBgn0033196	CG1358-RC	154	-13.39	154	-13.39	3186	805	742
FBtr0088948	FBgn0033196	CG1358-RA	154	-13.39	154	-13.39	3187	805	742
FBtr0088949	FBgn0033196	CG1358-RB	154	-13.39	154	-13.39	3188	805	742
FBtr0303287	FBgn0033196	CG1358-RD	154	-13.39	154	-13.39	3189	1275	742
FBtr0308814	FBgn0034046	tun-RB	154	-10.08	154	-10.08	4201	2450	1396
FBtr0308815	FBgn0034046	tun-RC	154	-10.08	154	-10.08	4202	1786	1396
FBtr0304795	FBgn0034797	nahoda-RC	154	-14.79	154	-14.79	5058	1522	94
FBtr0306797	FBgn0034942	CG13566-RB	154	-14.03	154	-14.03	5197	178	98
FBtr0301654	FBgn0038165	Task6-RC	154	-13.25	154	-13.25	9123	1385	307
FBtr0334492	FBgn0038165	Task6-RD	154	-13.25	154	-13.25	9124	1545	307
FBtr0334493	FBgn0038165	Task6-RE	154	-13.25	154	-13.25	9125	1545	307
FBtr0334494	FBgn0038165	Task6-RF	154	-13.25	154	-13.25	9126	1545	307
FBtr0083288	FBgn0038425	CG14881-RB	154	-12.78	154	-12.78	9414	373	37
FBtr0075676	FBgn0003388	shd-RB	154	-9.96	154	-9.96	10859	622	50
FBtr0304700	FBgn0003388	shd-RC	154	-9.96	154	-9.96	10860	262	50
FBtr0333031	FBgn0003388	shd-RD	154	-9.96	154	-9.96	10861	622	50
FBtr0077726	FBgn0004242	Syt1-RA	154	-12.35	154	-12.35	11390	2126	1179
FBtr0077727	FBgn0004242	Syt1-RB	154	-12.35	154	-12.35	11391	2126	1179
FBtr0077728	FBgn0004242	Syt1-RC	154	-12.35	154	-12.35	11392	3600	1179
FBtr0343993	FBgn0004242	Syt1-RH	154	-12.35	154	-12.35	11393	2126	1179
FBtr0332218	FBgn0004242	Syt1-RE	154	-12.35	154	-12.35	11394	3701	1280
FBtr0332219	FBgn0004242	Syt1-RF	154	-12.35	154	-12.35	11395	3593	2646
FBtr0345331	FBgn0004242	Syt1-RI	154	-12.35	154	-12.35	11397	4011	1179
FBtr0073165	FBgn0004880	scrt-RA	154	-14.72	154	-14.72	11792	511	171
FBtr0085877	FBgn0040206	krz-RA	154	-12.59	154	-12.59	12921	3714	2619
FBtr0305491	FBgn0040510	ACXA-RD	154	-16.44	154	-16.44	13161	2182	773
FBtr0344132	FBgn0040510	ACXA-RH	154	-16.44	154	-16.44	13162	2292	870
FBtr0083556	FBgn0042693	PP2A-B'-RB	154	-14.58	154	-14.58	13706	329	152
FBtr0074284	FBgn0061200	Nup153-RA	154	-11.53	154	-11.53	16391	1361	1066
FBtr0340158	FBgn0061200	Nup153-RD	154	-11.53	154	-11.53	16392	1361	1066
FBtr0299587	FBgn0061200	Nup153-RC	154	-11.53	154	-11.53	16393	1361	1066
FBtr0299809	FBgn0085208	CG34179-RB	154	-10.67	154	-10.67	16692	1459	1127
FBtr0344625	FBgn0085208	CG34179-RC	154	-10.67	154	-10.67	16693	1088	756
FBtr0331579	FBgn0085385	CG34356-RF	154	-10.26	154	-10.26	16876	2380	2249
FBtr0309369	FBgn0085387	shakB-RG	154	-14.35	154	-14.35	16886	6990	6616
FBtr0334896	FBgn0085391	CG34362-RE	154	-11.67	154	-11.67	16898	3812	479
FBtr0332471	FBgn0086779	step-RE	154	-10.95	154	-10.95	17375	1542	1180
FBtr0081604	FBgn0250845	CG1288-RA	154	-19.39	154	-19.39	17599	1040	512
FBtr0005088	FBgn0260439	Pp2A-29B-RA	154	-11.54	154	-11.54	18302	362	214
FBtr0100533	FBgn0260439	Pp2A-29B-RB	154	-11.54	154	-11.54	18303	362	214
FBtr0100535	FBgn0260439	Pp2A-29B-RC	154	-11.54	154	-11.54	18304	362	214
FBtr0339789	FBgn0260439	Pp2A-29B-RE	154	-11.54	154	-11.54	18305	531	375
FBtr0306102	FBgn0260439	Pp2A-29B-RD	154	-11.54	154	-11.54	18306	362	214
FBtr0113427	FBgn0260943	Rbp6-RB	154	-9.95	154	-9.95	18613	1862	315
FBtr0075541	FBgn0261722	fwe-RB	154	-10.97	154	-10.97	19241	2307	456
FBtr0079570	FBgn0261822	Bsg-RE	154	-16.22	154	-16.22	19329	1574	1430
FBtr0079569	FBgn0261822	Bsg-RC	154	-16.22	154	-16.22	19331	1574	1430
FBtr0079573	FBgn0261822	Bsg-RI	154	-16.22	154	-16.22	19333	1574	1430
FBtr0079567	FBgn0261822	Bsg-RA	154	-16.22	154	-16.22	19334	1574	1430
FBtr0079572	FBgn0261822	Bsg-RH	154	-16.22	154	-16.22	19336	1574	1430
FBtr0079566	FBgn0261822	Bsg-RB	154	-16.22	154	-16.22	19337	1574	1430
FBtr0332405	FBgn0261836	Msp300-RL	154	-15.73	154	-15.73	19351	1655	1383
FBtr0303385	FBgn0261836	Msp300-RD	154	-15.73	154	-15.73	19355	1655	1383
FBtr0303387	FBgn0261836	Msp300-RG	154	-15.73	154	-15.73	19357	1655	1383
FBtr0303388	FBgn0261836	Msp300-RH	154	-15.73	154	-15.73	19358	1655	1383
FBtr0307022	FBgn0263072	CG43347-RC	154	-12.86	154	-12.86	21124	1520	1094
FBtr0345071	FBgn0263257	Cngl-RI	154	-9.86	154	-9.86	21320	3583	344
FBtr0345072	FBgn0263257	Cngl-RJ	154	-9.86	154	-9.86	21321	3583	344
FBtr0308308	FBgn0263257	Cngl-RD	154	-9.86	154	-9.86	21322	3583	344
FBtr0308309	FBgn0263257	Cngl-RE	154	-9.86	154	-9.86	21323	3583	344
FBtr0331989	FBgn0264339	CG43795-RA	154	-9.39	154	-9.39	21899	1074	224
FBtr0333254	FBgn0014396	tim-RN	154	-12.15	154	-12.15	23490	120	57
FBtr0333255	FBgn0014396	tim-RO	154	-12.15	154	-12.15	23491	120	57
FBtr0085168	FBgn0016061	side-RA	154	-13.96	154	-13.96	23957	1083	459
FBtr0309179	FBgn0016061	side-RC	154	-13.96	154	-13.96	23958	1083	459
FBtr0309180	FBgn0016061	side-RD	154	-13.96	154	-13.96	23959	1494	459
FBtr0289998	FBgn0016061	side-RB	154	-13.96	154	-13.96	23960	7185	6150
FBtr0087603	FBgn0020620	RN-tre-RC	154	-10.51	154	-10.51	24463	965	536
FBtr0330626	FBgn0020620	RN-tre-RE	154	-10.51	154	-10.51	24466	965	536
FBtr0330627	FBgn0020620	RN-tre-RF	154	-10.51	154	-10.51	24467	782	353
FBtr0333354	FBgn0023091	dimm-RB	154	-14.55	154	-14.55	24750	1808	809
FBtr0070145	FBgn0025616	CG13359-RA	154	-15.47	154	-15.47	25307	276	137
FBtr0079217	FBgn0029161	slmo-RA	154	-10.67	154	-10.67	27023	399	70
FBtr0079218	FBgn0029161	slmo-RB	154	-10.67	154	-10.67	27024	399	70
FBtr0112945	FBgn0029161	slmo-RC	154	-10.67	154	-10.67	27025	402	70
FBtr0299810	FBgn0029161	slmo-RD	154	-10.67	154	-10.67	27026	402	70
FBtr0343130	FBgn0029161	slmo-RE	154	-10.67	154	-10.67	27027	537	70
FBtr0346264	FBgn0029769	frma-RG	154	-15.76	154	-15.76	27255	1132	666
FBtr0077256	FBgn0031163	CG14579-RA	154	-12.61	154	-12.61	29037	234	105
FBtr0079028	FBgn0031678	CG31918-RA	154	-11.38	154	-11.38	29684	265	185
FBtr0305191	FBgn0000028	acj6-RI	153	-12.21	153	-12.21	38	2492	1792
FBtr0085321	FBgn0000659	fkh-RA	153	-15.7	153	-15.7	669	1188	438
FBtr0330333	FBgn0000659	fkh-RC	153	-15.7	153	-15.7	670	1914	414
FBtr0300259	FBgn0000659	fkh-RB	153	-15.7	153	-15.7	671	1938	438
FBtr0345227	FBgn0000659	fkh-RD	153	-15.7	153	-15.7	672	2045	438
FBtr0346765	FBgn0000659	fkh-RE	153	-15.7	153	-15.7	673	1914	414
FBtr0079288	FBgn0031830	COX5B-RA	153	-11.64	153	-11.64	1441	263	33
FBtr0343157	FBgn0031830	COX5B-RB	153	-11.64	153	-11.64	1442	104	33
FBtr0080200	FBgn0032348	CG4751-RA	153	-10.95	153	-10.95	2140	516	217
FBtr0310666	FBgn0033062	Ars2-RF	153	-13.75	153	-13.75	2978	2540	2118
FBtr0340269	FBgn0034258	eIF3-S8-RB	153	-10.75	153	-10.75	4446	368	294
FBtr0071682	FBgn0034647	pirk-RA	153	-11.55	153	-11.55	4895	357	326
FBtr0345682	FBgn0034647	pirk-RB	153	-11.55	153	-11.55	4896	357	326
FBtr0333219	FBgn0037153	olf413-RC	153	-15.02	153	-15.02	7938	5043	1154
FBtr0083033	FBgn0038294	Mf-RD	153	-10.76	153	-10.76	9266	730	494
FBtr0083034	FBgn0038294	Mf-RE	153	-10.76	153	-10.76	9267	730	494
FBtr0083031	FBgn0038294	Mf-RB	153	-10.76	153	-10.76	9269	898	662
FBtr0302142	FBgn0038294	Mf-RF	153	-10.76	153	-10.76	9270	898	662
FBtr0302144	FBgn0038294	Mf-RH	153	-10.76	153	-10.76	9272	898	662
FBtr0302146	FBgn0038294	Mf-RJ	153	-10.76	153	-10.76	9274	898	662
FBtr0306643	FBgn0038294	Mf-RL	153	-10.76	153	-10.76	9276	730	494
FBtr0306644	FBgn0038294	Mf-RM	153	-10.76	153	-10.76	9277	730	494
FBtr0334928	FBgn0038294	Mf-RO	153	-10.76	153	-10.76	9279	730	494
FBtr0337026	FBgn0039050	CG17110-RB	153	-12.82	153	-12.82	10111	387	227
FBtr0084683	FBgn0003429	slo-RB	153	-8.62	153	-8.62	10912	652	87
FBtr0084685	FBgn0003429	slo-RC	153	-8.62	153	-8.62	10913	652	87
FBtr0084684	FBgn0003429	slo-RA	153	-8.62	153	-8.62	10914	652	87
FBtr0100622	FBgn0003429	slo-RD	153	-8.62	153	-8.62	10915	652	87
FBtr0100623	FBgn0003429	slo-RE	153	-8.62	153	-8.62	10916	652	87
FBtr0100624	FBgn0003429	slo-RF	153	-8.62	153	-8.62	10917	652	87
FBtr0100627	FBgn0003429	slo-RH	153	-8.62	153	-8.62	10918	652	87
FBtr0100629	FBgn0003429	slo-RI	153	-8.62	153	-8.62	10919	652	87
FBtr0100631	FBgn0003429	slo-RJ	153	-8.62	153	-8.62	10920	652	87
FBtr0100632	FBgn0003429	slo-RK	153	-8.62	153	-8.62	10921	652	87
FBtr0100633	FBgn0003429	slo-RL	153	-8.62	153	-8.62	10922	652	87
FBtr0100634	FBgn0003429	slo-RM	153	-8.62	153	-8.62	10923	652	87
FBtr0100635	FBgn0003429	slo-RN	153	-8.62	153	-8.62	10924	652	87
FBtr0100636	FBgn0003429	slo-RO	153	-8.62	153	-8.62	10925	652	87
FBtr0100637	FBgn0003429	slo-RP	153	-8.62	153	-8.62	10926	652	87
FBtr0100638	FBgn0003429	slo-RQ	153	-8.62	153	-8.62	10927	652	87
FBtr0301581	FBgn0003429	slo-RR	153	-8.62	153	-8.62	10928	979	87
FBtr0330287	FBgn0003429	slo-RU	153	-8.62	153	-8.62	10931	604	39
FBtr0334294	FBgn0003429	slo-RV	153	-8.62	153	-8.62	10932	652	87
FBtr0334295	FBgn0003429	slo-RW	153	-8.62	153	-8.62	10933	652	87
FBtr0334296	FBgn0003429	slo-RX	153	-8.62	153	-8.62	10934	652	87
FBtr0303873	FBgn0041092	tai-RF	153	-10.39	153	-10.39	13411	4403	3023
FBtr0304974	FBgn0041092	tai-RG	153	-10.39	153	-10.39	13412	4403	3023
FBtr0302196	FBgn0051975	CG31975-RC	153	-11.64	153	-11.64	15086	896	674
FBtr0346127	FBgn0051976	CG31976-RC	153	-11.64	153	-11.64	15087	233	11
FBtr0302194	FBgn0051976	CG31976-RB	153	-11.64	153	-11.64	15088	233	11
FBtr0113841	FBgn0063670	CG40228-RC	153	-13.33	153	-13.33	16451	1370	1322
FBtr0071755	FBgn0067102	GlcT-1-RA	153	-12.35	153	-12.35	16506	1709	1651
FBtr0111239	FBgn0086683	Spf45-RA	153	-11.17	153	-11.17	17304	115	1
FBtr0111241	FBgn0086683	Spf45-RC	153	-11.17	153	-11.17	17305	115	1
FBtr0111240	FBgn0086683	Spf45-RB	153	-11.17	153	-11.17	17306	115	1
FBtr0299994	FBgn0259728	CG42382-RA	153	-14.44	153	-14.44	18024	297	220
FBtr0082246	FBgn0259938	cwo-RA	153	-15.08	153	-15.08	18130	1414	1334
FBtr0305151	FBgn0259938	cwo-RB	153	-15.08	153	-15.08	18131	1414	1334
FBtr0305152	FBgn0259938	cwo-RC	153	-15.08	153	-15.08	18132	1414	1334
FBtr0302722	FBgn0261617	nej-RC	153	-13.15	153	-13.15	19142	192	161
FBtr0302723	FBgn0261617	nej-RD	153	-13.15	153	-13.15	19143	4265	161
FBtr0071402	FBgn0261617	nej-RB	153	-13.15	153	-13.15	19144	192	161
FBtr0333521	FBgn0261617	nej-RE	153	-13.15	153	-13.15	19145	4034	161
FBtr0304823	FBgn0262483	Rbp-RC	153	-13.33	153	-13.33	19665	2648	2410
FBtr0304826	FBgn0262483	Rbp-RF	153	-13.33	153	-13.33	19668	2648	2410
FBtr0309860	FBgn0262527	nsl1-RL	153	-8.56	153	-8.56	19721	2678	2375
FBtr0309863	FBgn0262527	nsl1-RO	153	-8.56	153	-8.56	19724	904	601
FBtr0301730	FBgn0262527	nsl1-RH	153	-8.56	153	-8.56	19726	904	601
FBtr0301727	FBgn0262527	nsl1-RE	153	-8.56	153	-8.56	19727	904	601
FBtr0301732	FBgn0262527	nsl1-RJ	153	-8.56	153	-8.56	19728	3059	2756
FBtr0301731	FBgn0262527	nsl1-RI	153	-8.56	153	-8.56	19729	904	601
FBtr0301728	FBgn0262527	nsl1-RF	153	-8.56	153	-8.56	19730	904	601
FBtr0334592	FBgn0262527	nsl1-RP	153	-8.56	153	-8.56	19731	1081	601
FBtr0083595	FBgn0010877	l(3)05822-RA	153	-13.38	153	-13.38	20529	713	156
FBtr0083596	FBgn0010877	l(3)05822-RB	153	-13.38	153	-13.38	20530	713	156
FBtr0334313	FBgn0010877	l(3)05822-RC	153	-13.38	153	-13.38	20531	713	156
FBtr0334314	FBgn0010877	l(3)05822-RD	153	-13.38	153	-13.38	20532	713	156
FBtr0330269	FBgn0263995	cpo-RN	153	-11.93	153	-11.93	21673	3232	2725
FBtr0330271	FBgn0263995	cpo-RP	153	-11.93	153	-11.93	21675	2313	1806
FBtr0330273	FBgn0263995	cpo-RR	153	-11.93	153	-11.93	21677	3264	2757
FBtr0330279	FBgn0263995	cpo-RX	153	-11.93	153	-11.93	21683	3673	3166
FBtr0330280	FBgn0263995	cpo-RY	153	-11.93	153	-11.93	21684	3688	3181
FBtr0299637	FBgn0267337	rn-RC	153	-13.36	153	-13.36	23083	1425	632
FBtr0299639	FBgn0267337	rn-RF	153	-13.36	153	-13.36	23084	1425	632
FBtr0300518	FBgn0267337	rn-RE	153	-13.36	153	-13.36	23085	1425	632
FBtr0330140	FBgn0267337	rn-RG	153	-13.36	153	-13.36	23086	1407	614
FBtr0080115	FBgn0015320	Ubc2-RA	153	-9.29	153	-9.29	23644	555	124
FBtr0080116	FBgn0015320	Ubc2-RB	153	-9.29	153	-9.29	23645	555	124
FBtr0333492	FBgn0015320	Ubc2-RC	153	-9.29	153	-9.29	23646	1108	124
FBtr0345437	FBgn0015320	Ubc2-RD	153	-9.29	153	-9.29	23647	555	124
FBtr0329901	FBgn0015558	tty-RD	153	-13.87	153	-13.87	23730	3292	1871
FBtr0329903	FBgn0015558	tty-RF	153	-13.87	153	-13.87	23732	3347	1871
FBtr0077114	FBgn0015806	S6k-RA	153	-10.11	153	-10.11	23877	1482	1427
FBtr0333264	FBgn0015806	S6k-RB	153	-10.11	153	-10.11	23878	2881	1427
FBtr0085681	FBgn0027654	jdp-RA	153	-13.32	153	-13.32	26298	1272	935
FBtr0085682	FBgn0027654	jdp-RB	153	-13.32	153	-13.32	26299	1272	935
FBtr0331834	FBgn0028582	lqf-RH	153	-15.03	153	-15.03	26662	2977	1294
FBtr0309030	FBgn0029939	CG9650-RI	153	-10.73	153	-10.73	27471	2030	1079
FBtr0301240	FBgn0029939	CG9650-RG	153	-10.73	153	-10.73	27472	2030	1079
FBtr0301241	FBgn0029939	CG9650-RH	153	-10.73	153	-10.73	27473	1636	1079
FBtr0339815	FBgn0029939	CG9650-RJ	153	-10.73	153	-10.73	27474	1636	1079
FBtr0339447	FBgn0030581	CG14408-RG	153	-10.17	153	-10.17	28229	853	297
FBtr0074759	FBgn0031051	Ranbp21-RA	153	-7.06	153	-7.06	28884	986	313
FBtr0340614	FBgn0031051	Ranbp21-RB	153	-7.06	153	-7.06	28885	1269	313
FBtr0077953	FBgn0031298	Atg4a-RA	153	-11.69	153	-11.69	29220	507	462
FBtr0072367	FBgn0000037	mAChR-A-RA	152	-11.82	152	-11.82	49	2137	1003
FBtr0072368	FBgn0000037	mAChR-A-RB	152	-11.82	152	-11.82	50	2137	1003
FBtr0335285	FBgn0033050	Pngl-RC	152	-11.06	152	-11.06	2957	680	465
FBtr0347012	FBgn0033659	Damm-RB	152	-16.99	152	-16.99	3738	1231	1203
FBtr0087449	FBgn0033973	HPS1-RA	152	-12.64	152	-12.64	4113	200	88
FBtr0087019	FBgn0034180	Ehbp1-RB	152	-10.96	152	-10.96	4363	549	62
FBtr0340073	FBgn0034180	Ehbp1-RI	152	-10.96	152	-10.96	4364	781	62
FBtr0114627	FBgn0034180	Ehbp1-RF	152	-10.96	152	-10.96	4365	549	62
FBtr0114628	FBgn0034180	Ehbp1-RG	152	-10.96	152	-10.96	4366	549	62
FBtr0071629	FBgn0034598	CG4266-RA	152	-11.34	152	-11.34	4839	543	228
FBtr0113100	FBgn0034598	CG4266-RB	152	-11.34	152	-11.34	4840	543	228
FBtr0342871	FBgn0034598	CG4266-RD	152	-11.34	152	-11.34	4841	543	228
FBtr0310422	FBgn0034598	CG4266-RC	152	-11.34	152	-11.34	4842	2909	2594
FBtr0071699	FBgn0034634	CG10494-RB	152	-11.09	152	-11.09	4873	483	430
FBtr0071757	FBgn0034691	Synj-RA	152	-12.87	152	-12.87	4931	797	497
FBtr0308239	FBgn0034691	Synj-RC	152	-12.87	152	-12.87	4932	797	497
FBtr0072551	FBgn0035142	hipk-RB	152	-10.53	152	-10.53	5453	1749	1264
FBtr0072552	FBgn0035142	hipk-RA	152	-10.53	152	-10.53	5454	6801	1264
FBtr0331786	FBgn0035142	hipk-RC	152	-10.53	152	-10.53	5455	1749	1264
FBtr0301645	FBgn0035504	Teh4-RB	152	-10.16	152	-10.16	5929	530	102
FBtr0300097	FBgn0036192	Pallidin-RB	152	-13.31	152	-13.31	6717	382	84
FBtr0075892	FBgn0036345	CG17300-RA	152	-11.9	152	-11.9	6912	117	83
FBtr0075297	FBgn0036684	CG3764-RA	152	-15	152	-15	7295	692	597
FBtr0321285	FBgn0036684	CG3764-RB	152	-15	152	-15	7296	692	597
FBtr0332122	FBgn0036684	CG3764-RC	152	-15	152	-15	7297	692	597
FBtr0331842	FBgn0036734	CG7564-RB	152	-12.83	152	-12.83	7359	1206	141
FBtr0078539	FBgn0037182	ArfGAP3-RA	152	-10	152	-10	7966	631	601
FBtr0344116	FBgn0037384	dgrn-RD	152	-11.12	152	-11.12	8200	338	158
FBtr0078638	FBgn0037384	dgrn-RA	152	-11.12	152	-11.12	8201	338	158
FBtr0078639	FBgn0037384	dgrn-RB	152	-11.12	152	-11.12	8202	338	158
FBtr0300330	FBgn0038237	Pde6-RB	152	-11.89	152	-11.89	9207	1730	1561
FBtr0330048	FBgn0038237	Pde6-RC	152	-11.89	152	-11.89	9208	1712	1543
FBtr0345168	FBgn0038237	Pde6-RD	152	-11.89	152	-11.89	9209	1730	1561
FBtr0084501	FBgn0039136	CG5902-RB	152	-6.9	152	-6.9	10217	579	482
FBtr0084502	FBgn0039136	CG5902-RA	152	-6.9	152	-6.9	10218	579	482
FBtr0301165	FBgn0039136	CG5902-RC	152	-6.9	152	-6.9	10219	579	482
FBtr0305044	FBgn0039172	Spase22-23-RB	152	-8.93	152	-8.93	10273	1076	654
FBtr0273235	FBgn0004370	Ptp10D-RE	152	-11.78	152	-11.78	11432	1976	1481
FBtr0330393	FBgn0004370	Ptp10D-RG	152	-11.78	152	-11.78	11434	1976	1481
FBtr0330394	FBgn0004370	Ptp10D-RH	152	-11.78	152	-11.78	11435	2929	2434
FBtr0331406	FBgn0004370	Ptp10D-RI	152	-11.78	152	-11.78	11436	1976	1481
FBtr0085507	FBgn0004622	TkR99D-RA	152	-12.26	152	-12.26	11619	707	54
FBtr0301656	FBgn0004622	TkR99D-RB	152	-12.26	152	-12.26	11620	707	54
FBtr0085069	FBgn0039466	CG5521-RA	152	-10.79	152	-10.79	12157	1333	1275
FBtr0301134	FBgn0039466	CG5521-RB	152	-10.79	152	-10.79	12158	1333	1275
FBtr0300326	FBgn0040370	CG13375-RB	152	-11.73	152	-11.73	13086	3397	2492
FBtr0072040	FBgn0050413	CG30413-RA	152	-13.35	152	-13.35	14270	114	38
FBtr0307190	FBgn0051268	CG31268-RB	152	-10.44	152	-10.44	14586	1074	229
FBtr0306853	FBgn0052150	CG32150-RD	152	-16.03	152	-16.03	15207	954	373
FBtr0346507	FBgn0052152	CG32152-RB	152	-9.89	152	-9.89	15208	2442	1313
FBtr0346508	FBgn0052152	CG32152-RC	152	-9.89	152	-9.89	15209	2442	1313
FBtr0078100	FBgn0067779	dbr-RB	152	-13.03	152	-13.03	16515	495	179
FBtr0306537	FBgn0067779	dbr-RD	152	-13.03	152	-13.03	16517	495	179
FBtr0306539	FBgn0067779	dbr-RF	152	-13.03	152	-13.03	16519	495	179
FBtr0110806	FBgn0083949	CG34113-RO	152	-13.99	152	-13.99	16595	2284	71
FBtr0110807	FBgn0083949	CG34113-RP	152	-13.99	152	-13.99	16596	2284	71
FBtr0112629	FBgn0085417	natalisin-RC	152	-12.46	152	-12.46	16956	138	76
FBtr0301081	FBgn0085417	natalisin-RD	152	-12.46	152	-12.46	16957	128	76
FBtr0112636	FBgn0085421	Epac-RD	152	-10.65	152	-10.65	16963	734	414
FBtr0329849	FBgn0085421	Epac-RE	152	-10.65	152	-10.65	16964	2932	414
FBtr0329850	FBgn0085421	Epac-RF	152	-10.65	152	-10.65	16965	734	414
FBtr0329851	FBgn0085421	Epac-RG	152	-10.65	152	-10.65	16966	734	414
FBtr0345992	FBgn0086384	Mer-RB	152	-12.72	152	-12.72	17227	1135	1104
FBtr0299606	FBgn0259163	CG42268-RD	152	-14.55	152	-14.55	17701	734	24
FBtr0299607	FBgn0259163	CG42268-RF	152	-14.55	152	-14.55	17702	734	24
FBtr0301858	FBgn0259163	CG42268-RH	152	-14.55	152	-14.55	17703	1272	562
FBtr0331537	FBgn0259163	CG42268-RI	152	-14.55	152	-14.55	17704	734	24
FBtr0331538	FBgn0259163	CG42268-RJ	152	-14.55	152	-14.55	17705	734	24
FBtr0331539	FBgn0259163	CG42268-RK	152	-14.55	152	-14.55	17706	734	24
FBtr0331540	FBgn0259163	CG42268-RL	152	-14.55	152	-14.55	17707	734	24
FBtr0331541	FBgn0259163	CG42268-RM	152	-14.55	152	-14.55	17708	1272	562
FBtr0078419	FBgn0261953	TfAP-2-RA	152	-12.57	152	-12.57	19458	395	239
FBtr0078418	FBgn0261953	TfAP-2-RB	152	-12.57	152	-12.57	19459	395	239
FBtr0333465	FBgn0261953	TfAP-2-RC	152	-12.57	152	-12.57	19460	395	239
FBtr0333466	FBgn0261953	TfAP-2-RD	152	-12.57	152	-12.57	19461	395	239
FBtr0333467	FBgn0261953	TfAP-2-RE	152	-12.57	152	-12.57	19462	395	239
FBtr0333468	FBgn0261953	TfAP-2-RF	152	-12.57	152	-12.57	19463	395	239
FBtr0075890	FBgn0010452	trn-RA	152	-13.44	152	-13.44	20395	566	439
FBtr0330075	FBgn0010452	trn-RB	152	-13.44	152	-13.44	20396	524	397
FBtr0081888	FBgn0263231	bel-RA	152	-13.95	152	-13.95	21284	198	96
FBtr0334319	FBgn0263231	bel-RB	152	-13.95	152	-13.95	21285	810	96
FBtr0333293	FBgn0263603	Zn72D-RE	152	-11.16	152	-11.16	21499	2954	425
FBtr0330343	FBgn0264001	bru-3-RA	152	-14.06	152	-14.06	21699	558	61
FBtr0330344	FBgn0264001	bru-3-RD	152	-14.06	152	-14.06	21700	558	61
FBtr0330346	FBgn0264001	bru-3-RF	152	-14.06	152	-14.06	21702	558	61
FBtr0330347	FBgn0264001	bru-3-RB	152	-14.06	152	-14.06	21703	558	61
FBtr0330348	FBgn0264001	bru-3-RK	152	-14.06	152	-14.06	21704	558	61
FBtr0330349	FBgn0264001	bru-3-RC	152	-14.06	152	-14.06	21705	558	61
FBtr0330350	FBgn0264001	bru-3-RL	152	-14.06	152	-14.06	21706	558	61
FBtr0330354	FBgn0264001	bru-3-RJ	152	-14.06	152	-14.06	21710	1876	1379
FBtr0330356	FBgn0264001	bru-3-RN	152	-14.06	152	-14.06	21711	558	61
FBtr0330357	FBgn0264001	bru-3-RO	152	-14.06	152	-14.06	21712	558	61
FBtr0336853	FBgn0265084	CG44195-RA	152	-11.17	152	-11.17	22330	3711	2263
FBtr0344176	FBgn0266377	Pde8-RC	152	-13.98	152	-13.98	22752	1328	976
FBtr0344177	FBgn0266377	Pde8-RD	152	-13.98	152	-13.98	22753	1328	976
FBtr0344179	FBgn0266377	Pde8-RB	152	-13.98	152	-13.98	22755	1328	976
FBtr0344184	FBgn0266377	Pde8-RO	152	-13.98	152	-13.98	22760	1328	976
FBtr0345576	FBgn0266845	CG45307-RA	152	-8.09	152	-8.09	23004	172	130
FBtr0079781	FBgn0013746	alien-RB	152	-11.42	152	-11.42	23276	870	649
FBtr0339550	FBgn0013746	alien-RD	152	-11.42	152	-11.42	23278	1721	649
FBtr0334464	FBgn0014133	bif-RE	152	-11.18	152	-11.18	23439	5189	1985
FBtr0334465	FBgn0014133	bif-RF	152	-11.18	152	-11.18	23440	3327	123
FBtr0332210	FBgn0015399	kek1-RB	152	-7.77	152	-7.77	23682	2018	50
FBtr0346702	FBgn0015399	kek1-RC	152	-7.77	152	-7.77	23683	82	50
FBtr0329956	FBgn0019968	Khc-73-RD	152	-16.1	152	-16.1	24230	2974	1717
FBtr0070316	FBgn0023510	Rbcn-3B-RA	152	-10.99	152	-10.99	24850	840	625
FBtr0335417	FBgn0024963	GluClalpha-RI	152	-12.82	152	-12.82	25164	3633	2533
FBtr0335418	FBgn0024963	GluClalpha-RJ	152	-12.82	152	-12.82	25165	3633	2533
FBtr0335421	FBgn0024963	GluClalpha-RM	152	-12.82	152	-12.82	25168	3633	2533
FBtr0343789	FBgn0024963	GluClalpha-RO	152	-12.82	152	-12.82	25170	3633	2533
FBtr0074276	FBgn0026575	hang-RA	152	-13.54	152	-13.54	25814	1721	113
FBtr0290069	FBgn0026575	hang-RC	152	-13.54	152	-13.54	25815	1642	34
FBtr0343571	FBgn0026575	hang-RD	152	-13.54	152	-13.54	25816	1642	34
FBtr0079722	FBgn0027094	Aats-ala-RB	152	-15.15	152	-15.15	25958	157	43
FBtr0079721	FBgn0027094	Aats-ala-RA	152	-15.15	152	-15.15	25959	157	43
FBtr0071063	FBgn0029949	CG15035-RA	152	-16.22	152	-16.22	27489	277	203
FBtr0073943	FBgn0030574	CG9413-RA	152	-10.49	152	-10.49	28216	1633	430
FBtr0073944	FBgn0030574	CG9413-RB	152	-10.49	152	-10.49	28217	1633	430
FBtr0343365	FBgn0030574	CG9413-RC	152	-10.49	152	-10.49	28218	1633	430
FBtr0343366	FBgn0030574	CG9413-RD	152	-10.49	152	-10.49	28219	1790	587
FBtr0335041	FBgn0031100	CG1504-RD	152	-11.37	152	-11.37	28958	2205	1827
FBtr0335042	FBgn0031100	CG1504-RE	152	-11.37	152	-11.37	28959	2205	1827
FBtr0083388	FBgn0000014	abd-A-RB	151	-11.52	151	-11.52	5	2060	1544
FBtr0083387	FBgn0000014	abd-A-RA	151	-11.52	151	-11.52	6	2060	1544
FBtr0300485	FBgn0000014	abd-A-RC	151	-11.52	151	-11.52	7	2060	1544
FBtr0306337	FBgn0000014	abd-A-RD	151	-11.52	151	-11.52	8	2473	1544
FBtr0073516	FBgn0002948	nod-RA	151	-12.32	151	-12.32	1350	296	65
FBtr0340297	FBgn0002948	nod-RB	151	-12.32	151	-12.32	1351	126	65
FBtr0088091	FBgn0033636	tou-RA	151	-10.52	151	-10.52	3711	947	713
FBtr0113066	FBgn0033636	tou-RE	151	-10.52	151	-10.52	3713	947	713
FBtr0333070	FBgn0033636	tou-RF	151	-10.52	151	-10.52	3714	2342	713
FBtr0333071	FBgn0033636	tou-RG	151	-10.52	151	-10.52	3715	947	713
FBtr0087298	FBgn0034049	bdg-RA	151	-11.83	151	-11.83	4203	143	116
FBtr0087299	FBgn0034049	bdg-RB	151	-11.83	151	-11.83	4204	143	116
FBtr0087300	FBgn0034049	bdg-RC	151	-11.83	151	-11.83	4205	143	116
FBtr0340017	FBgn0034049	bdg-RD	151	-11.83	151	-11.83	4206	143	116
FBtr0331790	FBgn0035688	CG10289-RC	151	-11.31	151	-11.31	6127	4885	3467
FBtr0083323	FBgn0038421	CG17931-RA	151	-13.28	151	-13.28	9405	402	151
FBtr0332177	FBgn0038421	CG17931-RC	151	-13.28	151	-13.28	9406	721	151
FBtr0345208	FBgn0038421	CG17931-RD	151	-13.28	151	-13.28	9407	1007	151
FBtr0083846	FBgn0038755	Hs6st-RA	151	-8	151	-8	9787	677	215
FBtr0335240	FBgn0038755	Hs6st-RB	151	-8	151	-8	9788	1120	215
FBtr0084553	FBgn0039161	CG13606-RA	151	-15.95	151	-15.95	10259	703	236
FBtr0335412	FBgn0039161	CG13606-RC	151	-15.95	151	-15.95	10261	497	30
FBtr0073212	FBgn0003206	Ras64B-RA	151	-9.74	151	-9.74	10678	938	266
FBtr0111036	FBgn0003392	shi-RH	151	-10.57	151	-10.57	10867	1269	783
FBtr0111037	FBgn0003392	shi-RI	151	-10.57	151	-10.57	10868	1269	783
FBtr0074118	FBgn0003392	shi-RB	151	-10.57	151	-10.57	10869	1269	783
FBtr0074119	FBgn0003392	shi-RC	151	-10.57	151	-10.57	10870	1269	783
FBtr0074121	FBgn0003392	shi-RA	151	-10.57	151	-10.57	10871	1269	783
FBtr0074122	FBgn0003392	shi-RE	151	-10.57	151	-10.57	10872	1269	783
FBtr0301597	FBgn0003392	shi-RM	151	-10.57	151	-10.57	10879	1269	783
FBtr0333718	FBgn0003392	shi-RO	151	-10.57	151	-10.57	10881	1868	783
FBtr0089618	FBgn0003742	tra2-RB	151	-13.32	151	-13.32	11162	829	254
FBtr0070435	FBgn0004050	z-RA	151	-11.8	151	-11.8	11284	343	92
FBtr0100380	FBgn0004050	z-RB	151	-11.8	151	-11.8	11285	343	92
FBtr0331161	FBgn0004050	z-RC	151	-11.8	151	-11.8	11286	253	2
FBtr0304605	FBgn0004595	pros-RJ	151	-12.52	151	-12.52	11588	1099	352
FBtr0304606	FBgn0004595	pros-RK	151	-12.52	151	-12.52	11589	2980	352
FBtr0304607	FBgn0004595	pros-RL	151	-12.52	151	-12.52	11590	1099	352
FBtr0333328	FBgn0039858	CycG-RF	151	-8.06	151	-8.06	12643	2631	2174
FBtr0346146	FBgn0040682	CG14664-RC	151	-11.26	151	-11.26	13246	1133	663
FBtr0086499	FBgn0040732	CG16926-RA	151	-12.92	151	-12.92	13271	229	90
FBtr0345818	FBgn0040732	CG16926-RB	151	-12.92	151	-12.92	13272	229	90
FBtr0344949	FBgn0040823	dpr6-RF	151	-14.05	151	-14.05	13331	2394	2161
FBtr0100499	FBgn0041605	cpx-RJ	151	-9.39	151	-9.39	13536	2776	1090
FBtr0100500	FBgn0041605	cpx-RK	151	-9.39	151	-9.39	13537	2776	1090
FBtr0078898	FBgn0041605	cpx-RI	151	-9.39	151	-9.39	13538	2776	1090
FBtr0078900	FBgn0041605	cpx-RC	151	-9.39	151	-9.39	13539	2776	1090
FBtr0078901	FBgn0041605	cpx-RA	151	-9.39	151	-9.39	13540	2776	1090
FBtr0078897	FBgn0041605	cpx-RG	151	-9.39	151	-9.39	13542	2776	1090
FBtr0078899	FBgn0041605	cpx-RH	151	-9.39	151	-9.39	13543	2776	1090
FBtr0113337	FBgn0041605	cpx-RL	151	-9.39	151	-9.39	13544	2776	1090
FBtr0113338	FBgn0041605	cpx-RM	151	-9.39	151	-9.39	13545	2776	1090
FBtr0113340	FBgn0041605	cpx-RO	151	-9.39	151	-9.39	13546	2776	1090
FBtr0113341	FBgn0041605	cpx-RP	151	-9.39	151	-9.39	13547	2776	1090
FBtr0300789	FBgn0041605	cpx-RS	151	-9.39	151	-9.39	13548	2776	1090
FBtr0301768	FBgn0041605	cpx-RU	151	-9.39	151	-9.39	13549	3980	2294
FBtr0301769	FBgn0041605	cpx-RV	151	-9.39	151	-9.39	13550	2776	1090
FBtr0301770	FBgn0041605	cpx-RW	151	-9.39	151	-9.39	13551	2776	1090
FBtr0301771	FBgn0041605	cpx-RX	151	-9.39	151	-9.39	13552	7043	2294
FBtr0301772	FBgn0041605	cpx-RY	151	-9.39	151	-9.39	13553	2776	1090
FBtr0336482	FBgn0041605	cpx-RAB	151	-9.39	151	-9.39	13556	8785	4036
FBtr0075098	FBgn0042134	Capr-RA	151	-11.15	151	-11.15	13640	881	329
FBtr0345806	FBgn0042134	Capr-RB	151	-11.15	151	-11.15	13641	881	329
FBtr0113418	FBgn0052062	A2bp1-RE	151	-14.29	151	-14.29	15144	402	119
FBtr0113419	FBgn0052062	A2bp1-RF	151	-14.29	151	-14.29	15145	628	345
FBtr0305093	FBgn0052062	A2bp1-RH	151	-14.29	151	-14.29	15146	2838	119
FBtr0305094	FBgn0052062	A2bp1-RI	151	-14.29	151	-14.29	15147	360	119
FBtr0305095	FBgn0052062	A2bp1-RJ	151	-14.29	151	-14.29	15148	3447	119
FBtr0305096	FBgn0052062	A2bp1-RK	151	-14.29	151	-14.29	15149	2838	119
FBtr0305097	FBgn0052062	A2bp1-RL	151	-14.29	151	-14.29	15150	402	119
FBtr0332985	FBgn0052062	A2bp1-RM	151	-14.29	151	-14.29	15151	3447	119
FBtr0340295	FBgn0052666	Drak-RE	151	-8.17	151	-8.17	15571	2091	992
FBtr0301020	FBgn0052666	Drak-RC	151	-8.17	151	-8.17	15572	2091	992
FBtr0301021	FBgn0052666	Drak-RD	151	-8.17	151	-8.17	15573	2091	992
FBtr0079266	FBgn0086357	Sec61alpha-RA	151	-9.02	151	-9.02	17192	452	22
FBtr0345753	FBgn0086357	Sec61alpha-RB	151	-9.02	151	-9.02	17193	452	22
FBtr0081572	FBgn0086372	lap-RA	151	-15.45	151	-15.45	17216	2516	2170
FBtr0302183	FBgn0086372	lap-RC	151	-15.45	151	-15.45	17217	2431	2085
FBtr0302184	FBgn0086372	lap-RD	151	-15.45	151	-15.45	17218	2431	2085
FBtr0305155	FBgn0086372	lap-RG	151	-15.45	151	-15.45	17221	2431	2085
FBtr0334886	FBgn0086372	lap-RH	151	-15.45	151	-15.45	17222	2431	2085
FBtr0334887	FBgn0086372	lap-RI	151	-15.45	151	-15.45	17223	2431	2085
FBtr0334888	FBgn0086372	lap-RJ	151	-15.45	151	-15.45	17224	2431	2085
FBtr0344158	FBgn0086686	l(3)L1231-RD	151	-10.45	151	-10.45	17308	2263	865
FBtr0300198	FBgn0259917	CG42446-RA	151	-13.28	151	-13.28	18106	704	457
FBtr0082070	FBgn0261049	Vps45-RA	151	-14.39	151	-14.39	18680	228	190
FBtr0345067	FBgn0261872	scaf6-RE	151	-11.76	151	-11.76	19405	2127	1163
FBtr0305302	FBgn0262614	pyd-RK	151	-8.33	151	-8.33	19823	992	286
FBtr0305303	FBgn0262614	pyd-RL	151	-8.33	151	-8.33	19824	992	286
FBtr0332391	FBgn0263111	cac-RP	151	-14.36	151	-14.36	21200	2271	454
FBtr0307879	FBgn0263220	Hk-RG	151	-8.59	151	-8.59	21278	4686	4097
FBtr0331336	FBgn0263220	Hk-RK	151	-8.59	151	-8.59	21281	6097	4097
FBtr0330266	FBgn0263993	CG43736-RF	151	-12.18	151	-12.18	21665	1726	837
FBtr0330267	FBgn0263993	CG43736-RG	151	-12.18	151	-12.18	21666	1726	837
FBtr0330268	FBgn0263993	CG43736-RI	151	-12.18	151	-12.18	21667	2881	1992
FBtr0345898	FBgn0263993	CG43736-RL	151	-12.18	151	-12.18	21670	2881	1992
FBtr0334135	FBgn0264815	Pde1c-RH	151	-11.27	151	-11.27	22184	1628	727
FBtr0334137	FBgn0264815	Pde1c-RC	151	-11.27	151	-11.27	22186	2402	727
FBtr0334138	FBgn0264815	Pde1c-RE	151	-11.27	151	-11.27	22187	1628	727
FBtr0334140	FBgn0264815	Pde1c-RG	151	-11.27	151	-11.27	22189	2402	727
FBtr0334141	FBgn0264815	Pde1c-RJ	151	-11.27	151	-11.27	22190	1628	727
FBtr0334142	FBgn0264815	Pde1c-RK	151	-11.27	151	-11.27	22191	1628	727
FBtr0344148	FBgn0264815	Pde1c-RL	151	-11.27	151	-11.27	22192	1628	727
FBtr0078395	FBgn0014143	croc-RA	151	-8.2	151	-8.2	23454	535	430
FBtr0076775	FBgn0016694	Pdp1-RF	151	-14.72	151	-14.72	24024	1989	1298
FBtr0076776	FBgn0016694	Pdp1-RB	151	-14.72	151	-14.72	24025	1989	1298
FBtr0076777	FBgn0016694	Pdp1-RG	151	-14.72	151	-14.72	24026	1989	1298
FBtr0076780	FBgn0016694	Pdp1-RD	151	-14.72	151	-14.72	24027	1989	1298
FBtr0076782	FBgn0016694	Pdp1-RC	151	-14.72	151	-14.72	24028	1989	1298
FBtr0300499	FBgn0016694	Pdp1-RI	151	-14.72	151	-14.72	24029	1989	1298
FBtr0300500	FBgn0016694	Pdp1-RJ	151	-14.72	151	-14.72	24030	1989	1298
FBtr0332080	FBgn0016694	Pdp1-RL	151	-14.72	151	-14.72	24033	1989	1298
FBtr0332081	FBgn0016694	Pdp1-RM	151	-14.72	151	-14.72	24034	1989	1298
FBtr0332082	FBgn0016694	Pdp1-RN	151	-14.72	151	-14.72	24035	1989	1298
FBtr0332083	FBgn0016694	Pdp1-RO	151	-14.72	151	-14.72	24036	1989	1298
FBtr0075028	FBgn0016797	fz2-RB	151	-11.7	151	-11.7	24066	1304	1204
FBtr0075029	FBgn0016797	fz2-RA	151	-11.7	151	-11.7	24067	1304	1204
FBtr0112890	FBgn0016797	fz2-RC	151	-11.7	151	-11.7	24068	1969	1204
FBtr0299586	FBgn0016797	fz2-RD	151	-11.7	151	-11.7	24069	1304	1204
FBtr0330194	FBgn0016797	fz2-RE	151	-11.7	151	-11.7	24070	1304	1204
FBtr0330195	FBgn0016797	fz2-RF	151	-11.7	151	-11.7	24071	968	868
FBtr0332735	FBgn0016797	fz2-RG	151	-11.7	151	-11.7	24072	3227	1204
FBtr0307538	FBgn0024941	RSG7-RB	151	-11.9	151	-11.9	25144	2926	1536
FBtr0070501	FBgn0024994	Csat-RA	151	-12.32	151	-12.32	25204	714	466
FBtr0273276	FBgn0024994	Csat-RB	151	-12.32	151	-12.32	25205	714	466
FBtr0345710	FBgn0024994	Csat-RC	151	-12.32	151	-12.32	25206	714	466
FBtr0300594	FBgn0028875	nAChRalpha5-RD	151	-12.39	151	-12.39	26828	5083	3540
FBtr0080540	FBgn0028919	CG16865-RA	151	-10.36	151	-10.36	26870	48	13
FBtr0331626	FBgn0028919	CG16865-RB	151	-10.36	151	-10.36	26871	682	13
FBtr0070980	FBgn0029897	RpL17-RB	151	-14.63	151	-14.63	27423	240	18
FBtr0070981	FBgn0029897	RpL17-RC	151	-14.63	151	-14.63	27424	240	18
FBtr0070982	FBgn0029897	RpL17-RD	151	-14.63	151	-14.63	27425	240	18
FBtr0070983	FBgn0029897	RpL17-RA	151	-14.63	151	-14.63	27426	240	18
FBtr0345292	FBgn0029897	RpL17-RE	151	-14.63	151	-14.63	27427	240	18
FBtr0074771	FBgn0031030	Tao-RE	151	-14.46	151	-14.46	28833	412	80
FBtr0074772	FBgn0031030	Tao-RD	151	-14.46	151	-14.46	28834	412	80
FBtr0074773	FBgn0031030	Tao-RB	151	-14.46	151	-14.46	28835	412	80
FBtr0074774	FBgn0031030	Tao-RA	151	-14.46	151	-14.46	28836	412	80
FBtr0303999	FBgn0031030	Tao-RF	151	-14.46	151	-14.46	28838	1860	80
FBtr0304000	FBgn0031030	Tao-RG	151	-14.46	151	-14.46	28839	934	80
FBtr0336691	FBgn0031030	Tao-RI	151	-14.46	151	-14.46	28840	412	80
FBtr0077811	FBgn0031374	CG7337-RA	151	-11.3	151	-11.3	29295	853	822
FBtr0309828	FBgn0031374	CG7337-RF	151	-11.3	151	-11.3	29300	853	822
FBtr0333006	FBgn0031374	CG7337-RG	151	-11.3	151	-11.3	29301	853	822
FBtr0333569	FBgn0001257	ImpL2-RD	150	-12.37	150	-12.37	924	831	562
FBtr0079499	FBgn0031940	CG7214-RA	150	-10.66	150	-10.66	1612	526	257
FBtr0080037	FBgn0032260	CG13144-RA	150	-14.82	150	-14.82	2052	589	407
FBtr0290112	FBgn0033313	Cirl-RB	150	-13.68	150	-13.68	3319	1696	664
FBtr0310448	FBgn0033313	Cirl-RI	150	-13.68	150	-13.68	3321	1696	664
FBtr0310449	FBgn0033313	Cirl-RJ	150	-10.55	150	-10.55	3322	499	403
FBtr0310450	FBgn0033313	Cirl-RK	150	-10.55	150	-10.55	3323	499	403
FBtr0305080	FBgn0033313	Cirl-RF	150	-10.55	150	-10.55	3324	499	403
FBtr0305081	FBgn0033313	Cirl-RG	150	-13.68	150	-13.68	3325	1696	664
FBtr0305082	FBgn0033313	Cirl-RH	150	-13.68	150	-13.68	3326	1696	664
FBtr0072315	FBgn0035033	CG3548-RA	150	-11.73	150	-11.73	5314	755	494
FBtr0075515	FBgn0036552	CG17028-RA	150	-11.95	150	-11.95	7150	266	21
FBtr0083539	FBgn0038564	CG7785-RA	150	-13.47	150	-13.47	9562	862	130
FBtr0334611	FBgn0038975	Nrx-1-RG	150	-12.18	150	-12.18	10035	569	152
FBtr0078509	FBgn0004449	Ten-m-RB	150	-11.56	150	-11.56	11506	2544	1591
FBtr0079346	FBgn0004838	Hrb27C-RA	150	-10.79	150	-10.79	11727	1351	169
FBtr0079347	FBgn0004838	Hrb27C-RC	150	-10.79	150	-10.79	11728	591	169
FBtr0307031	FBgn0004838	Hrb27C-RG	150	-10.79	150	-10.79	11731	1351	169
FBtr0301403	FBgn0004838	Hrb27C-RD	150	-10.79	150	-10.79	11733	591	169
FBtr0301404	FBgn0004838	Hrb27C-RE	150	-10.79	150	-10.79	11734	591	169
FBtr0085772	FBgn0039830	ATPsynC-RA	150	-13.2	150	-13.2	12600	869	195
FBtr0085773	FBgn0039830	ATPsynC-RC	150	-13.2	150	-13.2	12601	869	195
FBtr0085774	FBgn0039830	ATPsynC-RB	150	-13.2	150	-13.2	12602	869	195
FBtr0305121	FBgn0039830	ATPsynC-RE	150	-13.2	150	-13.2	12603	869	195
FBtr0305122	FBgn0039830	ATPsynC-RF	150	-13.2	150	-13.2	12604	869	195
FBtr0306237	FBgn0039830	ATPsynC-RG	150	-13.2	150	-13.2	12605	244	195
FBtr0089196	FBgn0039925	Kif3C-RA	150	-13.19	150	-13.19	12751	2345	1034
FBtr0301706	FBgn0040092	lectin-46Cb-RB	150	-16.7	150	-16.7	12907	65	16
FBtr0077633	FBgn0041111	lilli-RB	150	-11.31	150	-11.31	13435	2181	956
FBtr0088935	FBgn0042135	CG18812-RC	150	-9.46	150	-9.46	13642	816	775
FBtr0088936	FBgn0042135	CG18812-RB	150	-9.46	150	-9.46	13643	2455	775
FBtr0088937	FBgn0042135	CG18812-RA	150	-9.46	150	-9.46	13644	983	775
FBtr0330327	FBgn0042135	CG18812-RE	150	-9.46	150	-9.46	13645	959	751
FBtr0330328	FBgn0042135	CG18812-RF	150	-9.46	150	-9.46	13646	816	775
FBtr0306239	FBgn0042135	CG18812-RD	150	-9.46	150	-9.46	13647	816	775
FBtr0075757	FBgn0052137	CG32137-RA	150	-11.53	150	-11.53	15202	795	365
FBtr0075758	FBgn0052137	CG32137-RB	150	-11.53	150	-11.53	15203	795	365
FBtr0077172	FBgn0052423	shep-RA	150	-11.16	150	-11.16	15369	927	155
FBtr0077173	FBgn0052423	shep-RD	150	-11.16	150	-11.16	15370	968	196
FBtr0333287	FBgn0052423	shep-RG	150	-11.16	150	-11.16	15372	927	155
FBtr0333289	FBgn0052423	shep-RI	150	-11.16	150	-11.16	15374	2818	155
FBtr0301599	FBgn0052423	shep-RE	150	-11.16	150	-11.16	15375	927	155
FBtr0340412	FBgn0052647	CG32647-RC	150	-10.1	150	-10.1	15558	3092	2321
FBtr0346126	FBgn0052647	CG32647-RD	150	-10.1	150	-10.1	15559	4829	2321
FBtr0332514	FBgn0053125	CG33125-RC	150	-10.67	150	-10.67	15842	1596	1168
FBtr0301748	FBgn0260970	CG42593-RA	150	-13.33	150	-13.33	18641	1638	376
FBtr0331298	FBgn0260970	CG42593-RB	150	-13.33	150	-13.33	18642	1587	325
FBtr0331299	FBgn0260970	CG42593-RC	150	-13.33	150	-13.33	18643	1638	376
FBtr0111032	FBgn0261552	ps-RK	150	-11.3	150	-11.3	18972	7651	3539
FBtr0302692	FBgn0261552	ps-RN	150	-11.3	150	-11.3	18976	7651	3539
FBtr0344283	FBgn0261552	ps-RS	150	-11.3	150	-11.3	18981	7651	3539
FBtr0307164	FBgn0262730	CG14446-RB	150	-10.97	150	-10.97	19877	4947	577
FBtr0307165	FBgn0262730	CG14446-RC	150	-10.97	150	-10.97	19878	2109	577
FBtr0339696	FBgn0262730	CG14446-RD	150	-10.97	150	-10.97	19879	5161	577
FBtr0339697	FBgn0262730	CG14446-RE	150	-10.97	150	-10.97	19880	1848	316
FBtr0308119	FBgn0010313	corto-RC	150	-10.05	150	-10.05	20251	6594	5875
FBtr0083612	FBgn0011481	Ssdp-RB	150	-12	150	-12	20709	2682	1364
FBtr0330051	FBgn0011481	Ssdp-RD	150	-12	150	-12	20711	2490	1172
FBtr0085467	FBgn0266137	Dop1R2-RA	150	-9.94	150	-9.94	22701	2473	2449
FBtr0085468	FBgn0266137	Dop1R2-RB	150	-9.94	150	-9.94	22702	2641	2617
FBtr0330293	FBgn0266137	Dop1R2-RC	150	-9.94	150	-9.94	22703	1663	1639
FBtr0344445	FBgn0266448	CG45078-RA	150	-11.83	150	-11.83	22813	1310	813
FBtr0305157	FBgn0267336	Glut4EF-RF	150	-9.04	150	-9.04	23077	7576	7468
FBtr0333686	FBgn0267336	Glut4EF-RH	150	-9.04	150	-9.04	23082	7576	7468
FBtr0084000	FBgn0013995	Calx-RC	150	-16	150	-16	23366	1365	707
FBtr0309204	FBgn0013995	Calx-RF	150	-16	150	-16	23369	851	707
FBtr0087296	FBgn0015247	Diap2-RA	150	-13.77	150	-13.77	23608	462	409
FBtr0087297	FBgn0015247	Diap2-RB	150	-13.77	150	-13.77	23609	462	409
FBtr0070582	FBgn0015286	Rala-RB	150	-9.57	150	-9.57	23633	1163	506
FBtr0070583	FBgn0015286	Rala-RA	150	-9.57	150	-9.57	23634	1275	618
FBtr0070584	FBgn0015286	Rala-RC	150	-9.57	150	-9.57	23635	1649	618
FBtr0339652	FBgn0015519	nAChRalpha3-RC	150	-10.19	150	-10.19	23698	6757	5346
FBtr0072066	FBgn0015903	apt-RB	150	-13.36	150	-13.36	23896	999	568
FBtr0072067	FBgn0015903	apt-RD	150	-13.36	150	-13.36	23897	999	568
FBtr0072068	FBgn0015903	apt-RE	150	-13.36	150	-13.36	23898	999	568
FBtr0072069	FBgn0015903	apt-RC	150	-13.36	150	-13.36	23899	999	568
FBtr0072070	FBgn0015903	apt-RA	150	-13.36	150	-13.36	23900	999	568
FBtr0332926	FBgn0015903	apt-RF	150	-13.36	150	-13.36	23901	999	568
FBtr0072202	FBgn0019948	Phm-RB	150	-10.8	150	-10.8	24217	188	74
FBtr0072203	FBgn0019948	Phm-RA	150	-10.8	150	-10.8	24218	352	74
FBtr0080539	FBgn0027844	CAH1-RA	150	-13.59	150	-13.59	26349	340	3
FBtr0077483	FBgn0031589	CG3714-RE	150	-13.24	150	-13.24	29569	602	532
FBtr0334791	FBgn0031589	CG3714-RG	150	-13.24	150	-13.24	29571	602	532
FBtr0079187	FBgn0031770	CG13995-RA	150	-7.92	150	-7.92	29837	1159	636
FBtr0075318	FBgn0000414	Dab-RA	149	-10.13	149	-10.13	424	1234	47
FBtr0305084	FBgn0000414	Dab-RC	149	-10.13	149	-10.13	427	1074	47
FBtr0305085	FBgn0000414	Dab-RD	149	-10.13	149	-10.13	428	1074	47
FBtr0305086	FBgn0000414	Dab-RE	149	-10.13	149	-10.13	429	1074	47
FBtr0333625	FBgn0000414	Dab-RH	149	-10.13	149	-10.13	430	1074	47
FBtr0333626	FBgn0000414	Dab-RI	149	-10.13	149	-10.13	431	1074	47
FBtr0100454	FBgn0001235	hth-RE	149	-8.07	149	-8.07	896	1321	646
FBtr0088068	FBgn0001269	inv-RD	149	-7.61	149	-7.61	932	262	216
FBtr0088069	FBgn0001269	inv-RB	149	-7.61	149	-7.61	933	262	216
FBtr0345673	FBgn0001269	inv-RE	149	-7.61	149	-7.61	934	2777	216
FBtr0329987	FBgn0032911	tadr-RC	149	-11.31	149	-11.31	2826	301	251
FBtr0329988	FBgn0032911	tadr-RD	149	-11.31	149	-11.31	2827	199	149
FBtr0339357	FBgn0033309	CG8735-RB	149	-9.38	149	-9.38	3317	715	274
FBtr0088236	FBgn0033569	CG12942-RA	149	-9.75	149	-9.75	3643	276	135
FBtr0340019	FBgn0034070	SP2353-RB	149	-11.81	149	-11.81	4237	1638	1242
FBtr0310320	FBgn0034317	CG14499-RB	149	-11.83	149	-11.83	4515	669	436
FBtr0072265	FBgn0034997	CG3376-RB	149	-13.19	149	-13.19	5263	864	189
FBtr0273261	FBgn0035290	dsb-RD	149	-11.17	149	-11.17	5668	472	5
FBtr0310544	FBgn0035290	dsb-RF	149	-11.17	149	-11.17	5669	472	5
FBtr0076239	FBgn0036121	CG6310-RA	149	-11.27	149	-11.27	6631	88	28
FBtr0334900	FBgn0037282	CG14657-RC	149	-11.68	149	-11.68	8085	1127	607
FBtr0334901	FBgn0037282	CG14657-RD	149	-11.68	149	-11.68	8086	1784	1559
FBtr0081931	FBgn0037636	CG9821-RB	149	-12.85	149	-12.85	8516	3178	1564
FBtr0334660	FBgn0037636	CG9821-RD	149	-12.85	149	-12.85	8519	3178	1564
FBtr0083607	FBgn0038588	CG7156-RB	149	-11.65	149	-11.65	9588	2120	1283
FBtr0113250	FBgn0038740	CG4562-RB	149	-13.92	149	-13.92	9763	1530	52
FBtr0330035	FBgn0038740	CG4562-RD	149	-13.92	149	-13.92	9765	1530	52
FBtr0308131	FBgn0003345	sd-RM	149	-12.79	149	-12.79	10791	3233	2970
FBtr0346799	FBgn0003345	sd-RU	149	-12.79	149	-12.79	10795	3234	2970
FBtr0336805	FBgn0004509	Fur1-RI	149	-9.28	149	-9.28	11528	2809	2382
FBtr0087056	FBgn0004580	Cbp53E-RA	149	-9.27	149	-9.27	11560	1500	1082
FBtr0085710	FBgn0039805	Cpr100A-RA	149	-10.24	149	-10.24	12578	501	68
FBtr0113374	FBgn0050381	CG30381-RB	149	-12.49	149	-12.49	14234	323	180
FBtr0339129	FBgn0050381	CG30381-RC	149	-12.49	149	-12.49	14235	323	180
FBtr0113395	FBgn0051158	Efa6-RC	149	-8.77	149	-8.77	14507	1170	929
FBtr0113396	FBgn0051158	Efa6-RD	149	-8.77	149	-8.77	14508	1170	929
FBtr0302187	FBgn0051158	Efa6-RG	149	-8.77	149	-8.77	14509	1597	985
FBtr0334559	FBgn0051158	Efa6-RH	149	-8.77	149	-8.77	14510	1173	932
FBtr0334560	FBgn0051158	Efa6-RI	149	-8.77	149	-8.77	14511	2450	2209
FBtr0082312	FBgn0051272	CG31272-RA	149	-14.16	149	-14.16	14588	201	123
FBtr0112367	FBgn0085205	CG34176-RA	149	-13.74	149	-13.74	16686	98	44
FBtr0299705	FBgn0259211	grh-RI	149	-13.6	149	-13.6	17794	739	344
FBtr0299706	FBgn0259211	grh-RJ	149	-13.6	149	-13.6	17795	739	344
FBtr0299707	FBgn0259211	grh-RK	149	-13.6	149	-13.6	17796	739	344
FBtr0300539	FBgn0259211	grh-RL	149	-13.6	149	-13.6	17798	1946	344
FBtr0300541	FBgn0259211	grh-RN	149	-13.6	149	-13.6	17799	654	344
FBtr0306625	FBgn0259211	grh-RO	149	-13.6	149	-13.6	17800	654	344
FBtr0345791	FBgn0259211	grh-RP	149	-13.6	149	-13.6	17801	739	344
FBtr0333742	FBgn0261802	CG42748-RJ	149	-14.62	149	-14.62	19297	867	562
FBtr0333745	FBgn0261802	CG42748-RM	149	-14.62	149	-14.62	19300	1122	817
FBtr0303271	FBgn0261802	CG42748-RB	149	-14.62	149	-14.62	19301	867	562
FBtr0303272	FBgn0261802	CG42748-RC	149	-14.62	149	-14.62	19302	867	562
FBtr0303274	FBgn0261802	CG42748-RE	149	-14.62	149	-14.62	19304	2604	562
FBtr0303751	FBgn0261934	dikar-RE	149	-8.48	149	-8.48	19453	1734	391
FBtr0304890	FBgn0262567	CG43107-RA	149	-11.76	149	-11.76	19758	135	70
FBtr0088469	FBgn0010316	dap-RA	149	-10.02	149	-10.02	20257	1173	257
FBtr0304614	FBgn0010905	Spn-RC	149	-10.4	149	-10.4	20535	3062	2721
FBtr0304619	FBgn0010905	Spn-RH	149	-10.4	149	-10.4	20540	3062	2721
FBtr0310672	FBgn0013334	Sap47-RJ	149	-13.25	149	-13.25	21015	1294	1025
FBtr0307306	FBgn0263108	BtbVII-RF	149	-15.29	149	-15.29	21177	822	524
FBtr0332604	FBgn0264449	CG43867-RC	149	-10.82	149	-10.82	21951	1481	158
FBtr0332605	FBgn0264449	CG43867-RI	149	-10.82	149	-10.82	21952	1481	158
FBtr0332606	FBgn0264449	CG43867-RH	149	-10.82	149	-10.82	21953	1481	158
FBtr0332609	FBgn0264449	CG43867-RD	149	-10.82	149	-10.82	21954	1481	158
FBtr0332610	FBgn0264449	CG43867-RF	149	-10.82	149	-10.82	21955	1481	158
FBtr0332611	FBgn0264449	CG43867-RB	149	-10.82	149	-10.82	21956	1481	158
FBtr0332612	FBgn0264449	CG43867-RA	149	-10.82	149	-10.82	21957	1481	158
FBtr0343358	FBgn0264449	CG43867-RJ	149	-10.82	149	-10.82	21958	1481	158
FBtr0343359	FBgn0264449	CG43867-RK	149	-10.82	149	-10.82	21959	1481	158
FBtr0343360	FBgn0264449	CG43867-RL	149	-10.82	149	-10.82	21960	1481	158
FBtr0305217	FBgn0015371	chn-RI	149	-12.05	149	-12.05	23670	2408	1251
FBtr0077131	FBgn0015766	Msr-110-RA	149	-10.2	149	-10.2	23820	662	306
FBtr0077132	FBgn0015766	Msr-110-RB	149	-10.2	149	-10.2	23821	662	306
FBtr0077133	FBgn0015766	Msr-110-RC	149	-10.2	149	-10.2	23822	662	306
FBtr0345001	FBgn0015766	Msr-110-RD	149	-10.2	149	-10.2	23823	662	306
FBtr0088566	FBgn0015838	Vang-RA	149	-11.3	149	-11.3	23887	1408	893
FBtr0330624	FBgn0015838	Vang-RB	149	-11.3	149	-11.3	23888	1327	812
FBtr0339509	FBgn0019650	toy-RC	149	-9.63	149	-9.63	24185	1762	1708
FBtr0339537	FBgn0022986	qkr58E-1-RC	149	-9.31	149	-9.31	24719	925	904
FBtr0081892	FBgn0024326	Mkk4-RA	149	-14.37	149	-14.37	25026	1138	544
FBtr0300443	FBgn0024326	Mkk4-RB	149	-14.37	149	-14.37	25027	965	544
FBtr0334320	FBgn0024326	Mkk4-RC	149	-14.37	149	-14.37	25028	2550	544
FBtr0072504	FBgn0027111	miple-RA	149	-11.29	149	-11.29	25973	1217	973
FBtr0072505	FBgn0027111	miple-RB	149	-11.29	149	-11.29	25974	1217	973
FBtr0310416	FBgn0027111	miple-RC	149	-11.29	149	-11.29	25975	1217	973
FBtr0070424	FBgn0029603	CG14053-RA	149	-10.65	149	-10.65	27088	327	207
FBtr0331383	FBgn0029603	CG14053-RB	149	-10.65	149	-10.65	27089	639	207
FBtr0331603	FBgn0029761	SK-RP	149	-9.93	149	-9.93	27230	4507	2668
FBtr0301953	FBgn0029761	SK-RM	149	-9.93	149	-9.93	27236	5441	2668
FBtr0344556	FBgn0029761	SK-RS	149	-9.93	149	-9.93	27239	3922	2083
FBtr0071254	FBgn0030065	CG12075-RB	149	-12.78	149	-12.78	27637	894	401
FBtr0307271	FBgn0030065	CG12075-RC	149	-12.78	149	-12.78	27638	894	401
FBtr0335034	FBgn0030065	CG12075-RD	149	-12.78	149	-12.78	27639	894	401
FBtr0335035	FBgn0030065	CG12075-RE	149	-12.78	149	-12.78	27640	894	401
FBtr0073456	FBgn0030294	Pa1-RA	149	-12.47	149	-12.47	27870	1166	897
FBtr0339676	FBgn0030451	CG15717-RC	149	-14.79	149	-14.79	28071	2486	271
FBtr0305899	FBgn0030790	CG4768-RB	149	-12.12	149	-12.12	28537	1438	1064
FBtr0347029	FBgn0030790	CG4768-RC	149	-12.12	149	-12.12	28538	2424	1064
FBtr0333716	FBgn0031194	CG17598-RB	149	-12.42	149	-12.42	29084	2030	1500
FBtr0300674	FBgn0032682	CG10176-RB	148	-11.75	148	-11.75	2513	512	294
FBtr0332321	FBgn0032682	CG10176-RC	148	-11.75	148	-11.75	2514	823	294
FBtr0081110	FBgn0032719	CG17321-RA	148	-6.9	148	-6.9	2562	606	575
FBtr0342919	FBgn0032719	CG17321-RB	148	-6.9	148	-6.9	2563	606	575
FBtr0081248	FBgn0032800	CG10137-RA	148	-9.57	148	-9.57	2671	315	118
FBtr0087645	FBgn0033876	Syngr-RA	148	-9.52	148	-9.52	3996	1523	405
FBtr0087353	FBgn0034032	CG8195-RA	148	-12.64	148	-12.64	4192	467	211
FBtr0073035	FBgn0035411	Girdin-RA	148	-14.65	148	-14.65	5801	621	254
FBtr0073036	FBgn0035411	Girdin-RB	148	-14.65	148	-14.65	5802	1016	649
FBtr0332097	FBgn0035411	Girdin-RC	148	-14.65	148	-14.65	5803	621	254
FBtr0332098	FBgn0035411	Girdin-RD	148	-14.65	148	-14.65	5804	1016	649
FBtr0332099	FBgn0035411	Girdin-RE	148	-14.65	148	-14.65	5805	621	254
FBtr0076114	FBgn0036199	Bmcp-RA	148	-11.95	148	-11.95	6731	515	440
FBtr0075567	FBgn0036518	RhoGAP71E-RB	148	-10.96	148	-10.96	7111	419	288
FBtr0075568	FBgn0036518	RhoGAP71E-RA	148	-10.96	148	-10.96	7112	562	431
FBtr0334057	FBgn0036808	Dic4-RC	148	-17.46	148	-17.46	7452	761	376
FBtr0345390	FBgn0036862	Gbs-76A-RD	148	-11.25	148	-11.25	7531	1859	1612
FBtr0078961	FBgn0037213	CG12581-RB	148	-11.14	148	-11.14	8002	2702	2036
FBtr0089688	FBgn0037222	CG14642-RA	148	-14.54	148	-14.54	8017	719	623
FBtr0309258	FBgn0037222	CG14642-RC	148	-14.54	148	-14.54	8018	104	8
FBtr0089360	FBgn0005630	lola-RJ	148	-8.6	148	-8.6	11992	884	282
FBtr0085607	FBgn0039732	CG15525-RA	148	-9.81	148	-9.81	12462	66	1
FBtr0300344	FBgn0039908	Asator-RF	148	-9.09	148	-9.09	12726	2340	1207
FBtr0332632	FBgn0040010	CG17493-RD	148	-12.15	148	-12.15	12849	5188	4795
FBtr0342727	FBgn0040362	CG11379-RB	148	-9.29	148	-9.29	13074	682	266
FBtr0070655	FBgn0040907	mRpL33-RA	148	-10.57	148	-10.57	13358	54	22
FBtr0308126	FBgn0051774	fred-RG	148	-13.25	148	-13.25	14940	779	125
FBtr0078533	FBgn0052451	SPoCk-RB	148	-9.91	148	-9.91	15410	2637	905
FBtr0110850	FBgn0052699	CG32699-RB	148	-11.17	148	-11.17	15620	1471	342
FBtr0074546	FBgn0083228	Frq2-RA	148	-14.23	148	-14.23	16579	1379	582
FBtr0301627	FBgn0083228	Frq2-RB	148	-14.23	148	-14.23	16580	1379	582
FBtr0301628	FBgn0083228	Frq2-RC	148	-14.23	148	-14.23	16581	2948	582
FBtr0333321	FBgn0083228	Frq2-RD	148	-14.23	148	-14.23	16582	2948	582
FBtr0112596	FBgn0085400	CG34371-RA	148	-7.56	148	-7.56	16909	1515	394
FBtr0330239	FBgn0085400	CG34371-RB	148	-7.56	148	-7.56	16910	1413	292
FBtr0112612	FBgn0085407	Pvf3-RA	148	-10.32	148	-10.32	16917	1905	1121
FBtr0342658	FBgn0085407	Pvf3-RF	148	-10.32	148	-10.32	16919	1905	1121
FBtr0310062	FBgn0260964	Vmat-RF	148	-13.38	148	-13.38	18632	4936	682
FBtr0091491	FBgn0260964	Vmat-RE	148	-13.38	148	-13.38	18633	4936	682
FBtr0340553	FBgn0261871	dpr2-RF	148	-10.76	148	-10.76	19401	735	586
FBtr0305205	FBgn0262593	Shab-RH	148	-10.01	148	-10.01	19793	2219	413
FBtr0305206	FBgn0262593	Shab-RI	148	-10.01	148	-10.01	19794	2046	240
FBtr0333898	FBgn0262593	Shab-RM	148	-10.01	148	-10.01	19798	2046	240
FBtr0333899	FBgn0262593	Shab-RN	148	-10.01	148	-10.01	19799	2046	240
FBtr0081160	FBgn0010300	brat-RC	148	-10.56	148	-10.56	20238	8499	4963
FBtr0308620	FBgn0263289	scrib-RA	148	-9.45	148	-9.45	21335	1373	259
FBtr0308621	FBgn0263289	scrib-RB	148	-9.45	148	-9.45	21336	1373	259
FBtr0308625	FBgn0263289	scrib-RD	148	-9.45	148	-9.45	21340	1373	259
FBtr0335522	FBgn0263289	scrib-RU	148	-9.45	148	-9.45	21352	1373	259
FBtr0076583	FBgn0263930	dally-RA	148	-14.62	148	-14.62	21616	835	372
FBtr0305901	FBgn0263930	dally-RB	148	-14.62	148	-14.62	21617	1874	372
FBtr0301634	FBgn0264493	rdx-RC	148	-12.76	148	-12.76	22003	1231	2
FBtr0301632	FBgn0264493	rdx-RA	148	-12.76	148	-12.76	22004	1231	2
FBtr0301633	FBgn0264493	rdx-RB	148	-12.76	148	-12.76	22005	561	2
FBtr0100361	FBgn0264493	rdx-RE	148	-12.76	148	-12.76	22006	1231	2
FBtr0334298	FBgn0264493	rdx-RF	148	-12.76	148	-12.76	22007	2125	2
FBtr0334284	FBgn0264753	Rgk1-RC	148	-14.2	148	-14.2	22175	1449	983
FBtr0089488	FBgn0264855	AP-2alpha-RA	148	-11.99	148	-11.99	22204	1358	1265
FBtr0306601	FBgn0265487	mbl-RH	148	-11.33	148	-11.33	22488	1400	1326
FBtr0306603	FBgn0265487	mbl-RJ	148	-11.33	148	-11.33	22489	1400	1326
FBtr0306604	FBgn0265487	mbl-RK	148	-11.33	148	-11.33	22490	1400	1326
FBtr0306606	FBgn0265487	mbl-RM	148	-11.33	148	-11.33	22491	1400	1326
FBtr0336940	FBgn0265487	mbl-RR	148	-11.33	148	-11.33	22495	1400	1326
FBtr0336941	FBgn0265487	mbl-RS	148	-11.33	148	-11.33	22496	1400	1326
FBtr0336942	FBgn0265487	mbl-RT	148	-11.33	148	-11.33	22497	1400	1326
FBtr0300118	FBgn0266347	nAChRalpha4-RC	148	-10.98	148	-10.98	22729	3518	3448
FBtr0308330	FBgn0266347	nAChRalpha4-RD	148	-10.98	148	-10.98	22730	3518	3448
FBtr0346707	FBgn0266347	nAChRalpha4-RH	148	-10.98	148	-10.98	22734	3518	3448
FBtr0084801	FBgn0020626	Osbp-RA	148	-13.37	148	-13.37	24488	530	89
FBtr0113713	FBgn0020908	Scp1-RA	148	-11.22	148	-11.22	24529	341	24
FBtr0334933	FBgn0020908	Scp1-RB	148	-11.22	148	-11.22	24530	514	24
FBtr0088438	FBgn0022382	Pka-R2-RB	148	-9.62	148	-9.62	24660	2601	1626
FBtr0345601	FBgn0024236	foi-RD	148	-9.88	148	-9.88	24973	1398	1276
FBtr0077001	FBgn0024921	Trn-RB	148	-14.39	148	-14.39	25140	1875	1388
FBtr0077002	FBgn0024921	Trn-RC	148	-14.39	148	-14.39	25141	1875	1388
FBtr0110845	FBgn0026197	noe-RC	148	-12.64	148	-12.64	25640	619	527
FBtr0078043	FBgn0026438	Eaat2-RA	148	-9.66	148	-9.66	25786	862	640
FBtr0301316	FBgn0026438	Eaat2-RC	148	-9.66	148	-9.66	25787	862	640
FBtr0301317	FBgn0026438	Eaat2-RD	148	-9.66	148	-9.66	25788	862	640
FBtr0301652	FBgn0028397	Tob-RC	148	-9.88	148	-9.88	26461	5103	1198
FBtr0310446	FBgn0028397	Tob-RF	148	-9.88	148	-9.88	26463	1933	1198
FBtr0085385	FBgn0028692	Rpn2-RA	148	-8.75	148	-8.75	26721	142	59
FBtr0330379	FBgn0028692	Rpn2-RB	148	-8.75	148	-8.75	26722	115	32
FBtr0334532	FBgn0028692	Rpn2-RC	148	-8.75	148	-8.75	26723	142	59
FBtr0080624	FBgn0028916	CG33090-RB	148	-9.08	148	-9.08	26866	450	265
FBtr0343673	FBgn0028916	CG33090-RC	148	-9.08	148	-9.08	26867	455	265
FBtr0343674	FBgn0028916	CG33090-RD	148	-9.08	148	-9.08	26868	450	265
FBtr0343675	FBgn0028916	CG33090-RE	148	-9.08	148	-9.08	26869	455	265
FBtr0070968	FBgn0029903	pod1-RE	148	-10.76	148	-10.76	27434	2258	850
FBtr0070964	FBgn0029903	pod1-RA	148	-10.76	148	-10.76	27435	2258	850
FBtr0070965	FBgn0029903	pod1-RB	148	-10.76	148	-10.76	27436	2258	850
FBtr0070966	FBgn0029903	pod1-RC	148	-10.76	148	-10.76	27437	2258	850
FBtr0070967	FBgn0029903	pod1-RD	148	-10.76	148	-10.76	27438	2258	850
FBtr0112956	FBgn0029903	pod1-RF	148	-10.76	148	-10.76	27439	1948	850
FBtr0308228	FBgn0029903	pod1-RG	148	-10.76	148	-10.76	27440	2258	850
FBtr0073840	FBgn0030520	Pdcd4-RA	148	-15.08	148	-15.08	28167	136	55
FBtr0112981	FBgn0030520	Pdcd4-RB	148	-15.08	148	-15.08	28168	1199	55
FBtr0331711	FBgn0030520	Pdcd4-RC	148	-15.08	148	-15.08	28169	1199	55
FBtr0331712	FBgn0030520	Pdcd4-RD	148	-15.08	148	-15.08	28170	1199	55
FBtr0110968	FBgn0030608	Lsd-2-RB	148	-13.53	148	-13.53	28262	809	728
FBtr0073967	FBgn0030608	Lsd-2-RA	148	-13.53	148	-13.53	28263	809	728
FBtr0340427	FBgn0030608	Lsd-2-RD	148	-13.53	148	-13.53	28264	1042	961
FBtr0340428	FBgn0030608	Lsd-2-RE	148	-13.53	148	-13.53	28265	1042	961
FBtr0346060	FBgn0030608	Lsd-2-RF	148	-13.53	148	-13.53	28266	3310	961
FBtr0084994	FBgn0000064	Ald-RB	147	-7.47	147	-7.47	91	1273	224
FBtr0339614	FBgn0000064	Ald-RM	147	-7.47	147	-7.47	100	739	224
FBtr0070439	FBgn0001404	egh-RC	147	-11.95	147	-11.95	985	728	426
FBtr0070440	FBgn0001404	egh-RB	147	-11.95	147	-11.95	986	1212	426
FBtr0340091	FBgn0001404	egh-RD	147	-11.95	147	-11.95	987	728	426
FBtr0079175	FBgn0001942	eIF-4a-RA	147	-15.21	147	-15.21	1015	409	8
FBtr0079176	FBgn0001942	eIF-4a-RC	147	-15.21	147	-15.21	1016	271	8
FBtr0079177	FBgn0001942	eIF-4a-RB	147	-15.21	147	-15.21	1017	409	8
FBtr0079178	FBgn0001942	eIF-4a-RD	147	-15.21	147	-15.21	1018	291	8
FBtr0307068	FBgn0001942	eIF-4a-RE	147	-15.21	147	-15.21	1019	739	8
FBtr0331201	FBgn0001942	eIF-4a-RF	147	-15.21	147	-15.21	1020	501	8
FBtr0308328	FBgn0002873	mud-RI	147	-11.81	147	-11.81	1292	1913	599
FBtr0079604	FBgn0032023	CG14274-RA	147	-9.72	147	-9.72	1744	891	749
FBtr0081416	FBgn0032886	CG9328-RA	147	-12.08	147	-12.08	2780	619	479
FBtr0086883	FBgn0034269	CG6406-RB	147	-9.41	147	-9.41	4460	897	48
FBtr0086884	FBgn0034269	CG6406-RA	147	-9.41	147	-9.41	4461	897	48
FBtr0071521	FBgn0034566	CG9313-RA	147	-6.99	147	-6.99	4812	244	221
FBtr0345666	FBgn0034566	CG9313-RC	147	-6.99	147	-6.99	4813	244	221
FBtr0342788	FBgn0034566	CG9313-RB	147	-6.99	147	-6.99	4814	244	221
FBtr0301162	FBgn0034911	CG5549-RB	147	-9.55	147	-9.55	5169	2524	510
FBtr0072252	FBgn0034978	CG3257-RA	147	-9.55	147	-9.55	5248	1261	30
FBtr0073124	FBgn0035398	Cht7-RA	147	-9.6	147	-9.6	5784	629	252
FBtr0073063	FBgn0035436	CG12016-RA	147	-13.09	147	-13.09	5852	773	368
FBtr0073064	FBgn0035436	CG12016-RB	147	-13.09	147	-13.09	5853	773	368
FBtr0077098	FBgn0035631	Txl-RA	147	-10.76	147	-10.76	6079	95	54
FBtr0076986	FBgn0035704	CG10144-RA	147	-9.97	147	-9.97	6144	88	36
FBtr0076517	FBgn0035947	Srp68-RA	147	-11.99	147	-11.99	6429	239	159
FBtr0075182	FBgn0036741	CG7510-RA	147	-14.83	147	-14.83	7366	494	349
FBtr0333121	FBgn0036741	CG7510-RB	147	-14.83	147	-14.83	7367	985	349
FBtr0078277	FBgn0037021	CG11399-RB	147	-12.55	147	-12.55	7748	1308	232
FBtr0301649	FBgn0037502	wa-cup-RB	147	-10.75	147	-10.75	8343	45	15
FBtr0302311	FBgn0038001	CG17404-RB	147	-7.82	147	-7.82	8945	72	51
FBtr0302902	FBgn0003380	Sh-RI	147	-10.38	147	-10.38	10842	2466	1184
FBtr0086577	FBgn0004168	5-HT1A-RB	147	-10.87	147	-10.87	11336	1458	737
FBtr0085108	FBgn0039489	CG5880-RA	147	-7.99	147	-7.99	12190	242	219
FBtr0085573	FBgn0039754	CG9747-RA	147	-9.34	147	-9.34	12495	421	329
FBtr0346162	FBgn0039754	CG9747-RB	147	-9.34	147	-9.34	12496	421	329
FBtr0335408	FBgn0039831	CG12054-RE	147	-8.73	147	-8.73	12608	2135	1360
FBtr0083099	FBgn0041188	Atx2-RB	147	-9.15	147	-9.15	13477	576	378
FBtr0083100	FBgn0041188	Atx2-RC	147	-9.15	147	-9.15	13478	1725	378
FBtr0083101	FBgn0041188	Atx2-RA	147	-9.15	147	-9.15	13479	1454	912
FBtr0344377	FBgn0041188	Atx2-RD	147	-9.15	147	-9.15	13480	1725	378
FBtr0300762	FBgn0046294	CG12699-RB	147	-11.6	147	-11.6	13934	255	40
FBtr0310423	FBgn0050389	CG30389-RD	147	-9.56	147	-9.56	14245	1076	968
FBtr0081541	FBgn0051146	Nlg1-RD	147	-9.83	147	-9.83	14496	1174	779
FBtr0305969	FBgn0051146	Nlg1-RE	147	-9.83	147	-9.83	14497	1174	779
FBtr0307339	FBgn0051323	CG31323-RB	147	-11.39	147	-11.39	14615	362	273
FBtr0076783	FBgn0052369	CG32369-RA	147	-9.53	147	-9.53	15342	618	249
FBtr0304992	FBgn0052369	CG32369-RC	147	-9.53	147	-9.53	15343	1365	249
FBtr0074793	FBgn0052528	parvin-RA	147	-8.36	147	-8.36	15467	588	157
FBtr0346042	FBgn0052528	parvin-RB	147	-8.36	147	-8.36	15468	588	157
FBtr0300475	FBgn0053100	4EHP-RB	147	-14.71	147	-14.71	15809	1201	851
FBtr0303159	FBgn0053100	4EHP-RC	147	-14.71	147	-14.71	15810	3525	286
FBtr0347211	FBgn0053208	Mical-RN	147	-11.03	147	-11.03	15956	6236	1675
FBtr0306735	FBgn0085384	CG34355-RE	147	-10.7	147	-10.7	16871	2204	1146
FBtr0273215	FBgn0085384	CG34355-RB	147	-10.7	147	-10.7	16872	2204	1146
FBtr0345324	FBgn0085384	CG34355-RF	147	-10.7	147	-10.7	16873	2204	1146
FBtr0340087	FBgn0259228	C3G-RL	147	-14.47	147	-14.47	17865	1564	109
FBtr0299791	FBgn0259228	C3G-RC	147	-14.47	147	-14.47	17866	1564	109
FBtr0299792	FBgn0259228	C3G-RD	147	-14.47	147	-14.47	17867	938	109
FBtr0299793	FBgn0259228	C3G-RE	147	-14.47	147	-14.47	17868	938	109
FBtr0299794	FBgn0259228	C3G-RF	147	-14.47	147	-14.47	17869	938	109
FBtr0299795	FBgn0259228	C3G-RG	147	-14.47	147	-14.47	17870	938	109
FBtr0300526	FBgn0259228	C3G-RH	147	-14.47	147	-14.47	17871	938	109
FBtr0334967	FBgn0259228	C3G-RI	147	-14.47	147	-14.47	17872	938	109
FBtr0334968	FBgn0259228	C3G-RJ	147	-14.47	147	-14.47	17873	938	109
FBtr0334969	FBgn0259228	C3G-RK	147	-14.47	147	-14.47	17874	938	109
FBtr0300240	FBgn0259933	CG42456-RA	147	-13.09	147	-13.09	18123	1838	1433
FBtr0344335	FBgn0260634	eIF4G2-RC	147	-9.58	147	-9.58	18387	2009	1269
FBtr0081479	FBgn0261239	Hr39-RB	147	-8.65	147	-8.65	18741	1846	751
FBtr0081481	FBgn0261239	Hr39-RD	147	-8.65	147	-8.65	18743	1846	751
FBtr0077806	FBgn0011832	Ser12-RA	147	-12.24	147	-12.24	20940	102	8
FBtr0301513	FBgn0264962	Inr-a-RB	147	-9.43	147	-9.43	22268	692	535
FBtr0089898	FBgn0265298	SC35-RA	147	-12.67	147	-12.67	22442	363	139
FBtr0089899	FBgn0265298	SC35-RB	147	-12.67	147	-12.67	22443	363	139
FBtr0306252	FBgn0265298	SC35-RD	147	-12.67	147	-12.67	22445	1166	139
FBtr0310058	FBgn0265487	mbl-RN	147	-8.98	147	-8.98	22492	4606	1138
FBtr0310059	FBgn0265487	mbl-RO	147	-8.98	147	-8.98	22493	4606	1138
FBtr0310346	FBgn0265487	mbl-RP	147	-8.98	147	-8.98	22494	4606	1138
FBtr0076846	FBgn0019662	qm-RA	147	-10.8	147	-10.8	24186	620	456
FBtr0302045	FBgn0019662	qm-RB	147	-10.8	147	-10.8	24187	1229	1065
FBtr0332729	FBgn0019662	qm-RC	147	-10.8	147	-10.8	24188	1229	1065
FBtr0332859	FBgn0019985	mGluR-RC	147	-10.1	147	-10.1	24239	1208	78
FBtr0080863	FBgn0020414	Idgf3-RB	147	-10.85	147	-10.85	24390	1689	972
FBtr0305992	FBgn0022959	yps-RB	147	-9.29	147	-9.29	24707	1390	145
FBtr0071358	FBgn0026149	BCL7-like-RA	147	-8.59	147	-8.59	25611	913	398
FBtr0334695	FBgn0026441	ear-RC	147	-9.32	147	-9.32	25795	995	597
FBtr0071470	FBgn0028331	l(1)G0289-RA	147	-8.99	147	-8.99	26396	916	369
FBtr0347009	FBgn0028331	l(1)G0289-RC	147	-8.99	147	-8.99	26398	1553	369
FBtr0309871	FBgn0030082	HP1b-RC	147	-10.2	147	-10.2	27656	665	355
FBtr0071423	FBgn0030174	CG15312-RC	147	-14.42	147	-14.42	27745	1615	196
FBtr0309219	FBgn0030174	CG15312-RD	147	-14.42	147	-14.42	27747	1220	248
FBtr0309220	FBgn0030174	CG15312-RE	147	-14.42	147	-14.42	27748	1667	248
FBtr0074487	FBgn0030850	stas-RA	147	-12.81	147	-12.81	28628	474	184
FBtr0079096	FBgn0031711	CG6907-RA	147	-14.54	147	-14.54	29730	86	30
FBtr0343257	FBgn0031711	CG6907-RB	147	-14.54	147	-14.54	29731	86	30
FBtr0070265	FBgn0000210	br-RA	146	-9.95	146	-9.95	226	5267	1495
FBtr0079860	FBgn0032129	jp-RB	146	-10.53	146	-10.53	1877	1859	883
FBtr0079861	FBgn0032129	jp-RA	146	-10.53	146	-10.53	1878	1321	883
FBtr0113030	FBgn0032129	jp-RC	146	-10.53	146	-10.53	1879	1321	883
FBtr0304057	FBgn0032129	jp-RE	146	-10.53	146	-10.53	1881	1321	883
FBtr0334168	FBgn0032986	CG3262-RE	146	-11.45	146	-11.45	2911	6125	3696
FBtr0342988	FBgn0034722	Rtf1-RB	146	-11.79	146	-11.79	4978	731	464
FBtr0075437	FBgn0036560	CG5895-RA	146	-11.75	146	-11.75	7157	65	45
FBtr0333614	FBgn0036560	CG5895-RC	146	-11.75	146	-11.75	7158	65	45
FBtr0075326	FBgn0036662	CG9706-RA	146	-10.32	146	-10.32	7261	195	49
FBtr0075327	FBgn0036662	CG9706-RB	146	-10.32	146	-10.32	7262	195	49
FBtr0084522	FBgn0039126	CG13601-RA	146	-11.05	146	-11.05	10203	257	216
FBtr0330369	FBgn0039126	CG13601-RB	146	-11.05	146	-11.05	10204	191	150
FBtr0084555	FBgn0039165	CG6204-RA	146	-8.66	146	-8.66	10267	29	1
FBtr0089964	FBgn0003721	Tm1-RG	146	-11.67	146	-11.67	11141	1104	410
FBtr0100472	FBgn0004575	Syn-RE	146	-11.28	146	-11.28	11553	3631	2884
FBtr0089477	FBgn0004575	Syn-RA	146	-11.28	146	-11.28	11554	3631	2884
FBtr0089475	FBgn0004575	Syn-RF	146	-11.28	146	-11.28	11555	2299	1552
FBtr0100471	FBgn0004575	Syn-RD	146	-11.28	146	-11.28	11556	2299	1552
FBtr0070441	FBgn0004643	Zw10-RB	146	-9.19	146	-9.19	11634	295	267
FBtr0083644	FBgn0004652	fru-RF	146	-9.62	146	-9.62	11667	2504	2099
FBtr0344120	FBgn0039431	plum-RE	146	-12.24	146	-12.24	12119	1876	1582
FBtr0302209	FBgn0039431	plum-RB	146	-12.24	146	-12.24	12120	1876	1582
FBtr0302210	FBgn0039431	plum-RC	146	-12.24	146	-12.24	12121	1876	1582
FBtr0081562	FBgn0040670	e(y)2b-RA	146	-8.24	146	-8.24	13239	185	153
FBtr0344948	FBgn0040670	e(y)2b-RB	146	-8.24	146	-8.24	13240	185	153
FBtr0332635	FBgn0041775	tral-RB	146	-10.44	146	-10.44	13580	1803	779
FBtr0332637	FBgn0041775	tral-RD	146	-10.44	146	-10.44	13582	1803	779
FBtr0071614	FBgn0050394	CG30394-RA	146	-14.01	146	-14.01	14252	121	1
FBtr0071613	FBgn0050394	CG30394-RB	146	-14.01	146	-14.01	14253	121	1
FBtr0081747	FBgn0051472	sgll-RA	146	-12.66	146	-12.66	14716	376	105
FBtr0081748	FBgn0051472	sgll-RB	146	-12.66	146	-12.66	14717	376	105
FBtr0340670	FBgn0052758	CG32758-RD	146	-9.25	146	-9.25	15649	2254	2170
FBtr0302909	FBgn0053639	CG33639-RC	146	-11.62	146	-11.62	16153	2262	301
FBtr0332379	FBgn0053639	CG33639-RD	146	-11.62	146	-11.62	16154	2192	231
FBtr0110783	FBgn0083940	RhoU-RB	146	-12.68	146	-12.68	16587	428	299
FBtr0343017	FBgn0083940	RhoU-RC	146	-12.68	146	-12.68	16588	428	299
FBtr0112383	FBgn0085219	CG34190-RA	146	-13.65	146	-13.65	16701	750	459
FBtr0112428	FBgn0085263	CG34234-RA	146	-12.02	146	-12.02	16745	217	142
FBtr0329979	FBgn0085409	CG34380-RD	146	-11.57	146	-11.57	16925	2087	1681
FBtr0329980	FBgn0085409	CG34380-RE	146	-11.57	146	-11.57	16926	2588	2182
FBtr0305613	FBgn0259823	CG42404-RD	146	-10.19	146	-10.19	18087	1400	559
FBtr0305614	FBgn0259823	CG42404-RE	146	-10.19	146	-10.19	18088	2098	559
FBtr0345173	FBgn0259823	CG42404-RF	146	-10.19	146	-10.19	18089	5195	3656
FBtr0307173	FBgn0260400	elav-RD	146	-13.6	146	-13.6	18285	8557	980
FBtr0310006	FBgn0260943	Rbp6-RF	146	-13.51	146	-13.51	18611	3377	2470
FBtr0070249	FBgn0261444	CG3638-RB	146	-11.42	146	-11.42	18867	5746	4102
FBtr0330206	FBgn0261444	CG3638-RH	146	-11.42	146	-11.42	18869	2622	2347
FBtr0330207	FBgn0261444	CG3638-RI	146	-11.42	146	-11.42	18870	4377	4102
FBtr0336978	FBgn0261444	CG3638-RJ	146	-11.42	146	-11.42	18872	6171	4102
FBtr0346960	FBgn0261444	CG3638-RK	146	-11.42	146	-11.42	18873	4377	4102
FBtr0303836	FBgn0262018	CadN2-RC	146	-8.82	146	-8.82	19512	1334	1035
FBtr0308770	FBgn0262018	CadN2-RD	146	-8.82	146	-8.82	19513	1334	1035
FBtr0332368	FBgn0262359	CG43057-RB	146	-12.23	146	-12.23	19625	190	146
FBtr0082569	FBgn0010038	GstD2-RA	146	-10.91	146	-10.91	20121	59	1
FBtr0076262	FBgn0010762	simj-RB	146	-11.49	146	-11.49	20503	193	57
FBtr0076263	FBgn0010762	simj-RA	146	-11.49	146	-11.49	20504	193	57
FBtr0076264	FBgn0010762	simj-RC	146	-11.49	146	-11.49	20505	193	57
FBtr0331573	FBgn0010762	simj-RD	146	-11.49	146	-11.49	20506	193	57
FBtr0331574	FBgn0010762	simj-RE	146	-11.49	146	-11.49	20507	1624	57
FBtr0076754	FBgn0011817	nmo-RA	146	-14.91	146	-14.91	20916	3168	576
FBtr0076755	FBgn0011817	nmo-RB	146	-14.91	146	-14.91	20917	832	576
FBtr0076756	FBgn0011817	nmo-RE	146	-14.91	146	-14.91	20918	410	154
FBtr0076757	FBgn0011817	nmo-RC	146	-14.91	146	-14.91	20919	832	576
FBtr0076758	FBgn0011817	nmo-RF	146	-14.91	146	-14.91	20920	410	154
FBtr0076759	FBgn0011817	nmo-RG	146	-14.91	146	-14.91	20921	410	154
FBtr0306920	FBgn0263078	CG43339-RB	146	-9.68	146	-9.68	21143	135	69
FBtr0343810	FBgn0263078	CG43339-RC	146	-9.68	146	-9.68	21144	178	69
FBtr0309276	FBgn0263456	nwk-RB	146	-9.37	146	-9.37	21451	1363	720
FBtr0309278	FBgn0263456	nwk-RD	146	-9.37	146	-9.37	21453	1363	720
FBtr0309280	FBgn0263456	nwk-RF	146	-9.37	146	-9.37	21454	2637	1994
FBtr0344238	FBgn0263456	nwk-RH	146	-9.37	146	-9.37	21455	1243	600
FBtr0344239	FBgn0263456	nwk-RI	146	-9.37	146	-9.37	21456	1243	600
FBtr0344240	FBgn0263456	nwk-RJ	146	-9.37	146	-9.37	21457	1243	600
FBtr0344241	FBgn0263456	nwk-RK	146	-9.37	146	-9.37	21458	1363	720
FBtr0344242	FBgn0263456	nwk-RL	146	-9.37	146	-9.37	21459	1243	600
FBtr0331857	FBgn0263456	nwk-RG	146	-9.37	146	-9.37	21460	1363	720
FBtr0333501	FBgn0264574	Glut1-RP	146	-8.31	146	-8.31	22054	2642	1318
FBtr0333526	FBgn0264598	PsGEF-RA	146	-14.42	146	-14.42	22065	2117	1768
FBtr0333528	FBgn0264598	PsGEF-RC	146	-14.42	146	-14.42	22067	2117	1768
FBtr0084703	FBgn0013953	Esp-RA	146	-13.24	146	-13.24	23345	179	102
FBtr0304054	FBgn0013953	Esp-RB	146	-13.24	146	-13.24	23346	179	102
FBtr0335492	FBgn0014179	gcm-RB	146	-10.27	146	-10.27	23462	505	364
FBtr0083847	FBgn0021776	mira-RA	146	-7.65	146	-7.65	24566	150	2
FBtr0083848	FBgn0021776	mira-RB	146	-7.65	146	-7.65	24567	385	2
FBtr0335243	FBgn0021776	mira-RC	146	-7.65	146	-7.65	24568	150	2
FBtr0333347	FBgn0028703	Nhe3-RI	146	-10.01	146	-10.01	26744	602	563
FBtr0305563	FBgn0028858	CG10839-RB	146	-12.74	146	-12.74	26807	665	241
FBtr0070858	FBgn0029824	CG3726-RA	146	-13.05	146	-13.05	27307	301	209
FBtr0343051	FBgn0029824	CG3726-RB	146	-13.05	146	-13.05	27308	448	168
FBtr0343052	FBgn0029825	CG12728-RB	146	-13.05	146	-13.05	27310	863	827
FBtr0340143	FBgn0030017	CG2278-RC	146	-10.9	146	-10.9	27562	2121	1046
FBtr0071178	FBgn0030029	CG15343-RA	146	-9.57	146	-9.57	27575	171	81
FBtr0112964	FBgn0030049	Trf4-1-RG	146	-8.15	146	-8.15	27599	3221	2566
FBtr0331725	FBgn0030049	Trf4-1-RJ	146	-8.15	146	-8.15	27602	3221	2566
FBtr0307207	FBgn0030613	Rab3-GEF-RC	146	-12.15	146	-12.15	28270	1702	1216
FBtr0307208	FBgn0030613	Rab3-GEF-RD	146	-12.15	146	-12.15	28271	1702	1216
FBtr0307209	FBgn0030613	Rab3-GEF-RE	146	-12.15	146	-12.15	28272	1702	1216
FBtr0330400	FBgn0030613	Rab3-GEF-RG	146	-12.15	146	-12.15	28274	2704	2218
FBtr0330401	FBgn0030613	Rab3-GEF-RH	146	-12.15	146	-12.15	28275	1525	1039
FBtr0346798	FBgn0030613	Rab3-GEF-RI	146	-12.15	146	-12.15	28276	1702	1216
FBtr0074697	FBgn0030990	CG7556-RA	146	-10.97	146	-10.97	28784	285	43
FBtr0343313	FBgn0030990	CG7556-RB	146	-10.97	146	-10.97	28785	1173	43
FBtr0078160	FBgn0031219	CG13694-RA	146	-10.32	146	-10.32	29105	348	230
FBtr0336838	FBgn0031219	CG13694-RB	146	-10.32	146	-10.32	29106	348	230
FBtr0344769	FBgn0031741	CG11034-RD	146	-10.31	146	-10.31	29790	2072	11
FBtr0075357	FBgn0000017	Abl-RA	145	-9.95	145	-9.95	16	404	220
FBtr0330130	FBgn0000017	Abl-RC	145	-9.95	145	-9.95	18	404	220
FBtr0330131	FBgn0000017	Abl-RD	145	-9.95	145	-9.95	19	404	220
FBtr0330132	FBgn0000017	Abl-RE	145	-9.95	145	-9.95	20	404	220
FBtr0330133	FBgn0000017	Abl-RF	145	-9.95	145	-9.95	21	404	220
FBtr0330134	FBgn0000017	Abl-RG	145	-9.95	145	-9.95	22	404	220
FBtr0330135	FBgn0000017	Abl-RH	145	-9.95	145	-9.95	23	404	220
FBtr0330136	FBgn0000017	Abl-RI	145	-9.95	145	-9.95	24	320	136
FBtr0073300	FBgn0000038	nAChRbeta1-RB	145	-7.93	145	-7.93	52	383	230
FBtr0081412	FBgn0000251	cad-RA	145	-10.23	145	-10.23	274	855	23
FBtr0081413	FBgn0000251	cad-RB	145	-10.23	145	-10.23	275	855	23
FBtr0335152	FBgn0000251	cad-RC	145	-10.23	145	-10.23	276	855	23
FBtr0332022	FBgn0001991	Ca-alpha1D-RG	145	-10.38	145	-10.38	1050	1349	285
FBtr0084959	FBgn0002632	E(spl)m6-BFM-RA	145	-8.77	145	-8.77	1190	851	167
FBtr0088223	FBgn0033551	CG7222-RA	145	-11.95	145	-11.95	3627	671	150
FBtr0345945	FBgn0033551	CG7222-RB	145	-11.95	145	-11.95	3628	671	150
FBtr0300874	FBgn0034990	CG11406-RC	145	-15.18	145	-15.18	5259	3341	68
FBtr0343437	FBgn0034990	CG11406-RD	145	-15.18	145	-15.18	5260	3413	68
FBtr0072336	FBgn0035041	CG13594-RA	145	-10.07	145	-10.07	5323	783	606
FBtr0343492	FBgn0035041	CG13594-RB	145	-10.07	145	-10.07	5324	783	606
FBtr0076710	FBgn0035872	CG7185-RA	145	-8.69	145	-8.69	6339	538	412
FBtr0304628	FBgn0035872	CG7185-RB	145	-8.69	145	-8.69	6340	538	412
FBtr0114616	FBgn0037040	CG12983-RB	145	-10.39	145	-10.39	7778	2657	2572
FBtr0114617	FBgn0037040	CG12983-RC	145	-10.39	145	-10.39	7779	3084	2993
FBtr0114618	FBgn0037040	CG12983-RD	145	-10.39	145	-10.39	7780	198	111
FBtr0333285	FBgn0037040	CG12983-RF	145	-10.39	145	-10.39	7781	2965	2874
FBtr0308681	FBgn0037040	CG12983-RE	145	-10.39	145	-10.39	7782	2891	2800
FBtr0074520	FBgn0004028	wupA-RA	145	-8.67	145	-8.67	11262	393	200
FBtr0074521	FBgn0004028	wupA-RB	145	-8.67	145	-8.67	11263	393	200
FBtr0074522	FBgn0004028	wupA-RC	145	-8.67	145	-8.67	11264	393	200
FBtr0074523	FBgn0004028	wupA-RD	145	-8.67	145	-8.67	11265	393	200
FBtr0074524	FBgn0004028	wupA-RG	145	-8.67	145	-8.67	11266	393	200
FBtr0074525	FBgn0004028	wupA-RF	145	-8.67	145	-8.67	11267	393	200
FBtr0074526	FBgn0004028	wupA-RE	145	-8.67	145	-8.67	11268	393	200
FBtr0336895	FBgn0004028	wupA-RK	145	-8.67	145	-8.67	11269	393	200
FBtr0336896	FBgn0004028	wupA-RL	145	-8.67	145	-8.67	11270	393	200
FBtr0336897	FBgn0004028	wupA-RM	145	-8.67	145	-8.67	11271	393	200
FBtr0308237	FBgn0004028	wupA-RJ	145	-8.67	145	-8.67	11274	299	270
FBtr0082851	FBgn0004237	Hrb87F-RA	145	-10.83	145	-10.83	11385	979	666
FBtr0334495	FBgn0004237	Hrb87F-RE	145	-10.83	145	-10.83	11388	1457	666
FBtr0077828	FBgn0004507	GlyP-RA	145	-12.31	145	-12.31	11520	410	61
FBtr0100485	FBgn0004507	GlyP-RB	145	-12.31	145	-12.31	11521	157	61
FBtr0303420	FBgn0004910	Eip63F-1-RB	145	-9.78	145	-9.78	11854	1919	937
FBtr0303422	FBgn0004910	Eip63F-1-RD	145	-9.78	145	-9.78	11856	1919	937
FBtr0074819	FBgn0005198	gig-RA	145	-12.44	145	-12.44	11887	123	9
FBtr0332690	FBgn0005198	gig-RB	145	-12.44	145	-12.44	11888	123	9
FBtr0089091	FBgn0039920	CG11360-RA	145	-14.43	145	-14.43	12743	3555	2958
FBtr0310539	FBgn0039920	CG11360-RC	145	-14.43	145	-14.43	12744	4610	2958
FBtr0113407	FBgn0051427	CG31427-RC	145	-12.78	145	-12.78	14685	332	255
FBtr0304107	FBgn0051427	CG31427-RD	145	-12.78	145	-12.78	14686	332	255
FBtr0332432	FBgn0051427	CG31427-RE	145	-12.78	145	-12.78	14687	226	149
FBtr0332433	FBgn0051427	CG31427-RF	145	-12.78	145	-12.78	14688	151	74
FBtr0075210	FBgn0052177	Ndfip-RA	145	-11.65	145	-11.65	15218	999	819
FBtr0073799	FBgn0052631	CG32631-RA	145	-8.41	145	-8.41	15544	273	216
FBtr0086608	FBgn0053147	Hs3st-A-RA	145	-15.86	145	-15.86	15869	2345	2203
FBtr0345672	FBgn0053147	Hs3st-A-RB	145	-15.86	145	-15.86	15870	2499	2203
FBtr0112593	FBgn0085397	Fili-RC	145	-10.38	145	-10.38	16905	1783	90
FBtr0330338	FBgn0085397	Fili-RD	145	-10.38	145	-10.38	16906	1783	90
FBtr0333612	FBgn0085420	CG34391-RE	145	-9.91	145	-9.91	16962	2807	2498
FBtr0079490	FBgn0261800	LanB1-RA	145	-10.38	145	-10.38	19294	320	84
FBtr0079491	FBgn0261800	LanB1-RB	145	-10.38	145	-10.38	19295	320	84
FBtr0303797	FBgn0261999	CG42817-RA	145	-11.23	145	-11.23	19498	672	15
FBtr0332356	FBgn0261999	CG42817-RB	145	-11.23	145	-11.23	19499	1543	15
FBtr0343599	FBgn0262738	norpA-RF	145	-6.9	145	-6.9	19928	3374	3312
FBtr0100671	FBgn0262738	norpA-RD	145	-6.9	145	-6.9	19929	3374	3312
FBtr0070651	FBgn0262738	norpA-RA	145	-6.9	145	-6.9	19931	3374	3312
FBtr0301475	FBgn0262738	norpA-RE	145	-6.9	145	-6.9	19933	3374	3312
FBtr0085178	FBgn0010328	woc-RA	145	-11.05	145	-11.05	20263	711	304
FBtr0112857	FBgn0010328	woc-RB	145	-11.05	145	-11.05	20264	711	304
FBtr0334730	FBgn0010328	woc-RD	145	-11.05	145	-11.05	20266	711	304
FBtr0334731	FBgn0010328	woc-RE	145	-11.05	145	-11.05	20267	711	304
FBtr0345928	FBgn0010357	betaTry-RB	145	-8.95	145	-8.95	20305	292	250
FBtr0301547	FBgn0010575	sbb-RD	145	-7.28	145	-7.28	20459	1123	32
FBtr0301550	FBgn0010575	sbb-RG	145	-7.28	145	-7.28	20462	1905	32
FBtr0301551	FBgn0010575	sbb-RH	145	-7.28	145	-7.28	20463	1038	32
FBtr0075991	FBgn0011335	l(3)j2D3-RA	145	-9.95	145	-9.95	20696	206	45
FBtr0112610	FBgn0263117	CG34377-RA	145	-9.96	145	-9.96	21210	3280	215
FBtr0330388	FBgn0263117	CG34377-RC	145	-9.96	145	-9.96	21211	3280	215
FBtr0347067	FBgn0263117	CG34377-RE	145	-9.96	145	-9.96	21212	3247	182
FBtr0307884	FBgn0263117	CG34377-RB	145	-9.96	145	-9.96	21213	3280	215
FBtr0345325	FBgn0263117	CG34377-RD	145	-9.96	145	-9.96	21214	3280	215
FBtr0310390	FBgn0263741	CG43666-RA	145	-11.87	145	-11.87	21535	122	61
FBtr0071374	FBgn0267253	CG32700-RB	145	-8.68	145	-8.68	23066	3110	880
FBtr0070837	FBgn0013987	MAPk-Ak2-RB	145	-9.75	145	-9.75	23360	808	212
FBtr0070839	FBgn0013987	MAPk-Ak2-RD	145	-9.75	145	-9.75	23361	808	212
FBtr0302940	FBgn0013987	MAPk-Ak2-RE	145	-9.75	145	-9.75	23362	808	212
FBtr0308577	FBgn0013987	MAPk-Ak2-RF	145	-9.75	145	-9.75	23363	808	212
FBtr0085351	FBgn0015589	Apc-RA	145	-10.04	145	-10.04	23757	934	404
FBtr0336767	FBgn0015589	Apc-RB	145	-10.04	145	-10.04	23758	934	404
FBtr0088505	FBgn0016970	l(2)k10201-RA	145	-8.03	145	-8.03	24102	145	1
FBtr0100536	FBgn0024182	waw-RA	145	-12.76	145	-12.76	24932	3328	702
FBtr0309501	FBgn0028369	kirre-RF	145	-9.62	145	-9.62	26424	2107	550
FBtr0331718	FBgn0030400	CG11138-RE	145	-10.43	145	-10.43	28015	3317	3158
FBtr0074794	FBgn0031068	Alr-RA	145	-13.76	145	-13.76	28914	316	84
FBtr0331763	FBgn0031068	Alr-RB	145	-13.76	145	-13.76	28915	316	84
FBtr0339506	FBgn0031187	Usp2-RH	145	-8.26	145	-8.26	29065	1962	1817
FBtr0075148	FBgn0000568	Eip75B-RB	144	-9.07	144	-9.07	594	283	196
FBtr0075149	FBgn0000568	Eip75B-RC	144	-9.07	144	-9.07	595	1479	196
FBtr0075150	FBgn0000568	Eip75B-RA	144	-9.07	144	-9.07	596	1479	196
FBtr0075151	FBgn0000568	Eip75B-RD	144	-9.07	144	-9.07	597	283	196
FBtr0306813	FBgn0000568	Eip75B-RE	144	-9.07	144	-9.07	598	283	196
FBtr0306814	FBgn0000568	Eip75B-RF	144	-9.07	144	-9.07	599	2688	196
FBtr0347013	FBgn0000568	Eip75B-RG	144	-9.07	144	-9.07	600	283	196
FBtr0290242	FBgn0031856	CG11322-RB	144	-11.17	144	-11.17	1476	188	164
FBtr0337004	FBgn0032261	CG6094-RB	144	-8.05	144	-8.05	2054	164	111
FBtr0304622	FBgn0033652	ths-RB	144	-8.99	144	-8.99	3730	2556	1290
FBtr0073364	FBgn0035570	CG13712-RA	144	-9.56	144	-9.56	6010	294	1
FBtr0076145	FBgn0036177	CG33268-RA	144	-12.21	144	-12.21	6699	66	43
FBtr0075049	FBgn0036801	MYPT-75D-RA	144	-9.37	144	-9.37	7440	923	357
FBtr0331420	FBgn0036801	MYPT-75D-RB	144	-9.37	144	-9.37	7441	923	357
FBtr0331421	FBgn0036801	MYPT-75D-RC	144	-9.37	144	-9.37	7442	923	357
[truncated: 360 more rows]

## Sheet: GO Process
GO term	Description	P-value	FDR q-value	Enrichment (N, B, n, b)
GO:0065007	biological regulation	1.67e-29	1e-25	1.88 (11411,3274,438,236)
GO:0050794	regulation of cellular process	2.69e-26	8.08e-23	1.94 (11411,2765,438,206)
GO:0050789	regulation of biological process	4.87e-26	9.74e-23	1.88 (11411,3015,438,217)
GO:0007610	behavior	2.61e-19	3.91e-16	3.42 (11411,511,438,67)
GO:0051239	regulation of multicellular organismal process	7.16e-16	8.6e-13	2.97 (11411,579,438,66)
GO:0019222	regulation of metabolic process	5.1e-15	5.1e-12	2.02 (11411,1549,438,120)
GO:0044708	single-organism behavior	6.85e-15	5.88e-12	3.42 (11411,388,438,51)
GO:0048856	anatomical structure development	1.86e-14	1.4e-11	2.07 (11411,1384,438,110)
GO:0048518	positive regulation of biological process	1.1e-13	7.32e-11	2.25 (11411,1031,438,89)
GO:0050793	regulation of developmental process	3.59e-13	2.16e-10	2.64 (11411,642,438,65)
GO:0009653	anatomical structure morphogenesis	3.73e-13	2.04e-10	2.22 (11411,1035,438,88)
GO:0044699	single-organism process	4.75e-13	2.38e-10	1.32 (11411,5866,438,298)
GO:0065008	regulation of biological quality	7.97e-13	3.68e-10	2.37 (11411,837,438,76)
GO:0048519	negative regulation of biological process	1.21e-12	5.21e-10	2.16 (11411,1075,438,89)
GO:0032502	developmental process	2.55e-12	1.02e-09	1.61 (11411,2733,438,169)
GO:0048869	cellular developmental process	3.09e-12	1.16e-09	1.90 (11411,1533,438,112)
GO:0007165	signal transduction	4.57e-12	1.61e-09	2.27 (11411,884,438,77)
GO:0040007	growth	5.27e-12	1.76e-09	4.42 (11411,177,438,30)
GO:0044763	single-organism cellular process	8.19e-12	2.59e-09	1.42 (11411,4308,438,234)
GO:0044767	single-organism developmental process	9.65e-12	2.9e-09	1.61 (11411,2640,438,163)
GO:0032879	regulation of localization	1.23e-11	3.51e-09	3.50 (11411,283,438,38)
GO:0051640	organelle localization	1.24e-11	3.39e-09	4.56 (11411,160,438,28)
GO:0051128	regulation of cellular component organization	1.3e-11	3.39e-09	2.58 (11411,596,438,59)
GO:0051049	regulation of transport	1.68e-11	4.21e-09	4.22 (11411,185,438,30)
GO:0031323	regulation of cellular metabolic process	2.03e-11	4.88e-09	1.94 (11411,1341,438,100)
GO:0048523	negative regulation of cellular process	2.66e-11	6.15e-09	2.16 (11411,952,438,79)
GO:0048522	positive regulation of cellular process	2.96e-11	6.59e-09	2.20 (11411,900,438,76)
GO:0016043	cellular component organization	5.39e-11	1.16e-08	1.74 (11411,1891,438,126)
GO:0010468	regulation of gene expression	5.46e-11	1.13e-08	2.07 (11411,1058,438,84)
GO:0007623	circadian rhythm	5.54e-11	1.11e-08	6.43 (11411,77,438,19)
GO:0009987	cellular process	6.15e-11	1.19e-08	1.32 (11411,5464,438,276)
GO:0048511	rhythmic process	8.98e-11	1.69e-08	6.27 (11411,79,438,19)
GO:0044707	single-multicellular organism process	9.61e-11	1.75e-08	1.88 (11411,1397,438,101)
GO:0022414	reproductive process	1.08e-10	1.91e-08	2.23 (11411,817,438,70)
GO:0048589	developmental growth	1.4e-10	2.41e-08	4.59 (11411,142,438,25)
GO:0006928	movement of cell or subcellular component	1.44e-10	2.41e-08	2.56 (11411,550,438,54)
GO:0071840	cellular component organization or biogenesis	1.51e-10	2.46e-08	1.71 (11411,1920,438,126)
GO:2000026	regulation of multicellular organismal development	1.54e-10	2.44e-08	2.82 (11411,425,438,46)
GO:0009893	positive regulation of metabolic process	1.85e-10	2.85e-08	2.51 (11411,570,438,55)
GO:0060255	regulation of macromolecule metabolic process	2.62e-10	3.93e-08	1.90 (11411,1303,438,95)
GO:0007626	locomotory behavior	4.29e-10	6.29e-08	4.21 (11411,161,438,26)
GO:0051171	regulation of nitrogen compound metabolic process	6.28e-10	8.98e-08	2.06 (11411,960,438,76)
GO:0048468	cell development	7.67e-10	1.07e-07	2.69 (11411,446,438,46)
GO:0048609	multicellular organismal reproductive process	8.99e-10	1.23e-07	2.75 (11411,417,438,44)
GO:0051179	localization	9.02e-10	1.2e-07	1.74 (11411,1678,438,112)
GO:0040011	locomotion	1.43e-09	1.87e-07	2.88 (11411,362,438,40)
GO:0019219	regulation of nucleobase-containing compound metabolic process	1.6e-09	2.05e-07	2.06 (11411,924,438,73)
GO:0010646	regulation of cell communication	2.09e-09	2.62e-07	2.29 (11411,660,438,58)
GO:0007411	axon guidance	2.34e-09	2.87e-07	3.56 (11411,212,438,29)
GO:0051252	regulation of RNA metabolic process	2.64e-09	3.17e-07	2.07 (11411,879,438,70)
GO:0048638	regulation of developmental growth	2.73e-09	3.21e-07	3.87 (11411,175,438,26)
GO:0023051	regulation of signaling	3.35e-09	3.87e-07	2.28 (11411,651,438,57)
GO:0080090	regulation of primary metabolic process	4.14e-09	4.69e-07	1.86 (11411,1233,438,88)
GO:0032501	multicellular organismal process	4.22e-09	4.69e-07	1.72 (11411,1639,438,108)
GO:0051656	establishment of organelle localization	4.58e-09	5e-07	4.38 (11411,131,438,22)
GO:0097485	neuron projection guidance	5.57e-09	5.98e-07	3.43 (11411,220,438,29)
GO:0040008	regulation of growth	6.48e-09	6.83e-07	3.33 (11411,235,438,30)
GO:0002009	morphogenesis of an epithelium	6.87e-09	7.12e-07	3.40 (11411,222,438,29)
GO:0007391	dorsal closure	9.87e-09	1e-06	5.10 (11411,92,438,18)
GO:0051705	multi-organism behavior	9.9e-09	9.91e-07	3.76 (11411,173,438,25)
GO:0048512	circadian behavior	1.02e-08	1.01e-06	6.20 (11411,63,438,15)
GO:1902578	single-organism localization	1.06e-08	1.03e-06	1.77 (11411,1398,438,95)
GO:0048729	tissue morphogenesis	1.15e-08	1.09e-06	3.33 (11411,227,438,29)
GO:0031325	positive regulation of cellular metabolic process	1.31e-08	1.23e-06	2.43 (11411,504,438,47)
GO:0051641	cellular localization	1.37e-08	1.27e-06	2.79 (11411,345,438,37)
GO:0007622	rhythmic behavior	1.62e-08	1.48e-06	6.01 (11411,65,438,15)
GO:0048731	system development	2.26e-08	2.02e-06	2.89 (11411,306,438,34)
GO:0022412	cellular process involved in reproduction in multicellular organism	3.18e-08	2.81e-06	2.22 (11411,622,438,53)
GO:0022607	cellular component assembly	3.86e-08	3.36e-06	2.30 (11411,556,438,49)
GO:0050804	regulation of synaptic transmission	3.94e-08	3.38e-06	5.28 (11411,79,438,16)
GO:0042461	photoreceptor cell development	4.13e-08	3.5e-06	6.64 (11411,51,438,13)
GO:0016331	morphogenesis of embryonic epithelium	5.34e-08	4.46e-06	4.60 (11411,102,438,18)
GO:0050808	synapse organization	6.25e-08	5.14e-06	4.55 (11411,103,438,18)
GO:0031326	regulation of cellular biosynthetic process	6.39e-08	5.19e-06	1.92 (11411,950,438,70)
GO:0009889	regulation of biosynthetic process	6.66e-08	5.33e-06	1.92 (11411,951,438,70)
GO:0051648	vesicle localization	1.01e-07	7.99e-06	5.70 (11411,64,438,14)
GO:0048513	organ development	1.09e-07	8.49e-06	2.18 (11411,610,438,51)
GO:0048640	negative regulation of developmental growth	1.24e-07	9.58e-06	5.61 (11411,65,438,14)
GO:0048488	synaptic vesicle endocytosis	1.35e-07	1.02e-05	8.40 (11411,31,438,10)
GO:0042462	eye photoreceptor cell development	1.36e-07	1.02e-05	6.65 (11411,47,438,12)
GO:0051234	establishment of localization	1.59e-07	1.18e-05	1.66 (11411,1519,438,97)
GO:0010628	positive regulation of gene expression	1.62e-07	1.19e-05	2.72 (11411,316,438,33)
GO:0007416	synapse assembly	1.72e-07	1.25e-05	5.94 (11411,57,438,13)
GO:0048663	neuron fate commitment	1.75e-07	1.25e-05	6.51 (11411,48,438,12)
GO:0048666	neuron development	2.21e-07	1.56e-05	4.43 (11411,100,438,17)
GO:0045475	locomotor rhythm	2.65e-07	1.85e-05	5.74 (11411,59,438,13)
GO:0044765	single-organism transport	2.84e-07	1.96e-05	1.72 (11411,1288,438,85)
GO:0051093	negative regulation of developmental process	3.2e-07	2.19e-05	3.08 (11411,220,438,26)
GO:0051173	positive regulation of nitrogen compound metabolic process	3.35e-07	2.26e-05	2.64 (11411,326,438,33)
GO:0001752	compound eye photoreceptor fate commitment	3.43e-07	2.29e-05	6.82 (11411,42,438,11)
GO:0042706	eye photoreceptor cell fate commitment	3.43e-07	2.26e-05	6.82 (11411,42,438,11)
GO:2000112	regulation of cellular macromolecule biosynthetic process	3.9e-07	2.54e-05	1.89 (11411,898,438,65)
GO:0032989	cellular component morphogenesis	3.93e-07	2.54e-05	2.39 (11411,426,438,39)
GO:0010556	regulation of macromolecule biosynthetic process	4.22e-07	2.7e-05	1.88 (11411,900,438,65)
GO:0046552	photoreceptor cell fate commitment	4.45e-07	2.81e-05	6.66 (11411,43,438,11)
GO:0048583	regulation of response to stimulus	4.94e-07	3.09e-05	1.93 (11411,808,438,60)
GO:0045935	positive regulation of nucleobase-containing compound metabolic process	5.27e-07	3.26e-05	2.68 (11411,301,438,31)
GO:0045595	regulation of cell differentiation	5.79e-07	3.55e-05	2.62 (11411,318,438,32)
GO:0042051	compound eye photoreceptor development	7.33e-07	4.45e-05	6.37 (11411,45,438,11)
GO:0009892	negative regulation of metabolic process	7.34e-07	4.41e-05	2.19 (11411,523,438,44)
GO:0044702	single organism reproductive process	7.44e-07	4.42e-05	2.01 (11411,686,438,53)
GO:0010608	posttranscriptional regulation of gene expression	7.92e-07	4.67e-05	3.42 (11411,160,438,21)
GO:0009891	positive regulation of biosynthetic process	8.19e-07	4.77e-05	2.54 (11411,339,438,33)
GO:0031328	positive regulation of cellular biosynthetic process	8.19e-07	4.73e-05	2.54 (11411,339,438,33)
GO:0010604	positive regulation of macromolecule metabolic process	1.13e-06	6.45e-05	2.32 (11411,427,438,38)
GO:0006355	regulation of transcription, DNA-templated	1.13e-06	6.41e-05	1.90 (11411,809,438,59)
GO:2001141	regulation of RNA biosynthetic process	1.13e-06	6.35e-05	1.90 (11411,809,438,59)
GO:1903506	regulation of nucleic acid-templated transcription	1.13e-06	6.29e-05	1.90 (11411,809,438,59)
GO:0045467	R7 cell development	1.3e-06	7.19e-05	9.06 (11411,23,438,8)
GO:0051254	positive regulation of RNA metabolic process	1.37e-06	7.49e-05	2.67 (11411,283,438,29)
GO:0006810	transport	1.42e-06	7.68e-05	1.62 (11411,1464,438,91)
GO:0007267	cell-cell signaling	1.5e-06	8.04e-05	2.51 (11411,332,438,32)
GO:0016477	cell migration	1.59e-06	8.47e-05	2.83 (11411,239,438,26)
GO:0060341	regulation of cellular localization	1.59e-06	8.4e-05	3.54 (11411,140,438,19)
GO:0051241	negative regulation of multicellular organismal process	2.11e-06	0.00011	3.34 (11411,156,438,20)
GO:0045926	negative regulation of growth	2.12e-06	0.00011	4.50 (11411,81,438,14)
GO:0010605	negative regulation of macromolecule metabolic process	2.12e-06	0.000109	2.20 (11411,473,438,40)
GO:0048489	synaptic vesicle transport	2.31e-06	0.000117	5.21 (11411,60,438,12)
GO:0097480	establishment of synaptic vesicle localization	2.31e-06	0.000116	5.21 (11411,60,438,12)
GO:0051650	establishment of vesicle localization	2.31e-06	0.000115	5.21 (11411,60,438,12)
GO:0060560	developmental growth involved in morphogenesis	2.31e-06	0.000114	5.21 (11411,60,438,12)
GO:0044700	single organism signaling	2.51e-06	0.000123	2.45 (11411,340,438,32)
GO:0007276	gamete generation	2.59e-06	0.000126	2.54 (11411,308,438,30)
GO:1902680	positive regulation of RNA biosynthetic process	2.74e-06	0.000133	2.63 (11411,277,438,28)
GO:0045893	positive regulation of transcription, DNA-templated	2.74e-06	0.000131	2.63 (11411,277,438,28)
GO:1903508	positive regulation of nucleic acid-templated transcription	2.74e-06	0.00013	2.63 (11411,277,438,28)
GO:0022604	regulation of cell morphogenesis	2.84e-06	0.000134	3.28 (11411,159,438,20)
GO:0023052	signaling	2.84e-06	0.000133	2.44 (11411,342,438,32)
GO:0007528	neuromuscular junction development	2.95e-06	0.000137	4.70 (11411,72,438,13)
GO:0007154	cell communication	3.06e-06	0.000142	2.22 (11411,445,438,38)
GO:0010629	negative regulation of gene expression	3.54e-06	0.000162	2.34 (11411,379,438,34)
GO:0048870	cell motility	3.7e-06	0.000168	2.71 (11411,250,438,26)
GO:0051124	synaptic growth at neuromuscular junction	3.71e-06	0.000168	6.90 (11411,34,438,9)
GO:0044705	multi-organism reproductive behavior	3.92e-06	0.000176	3.63 (11411,122,438,17)
GO:0048584	positive regulation of response to stimulus	4.11e-06	0.000183	2.40 (11411,348,438,32)
GO:0048598	embryonic morphogenesis	4.14e-06	0.000183	3.09 (11411,177,438,21)
GO:0010557	positive regulation of macromolecule biosynthetic process	4.15e-06	0.000182	2.53 (11411,299,438,29)
GO:1902580	single-organism cellular localization	5.06e-06	0.00022	2.61 (11411,270,438,27)
GO:0006796	phosphate-containing compound metabolic process	5.1e-06	0.00022	1.98 (11411,618,438,47)
GO:0019098	reproductive behavior	5.48e-06	0.000235	3.54 (11411,125,438,17)
GO:0006897	endocytosis	6.22e-06	0.000265	2.52 (11411,289,438,28)
GO:0051960	regulation of nervous system development	6.41e-06	0.000271	2.69 (11411,242,438,25)
GO:0003006	developmental process involved in reproduction	7.25e-06	0.000305	1.94 (11411,645,438,48)
GO:0009887	organ morphogenesis	8.08e-06	0.000337	2.49 (11411,293,438,28)
GO:0022402	cell cycle process	8.09e-06	0.000335	1.96 (11411,610,438,46)
GO:0006793	phosphorus metabolic process	8.17e-06	0.000336	1.95 (11411,629,438,47)
GO:0031324	negative regulation of cellular metabolic process	8.49e-06	0.000347	2.16 (11411,447,438,37)
GO:0065009	regulation of molecular function	8.61e-06	0.00035	2.48 (11411,294,438,28)

## Sheet: GO Function
GO term	Description	P-value	FDR q-value	Enrichment (N, B, n, b)
GO:0005515	protein binding	2.69e-14	6.83e-11	1.95 (11411,1643,438,123)
GO:0005488	binding	2.11e-12	2.68e-09	1.40 (11411,4609,438,248)
GO:0003729	mRNA binding	4.84e-10	4.1e-07	3.92 (11411,186,438,28)
GO:0044822	poly(A) RNA binding	7.05e-10	4.48e-07	3.86 (11411,189,438,28)
GO:0003676	nucleic acid binding	2.46e-08	1.25e-05	1.73 (11411,1442,438,96)
GO:0097159	organic cyclic compound binding	5.01e-07	0.000212	1.47 (11411,2392,438,135)
GO:1901363	heterocyclic compound binding	5.76e-07	0.000209	1.47 (11411,2375,438,134)
GO:0003730	mRNA 3'-UTR binding	1.89e-06	0.000601	8.68 (11411,24,438,8)
GO:0005267	potassium channel activity	5.16e-06	0.00146	7.72 (11411,27,438,8)

## Sheet: GO Component
GO term	Description	P-value	FDR q-value	Enrichment (N, B, n, b)
GO:0044464	cell part	2.72e-13	2.73e-10	1.35 (11411,5468,438,284)
GO:0044456	synapse part	1.43e-11	7.19e-09	4.87 (11411,139,438,26)
GO:0005886	plasma membrane	1.92e-10	6.41e-08	2.66 (11411,490,438,50)
GO:0097458	neuron part	2.16e-10	5.41e-08	3.54 (11411,243,438,33)
GO:0048786	presynaptic active zone	4.34e-08	8.7e-06	13.03 (11411,16,438,8)
GO:0005737	cytoplasm	5.91e-08	9.87e-06	1.94 (11411,929,438,69)
GO:0034702	ion channel complex	5.97e-07	8.54e-05	5.38 (11411,63,438,13)
GO:0005829	cytosol	6.83e-07	8.55e-05	2.70 (11411,289,438,30)
GO:0016020	membrane	1.21e-06	0.000135	1.73 (11411,1127,438,75)
GO:0044424	intracellular part	1.29e-06	0.000129	1.27 (11411,4629,438,226)
GO:0070161	anchoring junction	2.47e-06	0.000225	4.45 (11411,82,438,14)
GO:0008076	voltage-gated potassium channel complex	4.22e-06	0.000352	12.02 (11411,13,438,6)
GO:0044459	plasma membrane part	4.39e-06	0.000338	2.09 (11411,523,438,42)
GO:0034703	cation channel complex	6.23e-06	0.000446	6.51 (11411,36,438,9)
GO:0043005	neuron projection	6.55e-06	0.000437	3.87 (11411,101,438,15)
GO:0034705	potassium channel complex	7.14e-06	0.000447	11.17 (11411,14,438,6)
